# Supplementary material for: Syntheses of 2-(2,2,2-trifluoroethylidene)/(2,2-difluoroethyl)-1,3-dicarbonyl compounds and their fungicidal activities
Source: Royal Society of Chemistry journal article supplement (doi:10.1039/c8qo01118d), 2018-12-07

Supporting Information *for*

**Syntheses of 2-(2,2,2-Trifluoroethylidene)/(2,2-Difluoroethyl)-1,3-Dicarbonyl**

**Compounds and Their Fungicidal Activities**

Yueji Chen, Yi You,\* and Zhiqiang Weng\*

State Key Laboratory of Photocatalysis on Energy and Environment, College of  
Chemistry, Fuzhou University, Fujian 350108, China.

E-mail: youyi@fzu.edu.cn (Y. Y); [zweng@fzu.edu.cn](mailto:zweng@fzu.edu.cn) (Z.W)

**Table of Contents**

|                                                                                                                                       |    |
|---------------------------------------------------------------------------------------------------------------------------------------|----|
| General information.....                                                                                                              | 2  |
| General procedure for synthesis of 1,3-dicarbonyl substrates.....                                                                     | 3  |
| General procedure of 2-(2,2,2-trifluoroethylidene)/(2,2-difluoroethylidene)-1,3-dicarbonyl compounds.                                 | 5  |
| Procedure for gram scale reaction for synthesis of 3-(1-chloro-2,2,2-trifluoroethylidene)-1-methylpyrrolidin-2-one ( <b>3a</b> )..... | 6  |
| The procedure for the synthesis of compound <b>5</b> .....                                                                            | 7  |
| The procedure for the synthesis of compound <b>6</b> .....                                                                            | 8  |
| Data for compounds <b>3–6</b> .....                                                                                                   | 9  |
| Crystal structure analyses.....                                                                                                       | 28 |
| The procedure for the evaluation of fungicidal activities.....                                                                        | 31 |
| References.....                                                                                                                       | 32 |
| Copies of <sup>1</sup> H NMR, <sup>19</sup> F NMR and <sup>13</sup> C NMR spectra.....                                                | 33 |

## General information

$^1\text{H}$  NMR,  $^{19}\text{F}$  NMR and  $^{13}\text{C}$  NMR spectra were recorded using Bruker AVIII 400 spectrometer.  $^1\text{H}$  NMR and  $^{13}\text{C}$  NMR chemical shifts were reported in parts per million (ppm) downfield from tetramethylsilane and  $^{19}\text{F}$  NMR chemical shifts were determined relative to  $\text{CFCl}_3$  as the external standard and low field is positive. Coupling constants ( $J$ ) are reported in Hertz (Hz). The residual solvent peak was used as an internal reference:  $^1\text{H}$  NMR (chloroform  $\delta$  7.26) and  $^{13}\text{C}$  NMR (chloroform  $\delta$  77.0). The following abbreviations were used to explain the multiplicities: s = singlet, d = doublet, t = triplet, q = quartet, m = multiplet, br = broad. HRMS were obtained on Waters GCT-TOF and State Key Discipline Testing Center for Physical Chemistry of Fuzhou University. Reagents were received from commercial sources. Solvents were freshly dried and degassed according to the published procedures prior to use. Column chromatography purifications were performed by flash chromatography using Merck silica gel 60.

## General procedure for synthesis of 1,3-dicarbonyl substrates **1**<sup>1,2</sup>

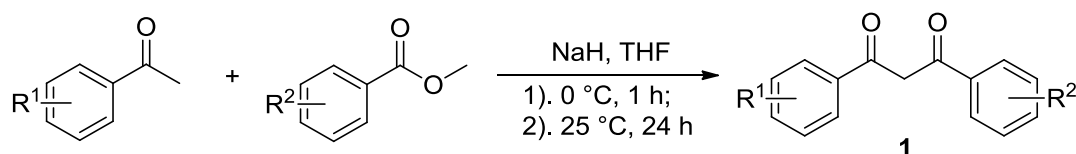

To a suspension of ketone (10 mmol) in THF (40 mL) was added NaH (0.80 g, 20 mmol, 60%). After the reaction mixture was stirred at 0 °C for about 1 h, the ester (10 mmol) was added dropwise at the same temperature. Then the mixture was stirred at room temperature until TLC indicated the total consumption of the ketone. The reaction mixture was poured into ice-water (100 mL), acidified with aqueous HCl (3 M) to pH 2~3 and extracted with EtOAc (100 mL × 3). The combined organic layer was dried over Na<sub>2</sub>SO<sub>4</sub> and evaporated under reduced pressure. The resulting 1,3-diketones were used for the next step without further purification.

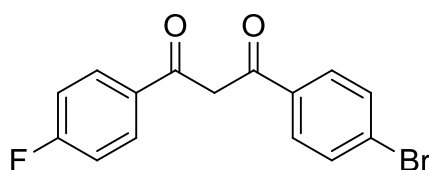

### 1-(4-Bromophenyl)-3-(4-fluorophenyl)propane-1,3-dione (**1s**)

Obtained as a pale yellow solid. M.p. 130–131 °C. <sup>1</sup>H NMR (400 MHz, CDCl<sub>3</sub>): δ 16.82 (s, 1H), 8.16 – 7.95 (m, 2H), 7.87 (d, *J* = 7.2 Hz, 2H), 7.66 (d, *J* = 7.2 Hz, 2H), 7.26 – 7.13 (m, 2H), 6.78 (s, 1H). <sup>13</sup>C NMR (101 MHz, CDCl<sub>3</sub>): δ 185.3 (s), 184.0 (s), 134.2 (s), 132.0 (s), 129.7 (s), 129.6 (s), 128.6 (s), 127.4 (s), 116.0 (s), 115.8 (s), 92.7 (s). <sup>19</sup>F NMR (376 MHz, CDCl<sub>3</sub>) δ -105.5 – -106.0 (m, 1F). IR (KBr): ν 3064, 1579, 1506, 1471, 1293, 1177, 1092, 1049, 1008, 843, 775, 691, 627, 533 cm<sup>-1</sup>. HR-MS (EI): *m/z* calcd. for C<sub>15</sub>H<sub>10</sub>FO<sub>2</sub>Br: 319.9848; found: 319.9842.

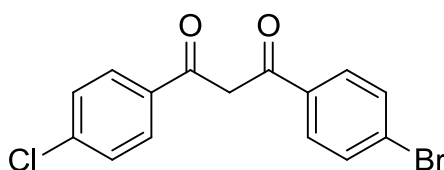

**1-(4-Bromophenyl)-3-(4-chlorophenyl)propane-1,3-dione (1y)**

Obtained as a pale yellow solid. M.p. 175–176 °C.  $^1\text{H}$  NMR (400 MHz,  $\text{CDCl}_3$ ):  $\delta$  16.77 (s, 1H), 7.94 (d,  $J = 7.8$  Hz, 2H), 7.86 (d,  $J = 7.8$  Hz, 2H), 7.65 (d,  $J = 7.4$  Hz, 2H), 7.49 (d,  $J = 7.4$  Hz, 2H), 6.79 (s, 1H).  $^{13}\text{C}$  NMR (101 MHz,  $\text{CDCl}_3$ ):  $\delta$  184.7 (s), 184.6 (s), 139.0 (s), 134.2 (s), 133.8 (s), 132.0 (s), 129.1 (s), 128.7 (s), 128.6 (s), 127.5 (s), 92.9 (s). IR (KBr):  $\nu$  3059, 1588, 1500, 1466, 1304, 1222, 1175, 1110, 1071, 1007, 884, 776, 736, 681, 627, 586  $\text{cm}^{-1}$ . HR-MS (EI):  $m/z$  calcd. for  $\text{C}_{15}\text{H}_{10}\text{O}_2\text{ClBr}$ : 335.9553; found: 335.9549.

**General procedure of synthesis of  
2-(2,2,2-trifluoroethylidene)/(2,2-difluoroethyl)-substituted 1,3-dicarbonyl  
compounds**

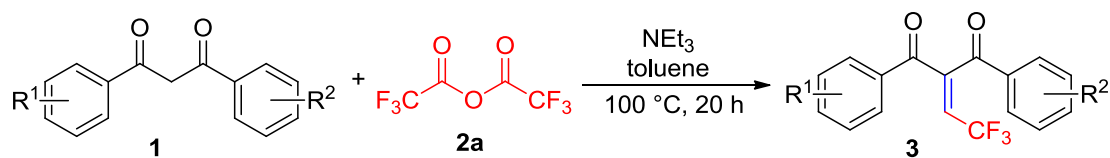

or

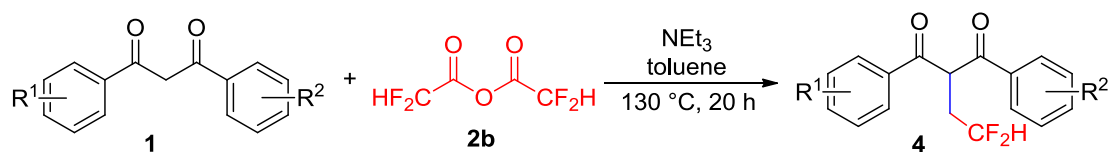

The 1,3-dicarbonyl substrates (**1**) (0.50 mmol), trifluoroacetic anhydride (**2a**) or difluoroacetic anhydride (**2b**) (2.50 mmol, 5.0 equiv),  $\text{Et}_3\text{N}$  (3.5 mmol, 7.0 equiv), and toluene (5.0 mL) were added to a reaction tube equipped with a stir bar. The mixture was stirred at  $100\text{ }^\circ\text{C}$  or  $130\text{ }^\circ\text{C}$  for 20 h. The reaction mixture was diluted with ethyl acetate (30 mL), washed with saturated brine (30 mL), and water (20 mL), dried over  $\text{MgSO}_4$ . The solvent was removed by rotary evaporation and the resulting products **3** or **4** were purified by column chromatography over silica gel (*n*-pentanes/dichloromethane = 5:1 or 2:1).

**Procedure for gram scale reaction for synthesis of  
3-(1-chloro-2,2,2-trifluoroethylidene)-1-methylpyrrolidin-2-one (3a)**

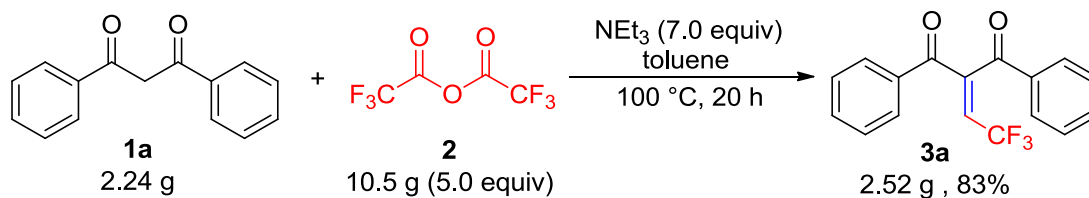

The 1,3-diphenylpropane-1,3-dione (**1a**) (2.24 g, 10.0 mmol), trifluoroacetic anhydride (**2**) (10.5 g, 50.0 mmol, 5.0 equiv),  $\text{Et}_3\text{N}$  (70 mmol, 7.0 equiv), and toluene (30 mL) were added to a reaction tube equipped with a stir bar. The mixture was stirred at 100 °C for 20 h under nitrogen atmosphere. The reaction mixture was diluted with ethyl acetate (80 mL), washed with saturated brine (100 mL), and water (400 mL), dried over  $\text{MgSO}_4$ . The solvent was removed by rotary evaporation and the resulting product **3a** was purified by column chromatography over silica gel (*n*-pentanes/dichloroethane = 5:1).

### The procedure for the synthesis of compound **5**

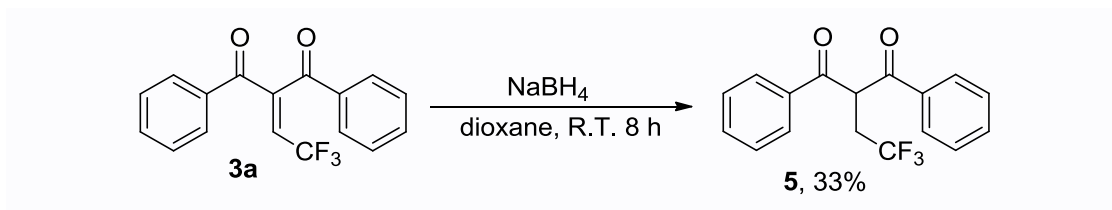

1,3-Diphenyl-2-(2,2,2-trifluoroethylidene)propane-1,3-dione (**3a**) (152.0 mg, 0.50 mmol), sodium borohydride (37.0 mg, 1.0 mmol, 2.0 equiv), dry 1,4-dioxane (5 mL) were added to a reaction tube equipped with a stir bar a reaction tube equipped. The mixture was stirred at room temperature for 8 h. The reaction mixture was then diluted with ethyl acetate (30 mL), washed with saturated brine (30 mL), and water (20 mL), dried over MgSO<sub>4</sub>. The solvent was removed by rotary evaporation and the product **5** was purified by column chromatography over silica gel (*n*-pentanes/ethyl acetate = 5:1).

### The procedure for the synthesis of compound 6

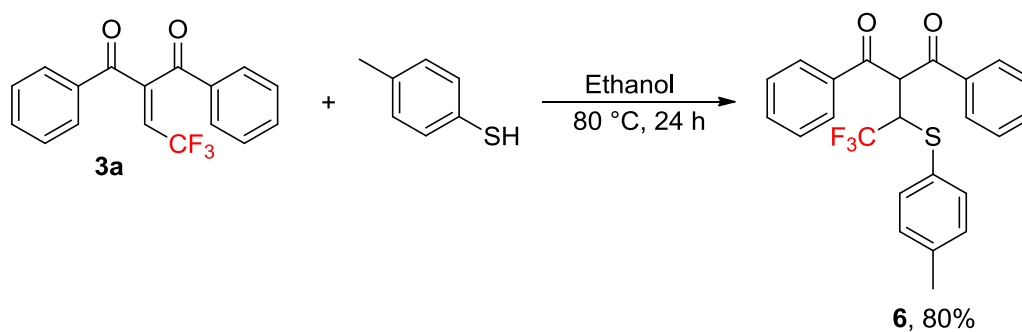

1,3-Diphenyl-2-(2,2,2-trifluoroethylidene)propane-1,3-dione (**3a**) (60.8 mg, 0.20 mmol), 4-methylbenzenethiol (0.20 mmol, 1.0 equiv), ethanol (2 mL) were added to a reaction tube equipped with a stir bar a reaction tube equipped. The resulting mixture was heated at 80 °C for 24 h. The reaction mixture was diluted with ethyl acetate (30 mL), washed with saturated brine (30 mL), and water (20 mL), dried over  $\text{MgSO}_4$ . The solvent was removed by rotary evaporation and the resulting residue was purified by recrystallization.



### Data for compounds 3–6.

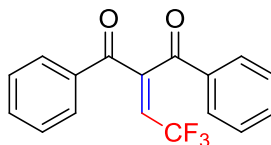

#### 1,3-Diphenyl-2-(2,2,2-trifluoroethylidene)propane-1,3-dione (3a)

Obtained as a pale yellow oil in 85% yield (129 mg).  $R_f$  (*n*-pentane/dichloroethane = 5:1) = 0.30.  $^1\text{H}$  NMR (400 MHz,  $\text{CDCl}_3$ ):  $\delta$  8.02 (d,  $J$  = 7.3 Hz, 4H), 7.65 (dd,  $J$  = 14.2, 7.1 Hz, 2H), 7.53 (dd,  $J$  = 12.4, 7.2 Hz, 4H), 6.35 (q,  $J$  = 7.5 Hz, 1H).  $^{13}\text{C}$  NMR (101 MHz,  $\text{CDCl}_3$ ):  $\delta$  191.1 (s), 190.9 (s), 148.9 (q,  $J$  = 4.6 Hz), 135.2 (s), 134.9 (s), 134.6 (s), 134.5 (s), 130.3 (s), 129.8 (s), 129.0 (s), 128.9 (s), 124.7 (q,  $J$  = 36.3 Hz), 121.7 (q,  $J$  = 272.6 Hz).  $^{19}\text{F}$  NMR (376 MHz,  $\text{CDCl}_3$ ):  $\delta$  -60.1 (d,  $J$  = 7.5 Hz, 3F). IR (KBr):  $\nu$  3066, 2254, 1659, 1597, 1580, 1345, 1256, 1161, 1066, 860, 803, 684, 584, 480  $\text{cm}^{-1}$ . HR-MS (EI):  $m/z$  calcd. for  $\text{C}_{17}\text{H}_{11}\text{F}_3\text{O}_2$ : 304.0711; found: 304.0709.

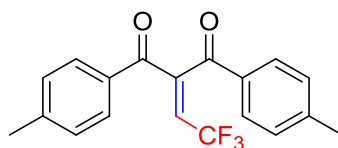

#### 1,3-di-*p*-Tolyl-2-(2,2,2-trifluoroethylidene)propane-1,3-dione (3b)

Obtained as a pale yellow oil in 82% yield (136 mg).  $R_f$  (*n*-pentane/dichloroethane = 5:1) = 0.20.  $^1\text{H}$  NMR (400 MHz,  $\text{CDCl}_3$ ):  $\delta$  7.98 – 7.86 (m, 4H), 7.40 – 7.29 (m, 4H), 6.27 (q,  $J$  = 7.5 Hz, 1H), 2.46 (s, 3H), 2.45 (s, 3H).  $^{13}\text{C}$  NMR (101 MHz,  $\text{CDCl}_3$ ):  $\delta$  190.6 (s), 190.5 (s), 149.6 (q,  $J$  = 4.6 Hz), 145.8 (s), 145.7 (s), 132.9 (q,  $J$  = 0.9 Hz), 132.3 (s), 130.5 (s), 130.0 (s), 129.7 (s), 129.6 (s), 123.8 (q,  $J$  = 36.2 Hz), 121.7 (q,  $J$  = 272.5 Hz), 21.9 (s), 21.8 (s).  $^{19}\text{F}$  NMR (376 MHz,  $\text{CDCl}_3$ ):  $\delta$  -60.1 (d,  $J$  = 7.5 Hz, 3F). IR (KBr):  $\nu$  2925, 2254, 1659, 1605, 1572, 1409, 1344, 1259, 1160, 1141, 1072, 828, 569, 485  $\text{cm}^{-1}$ . HR-MS (EI):  $m/z$  calcd. for  $\text{C}_{19}\text{H}_{15}\text{F}_3\text{O}_2$ : 332.1024; found: 332.1017.

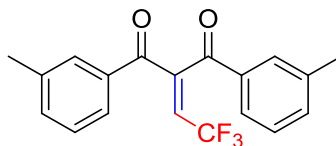

**1,3-di-*m*-Tolyl-2-(2,2,2-trifluoroethylidene)propane-1,3-dione (3c)**

Obtained as a pale yellow oil in 81% yield (134 mg).  $R_f$  (*n*-pentane/dichloroethane = 5:1) = 0.30.  $^1\text{H}$  NMR (400 MHz,  $\text{CDCl}_3$ ):  $\delta$  7.87 – 7.77 (m, 4H), 7.52 – 7.38 (m, 4H), 6.34 (q,  $J$  = 7.5 Hz, 1H), 2.45 (s, 3H), 2.44 (s, 3H).  $^{13}\text{C}$  NMR (101 MHz,  $\text{CDCl}_3$ ):  $\delta$  191.3 (s), 191.1 (s), 149.2 (q,  $J$  = 4.5 Hz), 139.0 (s), 138.8 (s), 135.5 (s), 135.3 (s), 135.2 (s), 135.0 (s), 130.5 (s), 129.9 (s), 128.7 (s), 127.6 (s), 127.4 (s), 124.6 (q,  $J$  = 36.2 Hz), 121.7 (q,  $J$  = 272.5 Hz), 21.3 (s), 21.2 (s).  $^{19}\text{F}$  NMR (376 MHz,  $\text{CDCl}_3$ ):  $\delta$  -60.0 (d,  $J$  = 7.5 Hz, 3F). IR (KBr):  $\nu$  3078, 2255, 1663, 1597, 1506, 1413, 1344, 1239, 1152, 1071, 983, 846, 568, 505  $\text{cm}^{-1}$ . HR-MS (EI):  $m/z$  calcd. for  $\text{C}_{19}\text{H}_{15}\text{F}_3\text{O}_2$ : 332.1024; found: 332.1030.

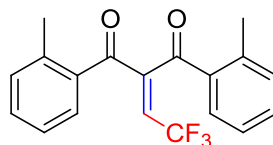

**1,3-di-*o*-Tolyl-2-(2,2,2-trifluoroethylidene)propane-1,3-dione (3d)**

Obtained as a pale yellow oil in 81% yield (134 mg).  $R_f$  (*n*-pentane/dichloroethane = 5:1) = 0.40.  $^1\text{H}$  NMR (400 MHz,  $\text{CDCl}_3$ ):  $\delta$  7.71 (d,  $J$  = 7.7 Hz, 1H), 7.59 (d,  $J$  = 7.7 Hz, 1H), 7.51 – 7.39 (m, 2H), 7.38 – 7.21 (m, 4H), 6.37 (q,  $J$  = 7.8 Hz, 1H), 2.58 (s, 3H), 2.40 (s, 3H).  $^{13}\text{C}$  NMR (101 MHz,  $\text{CDCl}_3$ ):  $\delta$  194.4 (s), 193.0 (s), 150.1 (q,  $J$  = 4.5 Hz), 140.9 (s), 138.3 (s), 135.4 (s), 134.3 (s), 133.2 (s), 132.4 (s), 132.2 (s), 132.1 (s), 131.7 (s), 129.6 (s), 126.7 (q,  $J$  = 36.3 Hz), 125.9 (s), 125.6 (s), 121.9 (q,  $J$  = 272.5 Hz), 21.5 (s), 20.1 (s).  $^{19}\text{F}$  NMR (376 MHz,  $\text{CDCl}_3$ ):  $\delta$  -60.1 (d,  $J$  = 7.8 Hz, 3F). IR (KBr):  $\nu$  2970, 1665, 1600, 1571, 1275, 1244, 1162, 1129, 1069, 974, 884, 858, 835, 597, 459  $\text{cm}^{-1}$ . HR-MS (ESI):  $m/z$  calcd. for  $\text{C}_{19}\text{H}_{16}\text{F}_3\text{O}_2$   $[\text{M}+\text{H}]^+$ : 333.1103; found: 333.1097.

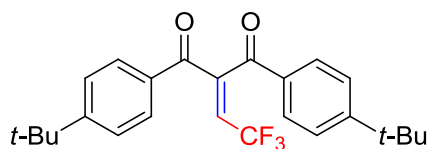

**1,3-Bis(4-(*tert*-butyl)phenyl)-2-(2,2,2-trifluoroethylidene)propane-1,3-dione (3e)**

Obtained as a pale yellow oil in 82% yield (170 mg).  $R_f$  (*n*-pentane/dichloroethane = 5:1) = 0.60.  $^1\text{H}$  NMR (400 MHz,  $\text{CDCl}_3$ ):  $\delta$  8.11 – 7.91 (m, 4H), 7.62 – 7.48 (m, 4H), 6.30 (q,  $J$  = 7.5 Hz, 1H), 1.37 (s, 9H), 1.36 (s, 9H).  $^{13}\text{C}$  NMR (101 MHz,  $\text{CDCl}_3$ ):  $\delta$  190.6 (s), 190.4 (s), 158.6 (s), 158.5 (s), 149.7 (q,  $J$  = 4.6 Hz), 132.7 (s), 132.3 (s), 130.4 (s), 129.9 (s), 126.0 (s), 125.9 (s), 123.7 (q,  $J$  = 36.2 Hz), 121.5 (q,  $J$  = 272.6 Hz), 35.3 (s), 31.0 (s).  $^{19}\text{F}$  NMR (376 MHz,  $\text{CDCl}_3$ ):  $\delta$  -60.1 (d,  $J$  = 7.5 Hz, 3F). IR (KBr):  $\nu$  3062, 2965, 2870, 2258, 1659, 1602, 1565, 1463, 1344, 1259, 1159, 1134, 1108, 1069, 983, 873, 843, 569  $\text{cm}^{-1}$ . HR-MS (EI):  $m/z$  calcd. for  $\text{C}_{25}\text{H}_{27}\text{F}_3\text{O}_2$ : 416.1963; found: 416.1958.

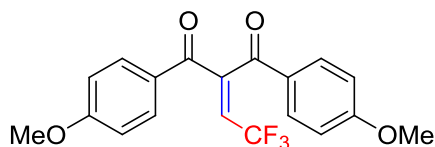

**1,3-Bis(4-methoxyphenyl)-2-(2,2,2-trifluoroethylidene)propane-1,3-dione (3f)**

Obtained as a pale yellow solid in 77% yield (140 mg). M.p. 97–99 °C.  $R_f$  (*n*-pentane/dichloroethane = 5:1) = 0.30.  $^1\text{H}$  NMR (400 MHz,  $\text{CDCl}_3$ ):  $\delta$  8.05 (d,  $J$  = 8.0 Hz, 2H), 8.01 (d,  $J$  = 8.0 Hz, 2H), 7.07 – 6.90 (m, 4H), 6.19 (q,  $J$  = 7.2 Hz, 1H), 3.90 (s, 6H).  $^{13}\text{C}$  NMR (101 MHz,  $\text{CDCl}_3$ ):  $\delta$  189.3 (s), 189.2 (s), 164.8 (s), 164.7 (s), 150.5 (q,  $J$  = 5.0 Hz), 133.1 (s), 132.5 (s), 128.4 (s), 127.7 (s), 122.5 (q,  $J$  = 36.1 Hz), 121.8 (q,  $J$  = 272.5 Hz), 114.2 (s), 114.1 (s), 55.6 (s), 55.5 (s).  $^{19}\text{F}$  NMR (376 MHz,  $\text{CDCl}_3$ ):  $\delta$  -60.1 (d,  $J$  = 7.2 Hz, 3F). IR (KBr):  $\nu$  3011, 2840, 2255, 1652, 1595, 1572, 1509, 1459, 1307, 1252, 1153, 1072, 1026, 981, 887, 841, 790, 570, 512  $\text{cm}^{-1}$ . HR-MS (EI):  $m/z$  calcd. for  $\text{C}_{19}\text{H}_{15}\text{F}_3\text{O}_4$ : 364.0922; found: 364.0928.

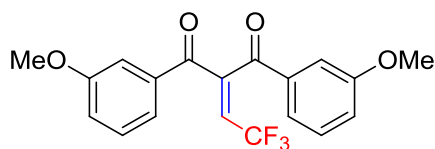

**1,3-Bis(3-methoxyphenyl)-2-(2,2,2-trifluoroethylidene)propane-1,3-dione (3g)**

Obtained as a pale yellow oil in 79% yield (143 mg).  $R_f$  (*n*-pentane/dichloroethane = 5:1) = 0.40.  $^1\text{H}$  NMR (400 MHz,  $\text{CDCl}_3$ )  $\delta$  7.66 – 7.50 (m, 3H), 7.47 (s, 1H), 7.45 – 7.35 (m, 2H), 7.17 (d,  $J$  = 7.9 Hz, 2H), 6.38 (q,  $J$  = 7.4 Hz, 1H), 3.83 (s, 6H).  $^{13}\text{C}$  NMR (101 MHz,  $\text{CDCl}_3$ )  $\delta$  190.7 (s), 190.6 (s), 160.0 (s), 159.9 (s), 149.0 (q,  $J$  = 4.6 Hz), 136.5 (s), 136.1 (s), 129.9 (s), 124.9 (q,  $J$  = 36.2 Hz), 123.0 (s), 122.9 (s), 121.7 (q,  $J$  = 272.6 Hz), 121.5 (s), 121.1 (s), 114.0 (s), 113.0 (s), 55.4 (s), 55.3 (s).  $^{19}\text{F}$  NMR (376 MHz,  $\text{CDCl}_3$ )  $\delta$  -60.1 (d,  $J$  = 7.4 Hz, 3F). IR (KBr):  $\nu$  3075, 3008, 2942, 2838, 2254, 1663, 1596, 1551, 1458, 1430, 1341, 1264, 1151, 1077, 1033, 878, 832, 680, 607, 558  $\text{cm}^{-1}$ . HR-MS (EI):  $m/z$  calcd. for  $\text{C}_{19}\text{H}_{15}\text{F}_3\text{O}_4$ : 364.0922; found: 364.0929.

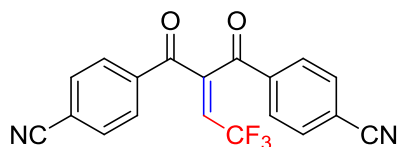

**4,4'-(2-(2,2,2-Trifluoroethylidene)malonyl)dibenzonitrile (3h)**

Obtained as a pale yellow solid in 50% yield (88 mg). M.p. 60–63 °C.  $R_f$  (*n*-pentane/dichloroethane = 5:1) = 0.40.  $^1\text{H}$  NMR (400 MHz,  $\text{CDCl}_3$ ):  $\delta$  8.08 (d,  $J$  = 8.2 Hz, 4H), 7.92 – 7.83 (m, 4H), 6.40 (q,  $J$  = 7.3 Hz, 1H).  $^{13}\text{C}$  NMR (101 MHz,  $\text{CDCl}_3$ ):  $\delta$  189.8 (s), 189.5 (s), 146.8 (q,  $J$  = 4.5 Hz), 137.7 (s), 137.6 (s), 132.9 (s), 132.8 (s), 130.5 (s), 130.0 (s), 126.3 (q,  $J$  = 36.7 Hz), 121.2 (q,  $J$  = 273.0 Hz), 118.1 (s), 118.0 (s), 117.5 (s), 117.4 (s).  $^{19}\text{F}$  NMR (376 MHz,  $\text{CDCl}_3$ ):  $\delta$  -60.1 (d,  $J$  = 7.3 Hz, 3F). IR (KBr):  $\nu$  3138, 2255, 1655, 1565, 1461, 1384, 1275, 1181, 1144, 1018, 884, 850, 590, 480  $\text{cm}^{-1}$ . HR-MS (ESI):  $m/z$  calcd. for  $\text{C}_{19}\text{H}_{10}\text{F}_3\text{N}_2\text{O}_2$   $[\text{M}+\text{H}]^+$ : 355.0695; found: 355.0698.

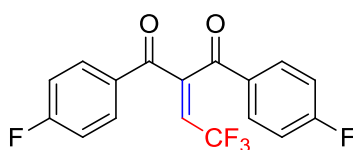

**1,3-Bis(4-fluorophenyl)-2-(2,2,2-trifluoroethylidene)propane-1,3-dione (3i)**

Obtained as a pale yellow solid in 79% yield (134 mg). Mp: 58–60 °C.  $R_f$  (*n*-pentane/dichloroethane = 5:1) = 0.30.  $^1\text{H}$  NMR (400 MHz,  $\text{CDCl}_3$ ):  $\delta$  8.19 – 7.98 (m, 4H), 7.29 – 7.11 (m, 4H), 6.29 (q,  $J$  = 7.5 Hz, 1H).  $^{13}\text{C}$  NMR (101 MHz,  $\text{CDCl}_3$ ):  $\delta$  189.3 (s), 189.2 (s), 167.9 (d,  $J$  = 4.4 Hz), 165.4 (d,  $J$  = 4.6 Hz), 148.9 (q,  $J$  = 4.6 Hz), 133.2 (d,  $J$  = 9.8 Hz), 132.7 (d,  $J$  = 9.9 Hz), 131.6 (s), 131.1 (d,  $J$  = 2.9 Hz), 123.9 (q,  $J$  = 36.4 Hz), 121.5 (q,  $J$  = 272.6 Hz), 116.4 (d,  $J$  = 6.0 Hz), 116.1 (d,  $J$  = 6.1 Hz).  $^{19}\text{F}$  NMR (376 MHz,  $\text{CDCl}_3$ ):  $\delta$  -60.2 (d,  $J$  = 7.5 Hz, 3F), -101.6 (tt,  $J$  = 8.3, 5.4 Hz, 1F), -101.8 (tt,  $J$  = 8.3, 5.4 Hz, 1F). IR (KBr):  $\nu$  3078, 2617, 1663, 1597, 1506, 1413, 1344, 1239, 1071, 1012, 983, 872, 864, 568, 505  $\text{cm}^{-1}$ . HR-MS (ESI):  $m/z$  calcd. for  $\text{C}_{17}\text{H}_{10}\text{F}_5\text{O}_2$   $[\text{M}+\text{H}]^+$ : 341.0599; found: 341.0595.

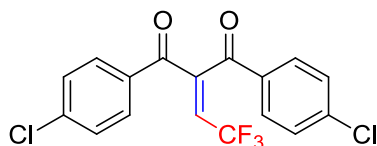

**1,3-Bis(4-chlorophenyl)-2-(2,2,2-trifluoroethylidene)propane-1,3-dione (3j)**

Obtained as a pale yellow oil in 72% yield (134 mg).  $R_f$  (*n*-pentane/dichloroethane = 5:1) = 0.50.  $^1\text{H}$  NMR (400 MHz,  $\text{CDCl}_3$ ):  $\delta$  8.05 – 7.87 (m, 4H), 7.60 – 7.45 (m, 4H), 6.31 (q,  $J$  = 7.4 Hz, 1H).  $^{13}\text{C}$  NMR (101 MHz,  $\text{CDCl}_3$ ):  $\delta$  189.7 (s), 189.6 (s), 148.4 (q,  $J$  = 4.6 Hz), 141.6 (s), 141.5 (s), 133.5 (s), 133.0 (s), 131.7 (s), 131.2 (s), 129.4 (s), 129.3 (s), 124.5 (q,  $J$  = 36.4 Hz), 121.5 (q,  $J$  = 272.7 Hz).  $^{19}\text{F}$  NMR (376 MHz,  $\text{CDCl}_3$ ):  $\delta$  -60.1 (d,  $J$  = 7.4 Hz, 3F). IR (KBr):  $\nu$  3065, 2257, 2200, 1662, 1586, 1487, 1401, 1343, 1252, 1160, 1090, 1012, 869, 838, 782, 534, 486  $\text{cm}^{-1}$ . HR-MS (ESI):  $m/z$  calcd. for  $\text{C}_{17}\text{H}_{10}\text{Cl}_2\text{F}_3\text{O}_2$   $[\text{M}+\text{H}]^+$ : 373.0009; found: 373.0004.

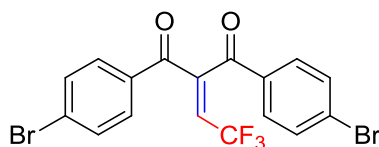

**1,3-Bis(4-bromophenyl)-2-(2,2,2-trifluoroethylidene)propane-1,3-dione (3k)**

Obtained as a pale yellow oil in 82% yield (189 mg).  $R_f$  (*n*-pentane/dichloroethane = 5:1) = 0.50.  $^1\text{H}$  NMR (400 MHz,  $\text{CDCl}_3$ ):  $\delta$  7.92 – 7.80 (m, 4H), 7.75 – 7.63 (m, 4H),

6.31 (q,  $J = 7.4$  Hz, 1H).  $^{13}\text{C}$  NMR (101 MHz,  $\text{CDCl}_3$ ):  $\delta$  189.9 (s), 189.8 (s), 148.3 (q,  $J = 4.6$  Hz), 133.8 (s), 133.4 (s), 132.4 (s), 132.3 (s), 131.8 (s), 131.2 (s), 130.5 (s), 130.4 (s), 124.7 (q,  $J = 36.4$  Hz), 121.5 (q,  $J = 272.7$  Hz).  $^{19}\text{F}$  NMR (376 MHz,  $\text{CDCl}_3$ ):  $\delta$  -60.1 (d,  $J = 7.4$  Hz, 3F). IR (KBr):  $\nu$  3066, 2924, 2205, 1668, 1565, 1470, 1422, 1353, 1275, 1241, 1158, 1138, 1068, 995, 793, 769, 672, 591, 454  $\text{cm}^{-1}$ . HR-MS (EI):  $m/z$  calcd. for  $\text{C}_{17}\text{H}_{10}\text{Br}_2\text{F}_3\text{O}_2$   $[\text{M}+\text{H}]^+$ : 462.8980; found: 462.8974.

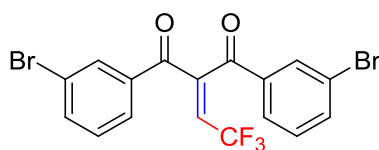

**1,3-Bis(3-bromophenyl)-2-(2,2,2-trifluoroethylidene)propane-1,3-dione (3l)**

Obtained as a pale yellow oil in 72% yield (166 mg).  $R_f$  ( $n$ -pentane/dichloroethane = 5:1) = 0.60.  $^1\text{H}$  NMR (400 MHz,  $\text{CDCl}_3$ ):  $\delta$  8.12 (s, 1H), 8.08 (s, 1H), 7.89 (t,  $J = 8.5$  Hz, 2H), 7.78 (t,  $J = 6.6$  Hz, 2H), 7.47 – 7.35 (m, 2H), 6.38 (q,  $J = 7.4$  Hz, 1H).  $^{13}\text{C}$  NMR (101 MHz,  $\text{CDCl}_3$ ):  $\delta$  189.7 (s), 189.5 (s), 147.5 (q,  $J = 4.5$  Hz), 137.6 (s), 137.4 (s), 136.8 (s), 136.4 (s), 132.7 (s), 132.2 (s), 130.5 (s), 130.4 (s), 128.9 (s), 128.6 (s), 125.6 (q,  $J = 36.5$  Hz), 123.4 (s), 123.3 (s), 121.4 (q,  $J = 272.8$  Hz).  $^{19}\text{F}$  NMR (376 MHz,  $\text{CDCl}_3$ ):  $\delta$  -60.0 (d,  $J = 7.4$  Hz, 3F). IR (KBr):  $\nu$  3066, 2924, 2205, 1668, 1565, 1470, 1422, 1353, 1275, 1241, 1158, 1138, 1068, 995, 793, 769, 672, 591, 454  $\text{cm}^{-1}$ . HR-MS (ESI):  $m/z$  calcd. for  $\text{C}_{17}\text{H}_{10}\text{Br}_2\text{F}_3\text{O}_2$   $[\text{M}+\text{H}]^+$ : 462.8980; found: 462.8974.

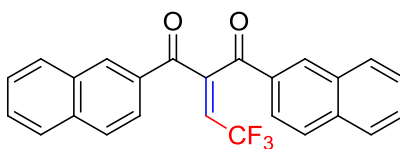

**1,3-Di(naphthalen-2-yl)-2-(2,2,2-trifluoroethylidene)propane-1,3-dione (3m)**

Obtained as a pale yellow oil solid in 89% yield (179 mg). M.p. 118–120  $^{\circ}\text{C}$ .  $R_f$  ( $n$ -pentane/dichloroethane = 5:1) = 0.40.  $^1\text{H}$  NMR (400 MHz,  $\text{CDCl}_3$ ):  $\delta$  8.66 (s, 1H), 8.59 (s, 1H), 8.14 – 8.00 (m, 4H), 7.99 – 7.87 (m, 4H), 7.73 – 7.55 (m, 4H), 6.47 (q,  $J = 7.5$  Hz, 1H).  $^{13}\text{C}$  NMR (101 MHz,  $\text{CDCl}_3$ ):  $\delta$  191.0 (s), 190.9 (s), 149.7 (q,  $J = 4.5$

Hz), 136.3 (s), 136.1 (s), 133.7 (s), 133.6 (s), 132.8 (s), 132.4 (s), 132.3 (s), 132.2 (s), 130.1 (s), 130.0 (s), 129.6 (s), 129.5 (s), 129.1 (s), 128.9 (s), 127.9 (s), 127.8 (s), 127.3 (s), 127.1 (s), 124.5 (s), 124.3 (q,  $J = 36.7$  Hz), 123.9 (s), 121.2 (q,  $J = 273.0$  Hz).  $^{19}\text{F}$  NMR (376 MHz,  $\text{CDCl}_3$ ):  $\delta$  -59.9 (d,  $J = 7.5$  Hz, 3F). IR (KBr):  $\nu$  2253, 1656, 1467, 1357, 1276, 1228, 1194, 1125, 824, 783, 562, 467  $\text{cm}^{-1}$ . HR-MS (EI):  $m/z$  calcd. for  $\text{C}_{25}\text{H}_{15}\text{F}_3\text{O}_2$ : 404.1024; found: 404.1026.

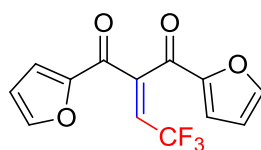

**1,3-Di(furan-2-yl)-2-(2,2,2-trifluoroethylidene)propane-1,3-dione (3n)**

Obtained as a pale yellow oil in 85% yield (120 mg).  $R_f$  ( $n$ -pentane/dichloroethane = 5:1) = 0.50.  $^1\text{H}$  NMR (400 MHz,  $\text{CDCl}_3$ ):  $\delta$  7.66 (s, 2H), 7.38 (d,  $J = 3.7$  Hz, 1H), 7.28 (d,  $J = 3.7$  Hz, 1H), 6.75 (q,  $J = 7.6$  Hz, 1H), 6.59 (dd,  $J = 3.4, 1.2$  Hz, 2H).  $^{13}\text{C}$  NMR (101 MHz,  $\text{CDCl}_3$ ):  $\delta$  177.6 (s), 175.5 (s), 151.5 (s), 150.6 (s), 148.7 (s), 148.5 (s), 145.5 (q,  $J = 4.6$  Hz), 127.2 (q,  $J = 36.5$  Hz), 122.5 (s), 121.6 (q,  $J = 272.4$  Hz), 121.1 (s), 113.2 (s), 113.1 (s).  $^{19}\text{F}$  NMR (376 MHz,  $\text{CDCl}_3$ ):  $\delta$  -59.9 (d,  $J = 7.6$  Hz, 3F). IR (KBr):  $\nu$  2265, 1655, 1461, 1394, 1343, 1229, 1181, 1144, 1097, 1018, 884, 766, 590, 480  $\text{cm}^{-1}$ . HR-MS (EI):  $m/z$  calcd. for  $\text{C}_{13}\text{H}_7\text{F}_3\text{O}_4$ : 284.0296; found: 284.0294.

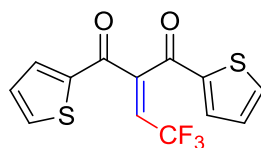

**1,3-Di(thiophen-2-yl)-2-(2,2,2-trifluoroethylidene)propane-1,3-dione (3o)**

Obtained as a pale yellow oil in 82% yield (129 mg).  $R_f$  ( $n$ -pentane/dichloroethane = 5:1) = 0.20.  $^1\text{H}$  NMR (400 MHz,  $\text{CDCl}_3$ ):  $\delta$  7.94 (d,  $J = 3.9$  Hz, 1H), 7.85 – 7.73 (m, 3H), 7.24 – 7.12 (m, 2H), 6.46 (q,  $J = 7.5$  Hz, 1H).  $^{13}\text{C}$  NMR (101 MHz,  $\text{CDCl}_3$ ):  $\delta$  182.2 (s), 181.4 (s), 148.3 (q,  $J = 4.7$  Hz), 142.4 (s), 141.3 (s), 137.3 (s), 137.0 (s), 136.9 (s), 136.7 (s), 128.9 (s), 128.8 (s), 124.4 (q,  $J = 36.4$  Hz), 121.5 (q,  $J = 272.6$

Hz).  $^{19}\text{F}$  NMR (376 MHz,  $\text{CDCl}_3$ ):  $\delta$  -60.1 (d,  $J$  = 7.5 Hz, 3F). IR (KBr):  $\nu$  3103, 1632, 1512, 1407, 1354, 1261, 1158, 1132, 1068, 1034, 912, 851, 610, 569, 476  $\text{cm}^{-1}$ . HR-MS (ESI):  $m/z$  calcd. for  $\text{C}_{13}\text{H}_7\text{F}_3\text{O}_2\text{S}_2$ : 315.9840; found: 315.9841.

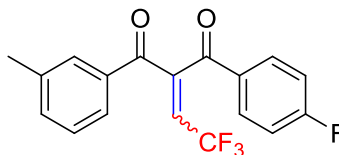

**1-(4-Fluorophenyl)-3-(*m*-tolyl)-2-(2,2,2-trifluoroethylidene)propane-1,3-dione**  
(3p)

Obtained as a pale yellow oil in 83% yield (139 mg).  $R_f$  (*n*-pentane/dichloroethane = 5:1) = 0.40.  $^1\text{H}$  NMR (400 MHz,  $\text{CDCl}_3$ ) *E* + *Z*:  $\delta$  8.15 – 7.97 (m, 2H), 7.91 – 7.71 (m, 2H), 7.57 – 7.36 (m, 2H), 7.21 (t,  $J$  = 7.6 Hz, 2H), 6.38 – 6.21 (m, 1H), 2.53 – 2.38 (m, 3H).  $^{13}\text{C}$  NMR (101 MHz,  $\text{CDCl}_3$ ) *E* + *Z*:  $\delta$  191.2 (s), 190.9 (s), 189.4 (s), 189.3 (s), 167.9 (s), 167.8 (s), 165.4 (s), 165.3 (s), 149.5 (q,  $J$  = 4.6 Hz), 148.8 (q,  $J$  = 4.7 Hz), 139.1 (s), 138.9 (s), 135.6 (s), 135.4 (s), 134.8 (s), 133.3 (s), 133.2 (s), 132.7 (s), 132.6 (s), 130.5 (s), 130.0 (s), 128.8 (s), 128.7 (d,  $J$  = 6.1 Hz), 127.7 (s), 127.5 (s), 124.4 (q,  $J$  = 36.5 Hz), 124.0 (q,  $J$  = 36.5 Hz), 121.6 (q,  $J$  = 273.5 Hz), 121.5 (q,  $J$  = 273.5 Hz), 116.4 (s), 116.3 (s), 116.2 (s), 116.1 (s), 21.3 (s), 21.2 (s).  $^{19}\text{F}$  NMR (376 MHz,  $\text{CDCl}_3$ ) *E* + *Z*:  $\delta$  -60.1 (t,  $J$  = 9.8 Hz), -101.8 – -102.0 (m), -102.1 (dd,  $J$  = 6.7, 5.0 Hz). IR (KBr):  $\nu$  3153, 2254, 1661, 1598, 1506, 1466, 1412, 1264, 1152, 848, 816, 576, 503  $\text{cm}^{-1}$ . HR-MS (EI):  $m/z$  calcd. for  $\text{C}_{18}\text{H}_{12}\text{F}_4\text{O}_2$ : 336.0773; found: 336.0777.

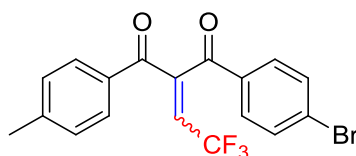

**1-(4-Bromophenyl)-3-(*p*-tolyl)-2-(2,2,2-trifluoroethylidene)propane-1,3-dione**  
(3q)

Obtained as a pale yellow oil in 85% yield (168 mg).  $R_f$  (*n*-pentane/dichloroethane = 5:1) = 0.40.  $^1\text{H}$  NMR (400 MHz,  $\text{CDCl}_3$ ) *E* + *Z*:  $\delta$  7.81 – 8.00 (m, 4H), 7.66 (d,  $J$  = 8.5 Hz, 2H), 7.32 (t,  $J$  = 7.3 Hz, 2H), 6.38 – 6.24 (m, 1H), 2.53 – 2.33 (m, 3H).  $^{13}\text{C}$



NMR (101 MHz, CDCl<sub>3</sub>) *E* + *Z*: δ 190.4(s), 190.2 (s), 190.1 (s), 190.0 (s), 149.1 (q, *J* = 4.6 Hz), 148.6 (q, *J* = 4.6 Hz), 146.2 (s), 146.1 (s), 134.0 (s), 133.6 (s), 132.7 (s), 132.3 (s), 132.2 (s), 132.1 (s), 131.7 (s), 131.2 (s), 130.5 (s), 130.2 (s), 130.1 (s), 130.0 (s), 129.7 (s), 129.6 (s), 124.3 (q, *J* = 36.2 Hz), 124.2 (q, *J* = 36.2 Hz), 121.6 (q, *J* = 272.6 Hz), 121.5 (q, *J* = 272.6 Hz), 21.9 (s), 21.8 (s). <sup>19</sup>F NMR (376 MHz, CDCl<sub>3</sub>) *E* + *Z*: δ -60.0 (d, *J* = 7.5 Hz, 3F), -60.1 (d, *J* = 7.5 Hz, 3F). IR (KBr): ν 3063, 2923, 2253, 2196, 1658, 1593, 1482, 1399, 1343, 1265, 1158, 1136, 1070, 1010, 979, 868, 828, 774, 575, 489 cm<sup>-1</sup>. HR-MS (EI): *m/z* calcd. for C<sub>18</sub>H<sub>12</sub>BrF<sub>3</sub>O<sub>2</sub>: 395.9973; found: 395.9976.

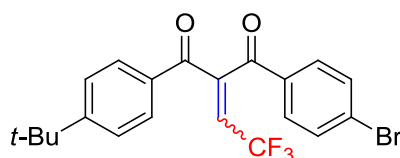

**1-(4-Bromophenyl)-3-(4-(tert-butyl)phenyl)-2-(2,2,2-trifluoroethylidene)propane-1,3-dione (3r)**

Obtained as a pale yellow oil in 75% yield (164 mg). *R<sub>f</sub>* (*n*-pentane/dichloroethane = 5:1) = 0.40. <sup>1</sup>H NMR (400 MHz, CDCl<sub>3</sub>) *E* + *Z*: δ 7.99 – 7.82 (m, 4H), 7.74 – 7.51 (m, 4H), 6.30 (qd, *J* = 7.4, 2.7 Hz, 1H), 1.45 – 1.33 (m, 9H). <sup>13</sup>C NMR (101 MHz, CDCl<sub>3</sub>) *E* + *Z*: δ 190.40 (s), 190.4 (s), 190.1 (s), 189.9 (s), 189.8 (s), 158.9 (s), 158.8 (s), 156.6 (s), 148.7 (q, *J* = 4.6 Hz), 148.6 (q, *J* = 4.6 Hz), 134.6 (s), 134.0 (s), 132.4 (s), 132.3 (s), 132.2 (s), 132.1 (s), 132.0 (d, *J* = 6.7 Hz), 131.9 (s), 131.7 (s), 131.3 (s), 131.2 (d, *J* = 4.3 Hz), 131.1 (s), 130.4 (s), 130.2 (s), 128.6 (s), 127.2 (s), 126.1 (s), 125.8 (s), 125.7 (d, *J* = 7.6 Hz), 124.4 (s), 124.2 (q, *J* = 36.3 Hz), 124.0 (s), 121.6 (q, *J* = 272.4 Hz), 35.4 (s), 35.1 (s), 31.1 (s), 31.0 (d, *J* = 14.3 Hz), 30.9 (s). <sup>19</sup>F NMR (376 MHz, CDCl<sub>3</sub>) *E* + *Z*: δ -60.2 (d, *J* = 7.5 Hz, 3F), -60.1 (d, *J* = 7.4 Hz, 3F). IR (KBr): ν 2965, 2253, 1661, 1584, 1483, 1399, 1261, 1162, 1011, 982, 841, 788, 626, 571, 542 cm<sup>-1</sup>. HR-MS (EI): *m/z* calcd. for C<sub>21</sub>H<sub>18</sub>BrF<sub>3</sub>O<sub>4</sub>: 438.0442; found: 438.0451.

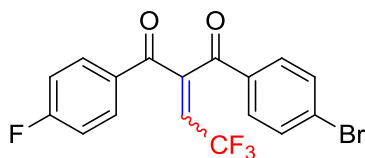

**1-(4-Bromophenyl)-3-(4-fluorophenyl)-2-(2,2,2-trifluoroethylidene)propane-1,3-dione (3s)**

Obtained as a pale yellow oil in 81% yield (162 mg).  $R_f$  (*n*-pentane/dichloroethane = 5:1) = 0.30.  $^1\text{H}$  NMR (400 MHz,  $\text{CDCl}_3$ ) *E* + *Z*:  $\delta$  8.19 – 7.95 (m, 2H), 7.86 (d,  $J$  = 7.1 Hz, 2H), 7.65 (d,  $J$  = 7.6 Hz, 2H), 7.29 – 7.09 (m, 2H), 6.39 – 6.22 (m, 1H).  $^{13}\text{C}$  NMR (101 MHz,  $\text{CDCl}_3$ ) *E* + *Z*:  $\delta$  190.0 (s), 189.8 (s), 189.2 (s), 189.1 (s), 167.9 (d,  $J$  = 4.6 Hz), 165.4 (d,  $J$  = 4.8 Hz), 148.6 (d,  $J$  = 4.3 Hz), 148.5 (d,  $J$  = 4.3 Hz), 133.9 (s), 133.4 (s), 133.2 (s), 133.1 (s), 132.7 (s), 132.6 (s), 132.3 (d,  $J$  = 2.8 Hz), 131.7 (s), 131.2 (s), 130.4 (s), 130.2 (s), 124.3 (q,  $J$  = 36.3 Hz), 124.2 (q,  $J$  = 36.3 Hz), 121.5 (q,  $J$  = 272.7 Hz).  $^{19}\text{F}$  NMR (376 MHz,  $\text{CDCl}_3$ ) *E* + *Z*:  $\delta$  -60.1 (d,  $J$  = 7.2 Hz, 3F), -60.2 (d,  $J$  = 6.5 Hz, 3F), -101.4 – -101.5 (m, 1F), -101.5 – -101.7 (m, 1F). IR (KBr):  $\nu$  3076, 2255, 1661, 1597, 1567, 1506, 1254, 1152, 1071, 982, 871, 838, 780, 575, 502  $\text{cm}^{-1}$ . HR-MS (EI):  $m/z$  calcd. for  $\text{C}_{17}\text{H}_9\text{BrF}_4\text{O}_2$ : 399.9722; found: 399.9727.

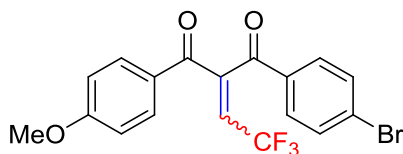

**1-(4-Bromophenyl)-3-(4-methoxyphenyl)-2-(2,2,2-trifluoroethylidene)propane-1,3-dione (3t)**

Obtained as a pale yellow oil in 80% yield (164 mg).  $R_f$  (*n*-pentane/dichloroethane = 5:1) = 0.50.  $^1\text{H}$  NMR (400 MHz,  $\text{CDCl}_3$ ) *E* + *Z*:  $\delta$  8.14 – 7.79 (m, 4H), 7.65 (d,  $J$  = 8.3 Hz, 2H), 7.07 – 6.92 (m, 2H), 6.34 – 6.19 (m, 1H), 3.95 – 3.80 (m, 3H).  $^{13}\text{C}$  NMR (101 MHz,  $\text{CDCl}_3$ ) *E* + *Z*:  $\delta$  190.2 (s), 190.1 (s), 188.8 (s), 188.7 (s), 164.9 (s), 164.8 (s), 149.4 (q,  $J$  = 4.6 Hz), 149.2 (q,  $J$  = 4.6 Hz), 134.0 (s), 133.6 (s), 133.0 (s), 132.4 (s), 132.2 (s), 131.7 (s), 131.3 (s), 130.2 (s), 130.0 (s), 129.4 (s), 128.5 (s), 128.3 (s), 127.4 (s), 123.9 (q,  $J$  = 36.3 Hz), 123.3 (q,  $J$  = 36.1 Hz), 121.7 (q,  $J$  = 272.6 Hz), 121.6 (q,  $J$  = 272.6 Hz), 114.3 (s), 114.2 (s), 55.6 (s), 55.5 (s).  $^{19}\text{F}$  NMR (376 MHz,

CDCl<sub>3</sub>) *E* + *Z*:  $\delta$  -60.0 (d, *J* = 7.4 Hz, 3F), -60.1 (d, *J* = 7.3 Hz, 3F). IR (KBr):  $\nu$  3061, 2964, 2255, 1645, 1595, 1509, 1482, 1345, 1251, 1155, 1070, 1010, 867, 839, 780, 573, 510 cm<sup>-1</sup>. HR-MS (EI): *m/z* calcd. for C<sub>18</sub>H<sub>12</sub>BrF<sub>3</sub>O<sub>3</sub>: 411.9922; found: 411.9923.

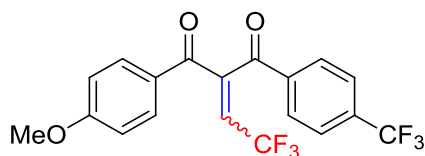

**1-(4-methoxyphenyl)-2-(2,2,2-trifluoroethylidene)-3-(4-(trifluoromethyl)phenyl)propane-1,3-dione (3u)**

Obtained as a pale yellow oil in 72% yield (144 mg). *R<sub>f</sub>* (*n*-pentane/dichloroethane = 5:1) = 0.60. <sup>1</sup>H NMR (400 MHz, CDCl<sub>3</sub>) *E* + *Z*:  $\delta$  8.22 – 8.08 (m, 2H), 8.07 – 7.90 (m, 2H), 7.79 (d, *J* = 8.0 Hz, 2H), 7.00 (t, *J* = 8.5 Hz, 2H), 6.38 – 6.23 (m, 1H), 3.95 – 3.87 (m, 3H). <sup>13</sup>C NMR (101 MHz, CDCl<sub>3</sub>) *E* + *Z*:  $\delta$  190.5 (s), 190.4 (s), 188.8 (s), 188.7 (s), 165.1 (s), 165.0 (s), 149.0 (q, *J* = 4.4 Hz), 148.8 (q, *J* = 4.6 Hz), 137.8 (s), 137.7 (s), 136.0 (s), 135.7 (s), 135.6 (s), 135.4 (s), 135.3 (s), 135.2 (s), 133.0 (s), 132.3 (s), 130.5 (s), 130.2 (s), 128.3 (s), 127.3 (s), 125.9 (q, *J* = 3.6 Hz), 124.7 (q, *J* = 36.7 Hz), 123.6 (q, *J* = 36.4 Hz), 123.8 (s), 123.5 (s), 121.6 (q, *J* = 272.0 Hz), 121.5 (q, *J* = 272.0 Hz), 114.4 (s), 114.3 (s), 55.6 (s), 55.5 (s). <sup>19</sup>F NMR (376 MHz, CDCl<sub>3</sub>) *E* + *Z*:  $\delta$  -60.1 (d, *J* = 7.4 Hz, 3F), -60.3 (d, *J* = 7.4 Hz, 3F), -63.3 (s, 3F), -63.4 (s, 3F). IR (KBr):  $\nu$  3067, 2963, 2844, 2188, 1661, 1657, 1596, 1573, 1462, 1410, 1323, 1254, 1129, 1065, 1016, 982, 870, 843, 798, 592, 511 m<sup>-1</sup>. HR-MS (ESI): *m/z* calcd. for C<sub>19</sub>H<sub>13</sub>F<sub>6</sub>O<sub>3</sub> [M+H]<sup>+</sup>: 403.0768; found: 403.0763.

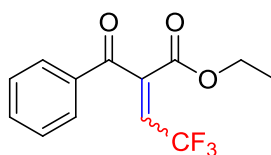

**Ethyl 2-benzoyl-4,4,4-trifluorobut-2-enoate (3v)**

Obtained as a pale yellow oil in 80% yield (108 mg). *R<sub>f</sub>* (*n*-pentane/dichloroethane = 5:1) = 0.30. <sup>1</sup>H NMR (400 MHz, CDCl<sub>3</sub>) *E* + *Z*:  $\delta$  7.89 (d, *J* = 7.5 Hz, 2H), 7.66 (t, *J* =

7.3 Hz, 1H), 7.53 (t,  $J = 7.5$  Hz, 2H), 7.00 (q,  $J = 7.8$  Hz, 1H), 4.27 (q,  $J = 7.0$  Hz, 2H), 1.22 (t,  $J = 7.1$  Hz, 3H).  $^{13}\text{C}$  NMR (101 MHz,  $\text{CDCl}_3$ )  $E + Z$ :  $\delta$  190.2 (s), 162.4 (s), 141.1 (q,  $J = 4.7$  Hz), 135.2 (s), 134.4 (s), 129.0 (s), 128.9 (s), 128.0 (q,  $J = 36.4$  Hz), 121.4 (q,  $J = 271.9$  Hz), 62.9 (s), 13.8 (s).  $^{19}\text{F}$  NMR (376 MHz,  $\text{CDCl}_3$ )  $E + Z$ :  $\delta$  -60.8 (d,  $J = 7.8$  Hz, 3F). IR (KBr):  $\nu$  2985, 2254, 2161, 1732, 1687, 1598, 1450, 1350, 1278, 1253, 1141, 1063, 689, 593, 501  $\text{cm}^{-1}$ . DART-HRMS  $m/z$ : calcd. for  $\text{C}_{13}\text{H}_{12}\text{F}_3\text{O}_3$   $[\text{M}+\text{H}]^+$ : 273.0733; found: 273.0732.

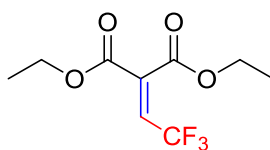

**Diethyl 2-(2,2,2-trifluoroethylidene)malonate (3w)**

Obtained as a pale yellow oil in 74% yield (88 mg).  $R_f$  ( $n$ -pentane/dichloroethane = 5:1) = 0.60.  $^1\text{H}$  NMR (400 MHz,  $\text{CDCl}_3$ ):  $\delta$  6.75 (q,  $J = 7.5$  Hz, 1H), 4.32 (dq,  $J = 13.9, 7.1$  Hz, 4H), 1.31 (t,  $J = 7.0$  Hz, 6H).  $^{13}\text{C}$  NMR (101 MHz,  $\text{CDCl}_3$ ):  $\delta$  162.5 (s), 161.4 (s), 135.6 (q,  $J = 5.0$  Hz), 127.7 (q,  $J = 36.7$  Hz), 121.2 (q,  $J = 271.4$  Hz), 62.8 (s), 62.4 (s), 13.8 (s), 13.7 (s).  $^{19}\text{F}$  NMR (376 MHz,  $\text{CDCl}_3$ ):  $\delta$  -62.5 (d,  $J = 7.6$  Hz, 3F). IR (KBr):  $\nu$  2987, 2943, 1739, 1673, 1468, 1394, 1375, 1349, 1281, 1252, 1234, 1137, 1096, 1053, 1018, 1003, 868, 796, 760, 660, 619, 546, 507  $\text{cm}^{-1}$ . DART-HRMS  $m/z$ : calcd. for  $\text{C}_9\text{H}_{12}\text{F}_3\text{O}_4$   $[\text{M}+\text{H}]^+$ : 241.0688; found: 241.0682.

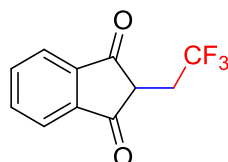

**2-(2,2,2-Trifluoroethyl)-1H-indene-1,3(2H)-dione (3x)**

Obtained as a pale yellow solid in 60% yield (68 mg). M.p. 138–140  $^{\circ}\text{C}$ .  $R_f$  ( $n$ -pentane/dichloroethane = 2:1) = 0.20.  $^1\text{H}$  NMR (400 MHz,  $\text{CDCl}_3$ ):  $\delta$  8.07 – 7.96 (m, 2H), 7.93 – 7.86 (m, 2H), 3.31 (t,  $J = 5.1$  Hz, 1H), 2.81 (qd,  $J = 10.8, 5.2$  Hz, 2H).  $^{13}\text{C}$  NMR (101 MHz,  $\text{CDCl}_3$ ):  $\delta$  196.7 (s), 141.7 (s), 136.1 (s), 125.8 (q,  $J = 277.4$  Hz), 123.6 (s), 48.4 (q,  $J = 2.1$  Hz), 29.8 (q,  $J = 31.1$  Hz).  $^{19}\text{F}$  NMR (376 MHz,  $\text{CDCl}_3$ ):  $\delta$

-63.5 (t,  $J = 10.8$  Hz, 3F). IR (KBr):  $\nu$  3458, 2956, 2894, 2050, 1980, 1757, 1706, 1603, 1424, 1392, 1346, 1262, 1219, 1100, 967, 868, 798, 699, 599, 518  $\text{cm}^{-1}$ . HR-MS (EI):  $m/z$  calcd. for  $\text{C}_{11}\text{H}_7\text{F}_3\text{O}_2$ : 228.0398; found: 228.0402.

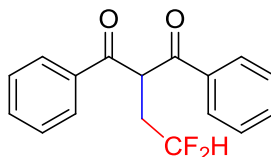

**2-(2,2-Difluoroethyl)-1,3-diphenylpropane-1,3-dione (4a)**

Obtained as a pale yellow oil in 30% yield (43 mg).  $R_f$  ( $n$ -pentane/dichloroethane = 2:1) = 0.30.  $^1\text{H}$  NMR (400 MHz,  $\text{CDCl}_3$ ):  $\delta$  8.01 (d,  $J = 7.7$  Hz, 4H), 7.62 (t,  $J = 7.3$  Hz, 2H), 7.50 (t,  $J = 7.4$  Hz, 4H), 6.06 (t,  $J = 56.7$  Hz, 1H), 5.58 (t,  $J = 6.4$  Hz, 1H), 2.70 (tt,  $J = 16.7, 4.5$  Hz, 2H).  $^{13}\text{C}$  NMR (101 MHz,  $\text{CDCl}_3$ ):  $\delta$  194.7 (s), 135.2 (s), 134.0 (s), 129.1 (s), 128.7 (s), 115.7 (t,  $J = 239.6$  Hz), 50.1 (t,  $J = 4.3$  Hz), 33.4 (t,  $J = 22.4$  Hz).  $^{19}\text{F}$  NMR (376 MHz,  $\text{CDCl}_3$ ):  $\delta$  -115.9 (dt,  $J = 56.7, 17.0$  Hz, 2F). IR (KBr):  $\nu$  3065, 2935, 2253, 1697, 1677, 1596, 1448, 1364, 1270, 1181, 1069, 984, 704, 691, 601, 509  $\text{cm}^{-1}$ . DART-HRMS  $m/z$ : calcd. for  $\text{C}_{17}\text{H}_{15}\text{F}_2\text{O}_2$   $[\text{M}+\text{H}]^+$ : 289.1036; found: 229.1034.

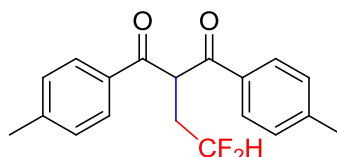

**2-(2,2-Difluoroethyl)-1,3-di-*p*-tolylpropane-1,3-dione (4b)**

Obtained as a pale yellow solid in 22% yield (34 mg). Mp: 110-112  $^{\circ}\text{C}$ .  $R_f$  ( $n$ -pentane/dichloroethane = 2:1) = 0.40.  $^1\text{H}$  NMR (400 MHz,  $\text{CDCl}_3$ ):  $\delta$  7.90 (d,  $J = 7.4$  Hz, 4H), 7.28 (d,  $J = 7.4$  Hz, 4H), 6.03 (t,  $J = 56.7$  Hz, 1H), 5.48 (t,  $J = 6.3$  Hz, 1H), 2.67 (tt,  $J = 16.8, 3.2$  Hz, 2H), 2.43 (s, 6H).  $^{13}\text{C}$  NMR (101 MHz,  $\text{CDCl}_3$ ):  $\delta$  194.3 (s), 145.0 (s), 132.8 (s), 129.8 (s), 128.8 (s), 115.8 (t,  $J = 239.5$  Hz), 50.0 (t,  $J = 4.3$  Hz), 33.6 (t,  $J = 22.4$  Hz), 21.7 (s).  $^{19}\text{F}$  NMR (376 MHz,  $\text{CDCl}_3$ ):  $\delta$  -116.0 (dt,  $J = 56.7, 16.8$  Hz, 2F). IR (KBr):  $\nu$  3032, 2923, 1690, 1672, 1605, 1571, 1509, 1407,

1321, 1271, 1179, 1118, 1039, 980, 816, 789, 587, 509  $\text{cm}^{-1}$ . DART-HRMS  $m/z$ : calcd. for  $\text{C}_{19}\text{H}_{19}\text{F}_2\text{O}_2$ :  $[\text{M}+\text{H}]^+$ : 317.1348; found: 317.1346.

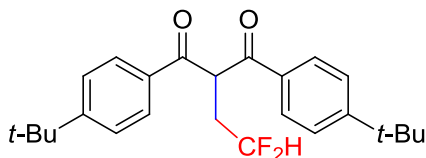

**1,3-Bis(4-(tert-butyl)phenyl)-2-(2,2-difluoroethyl)propane-1,3-dione (4e)**

Obtained as a pale yellow oil in 22% yield (44mg).  $R_f$  ( $n$ -pentane/dichloroethane = 2:1) = 0.40.  $^1\text{H}$  NMR (400 MHz,  $\text{CDCl}_3$ ):  $\delta$  7.97 (d,  $J$  = 7.6 Hz, 4H), 7.52 (d,  $J$  = 7.6 Hz, 4H), 6.03 (t,  $J$  = 56.7 Hz, 1H), 5.53 (t,  $J$  = 6.4 Hz, 1H), 2.68 (tt,  $J$  = 16.8, 5.2 Hz, 2H), 1.36 (s, 18H).  $^{13}\text{C}$  NMR (101 MHz,  $\text{CDCl}_3$ ):  $\delta$  194.3 (s), 157.9 (s), 132.6 (s), 128.7 (s), 126.1 (s), 115.9 (t,  $J$  = 239.5 Hz), 50.0 (t,  $J$  = 4.4 Hz), 35.2 (s), 33.5 (t,  $J$  = 22.5 Hz), 31.0 (s).  $^{19}\text{F}$  NMR (376 MHz,  $\text{CDCl}_3$ ):  $\delta$  -116.0 (dt,  $J$  = 56.7, 16.8 Hz, 2F). IR (KBr):  $\nu$  2965, 2870, 1691, 1603, 1564, 1463, 1407, 1364, 1321, 1269, 1189, 1108, 1073, 1041, 986, 961, 621, 546, 508  $\text{cm}^{-1}$ . DART-HRMS  $m/z$ : calcd. for  $\text{C}_{25}\text{H}_{31}\text{F}_2\text{O}_2$   $[\text{M}+\text{H}]^+$ : 401.2287; found: 401.2286.

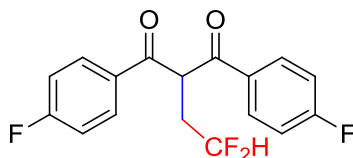

**2-(2,2-difluoroethyl)-1,3-bis(4-fluorophenyl)propane-1,3-dione (4i)**

Obtained as a pale yellow oil in 20% yield (32 mg).  $R_f$  ( $n$ -pentane/dichloroethane = 2:1) = 0.40.  $^1\text{H}$  NMR (400 MHz,  $\text{CDCl}_3$ ):  $\delta$  8.12 – 7.88 (m, 4H), 7.16 (t,  $J$  = 8.1 Hz, 4H), 6.03 (tt,  $J$  = 56.6, 3.8 Hz, 1H), 5.44 (t,  $J$  = 6.5 Hz, 1H), 2.68 (tt,  $J$  = 17.2, 5.2 Hz, 2H).  $^{13}\text{C}$  NMR (101 MHz,  $\text{CDCl}_3$ ):  $\delta$  192.9 (s), 167.5 (s), 165.0 (s), 131.4 (d,  $J$  = 9.6 Hz), 116.4 (d,  $J$  = 22.1 Hz), 115.6 (t,  $J$  = 239.7 Hz), 50.1 (t,  $J$  = 4.2 Hz), 33.4 (t,  $J$  = 22.3 Hz).  $^{19}\text{F}$  NMR (376 MHz,  $\text{CDCl}_3$ ):  $\delta$  -102.9 – -103.0 (m, 2F), -116.1 (dt,  $J$  = 56.6, 17.2 Hz, 2F). IR (KBr):  $\nu$  3078, 2924, 2853, 1696, 1675, 1596, 1507, 1409, 1346, 1320, 1270, 1238, 1157, 1118, 1071, 1040, 986, 961, 845, 811, 600, 586  $\text{cm}^{-1}$ . DART-HRMS  $m/z$ : calcd. for  $\text{C}_{17}\text{H}_{13}\text{F}_4\text{O}_2$   $[\text{M}+\text{H}]^+$ : 325.0852; found: 325.0846.

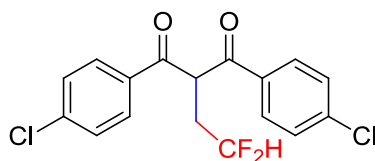

**1,3-Bis(4-chlorophenyl)-2-(2,2-difluoroethyl)propane-1,3-dione (4j)**

Obtained as a pale yellow oil in 21% yield (37 mg).  $R_f$  (*n*-pentane/dichloroethane = 2:1) = 0.50.  $^1\text{H}$  NMR (400 MHz,  $\text{CDCl}_3$ ):  $\delta$  7.91 (d,  $J$  = 8.2 Hz, 4H), 7.48 (d,  $J$  = 8.2 Hz, 4H), 6.03 (tt,  $J$  = 56.5, 3.7 Hz, 1H), 5.42 (t,  $J$  = 6.5 Hz, 1H), 2.68 (tt,  $J$  = 17.2, 5.6 Hz, 2H).  $^{13}\text{C}$  NMR (101 MHz,  $\text{CDCl}_3$ ):  $\delta$  193.2 (s), 140.8 (s), 133.4 (s), 130.0 (s), 129.5 (s), 115.5 (t,  $J$  = 239.8 Hz), 50.1 (t,  $J$  = 4.1 Hz), 33.3 (t,  $J$  = 22.2 Hz).  $^{19}\text{F}$  NMR (376 MHz,  $\text{CDCl}_3$ ):  $\delta$  -116.1 (dt,  $J$  = 56.6, 17.2 Hz, 2F). IR (KBr):  $\nu$  3093, 2925, 2853, 1697, 1588, 1569, 1400, 1320, 1270, 1119, 1092, 1072, 907, 840, 817, 628, 611, 537  $\text{cm}^{-1}$ . DART-HRMS  $m/z$ : calcd. for  $\text{C}_{17}\text{H}_{13}\text{Cl}_2\text{F}_2\text{O}_2$   $[\text{M}+\text{H}]^+$ : 357.0261; found: 357.0255.

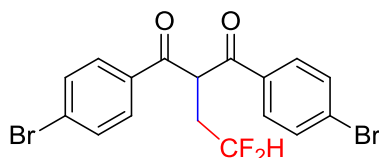

**1,3-Bis(4-bromophenyl)-2-(2,2-difluoroethyl)propane-1,3-dione (4k)**

Obtained as a pale yellow solid in 20% yield (44 mg). Mp: 130–132 °C.  $R_f$  (*n*-pentane/dichloroethane = 2:1) = 0.30.  $^1\text{H}$  NMR (400 MHz,  $\text{CDCl}_3$ ):  $\delta$  7.82 (d,  $J$  = 7.9 Hz, 4H), 7.63 (d,  $J$  = 7.9 Hz, 4H), 6.03 (tt,  $J$  = 56.6, 3.6 Hz, 1H), 5.41 (t,  $J$  = 6.5 Hz, 1H), 2.67 (tt,  $J$  = 17.2, 5.6 Hz, 2H).  $^{13}\text{C}$  NMR (101 MHz,  $\text{CDCl}_3$ ):  $\delta$  193.4 (s), 133.8 (s), 132.5 (s), 130.1 (s), 129.6 (s), 115.5 (t,  $J$  = 239.8 Hz), 50.0 (t,  $J$  = 4.1 Hz), 33.3 (t,  $J$  = 22.2 Hz).  $^{19}\text{F}$  NMR (376 MHz,  $\text{CDCl}_3$ ):  $\delta$  -116.0 (dt,  $J$  = 56.6, 17.2 Hz, 2F). IR (KBr):  $\nu$  3091, 2940, 1697, 1676, 1584, 1566, 1396, 1364, 1320, 1249, 1195, 1178, 1118, 1071, 1041, 1009, 985, 960, 837, 814, 605, 520  $\text{cm}^{-1}$ . DART-HRMS  $m/z$ : calcd. for  $\text{C}_{17}\text{H}_{13}\text{Br}_2\text{F}_2\text{O}_2$   $[\text{M}+\text{H}]^+$ : 444.9245; found: 444.9245.

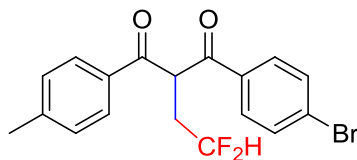

**1-(4-Bromophenyl)-2-(2,2-difluoroethyl)-3-(*p*-tolyl)propane-1,3-dione (4q)**

Obtained as a pale yellow solid in 32% yield (60 mg). Mp: 130–132 °C.  $R_f$  (*n*-pentane/dichloroethane = 2:1) = 0.30.  $^1\text{H}$  NMR (400 MHz,  $\text{CDCl}_3$ ):  $\delta$  7.89 (d,  $J$  = 7.5 Hz, 2H), 7.82 (d,  $J$  = 7.6 Hz, 2H), 7.61 (d,  $J$  = 7.7 Hz, 2H), 7.30 (d,  $J$  = 7.8 Hz, 2H), 6.03 (tt,  $J$  = 56.7, 3.8 Hz, 1H), 5.45 (t,  $J$  = 6.5 Hz, 1H), 2.82 – 2.52 (m, 2H), 2.44 (s, 3H).  $^{13}\text{C}$  NMR (101 MHz,  $\text{CDCl}_3$ ):  $\delta$  194.1 (s), 193.7 (s), 145.4 (s), 134.1 (s), 132.5 (s), 132.4 (s), 130.1 (s), 129.9 (s), 129.2 (s), 128.9 (s), 115.7 (t,  $J$  = 239.6 Hz), 50.0 (t,  $J$  = 4.2 Hz), 33.4 (t,  $J$  = 22.3 Hz), 21.7 (s).  $^{19}\text{F}$  NMR (376 MHz,  $\text{CDCl}_3$ ):  $\delta$  -115.1 (dt,  $J$  = 56.6, 16.8 Hz, 2F), -115.9 (dt,  $J$  = 55.4, 16.2 Hz, 2F), -116.1 (dt,  $J$  = 34.7, 16.5 Hz, 2F), -116.9 (dt,  $J$  = 56.7, 17.3 Hz, 2F). IR (KBr):  $\nu$  2923, 2852, 1694, 1673, 1605, 1585, 1484, 1397, 1321, 1270, 1179, 1118, 1070, 1042, 1010, 984, 960, 813, 626, 588, 518  $\text{cm}^{-1}$ . DART-HRMS  $m/z$ : calcd. for  $\text{C}_{18}\text{H}_{16}\text{BrF}_2\text{O}_2$   $[\text{M}+\text{H}]^+$ : 381.0302; found: 381.0296.

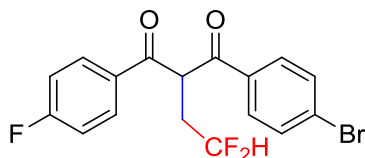

**1-(4-Bromophenyl)-2-(2,2-difluoroethyl)-3-(4-fluorophenyl)propane-1,3-dione (4s)**

Obtained as a pale yellow oil in 21% yield (40 mg).  $R_f$  (*n*-pentane/dichloroethane = 2:1) = 0.40.  $^1\text{H}$  NMR (400 MHz,  $\text{CDCl}_3$ ):  $\delta$  8.06 – 7.94 (m, 2H), 7.83 (d,  $J$  = 7.5 Hz, 2H), 7.64 (d,  $J$  = 7.5 Hz, 2H), 7.18 (t,  $J$  = 8.0 Hz, 2H), 6.03 (tt,  $J$  = 56.7, 3.5 Hz, 1H), 5.42 (t,  $J$  = 6.4 Hz, 1H), 2.68 (tt,  $J$  = 17.2, 5.6 Hz, 2H).  $^{13}\text{C}$  NMR (101 MHz,  $\text{CDCl}_3$ ):  $\delta$  193.5 (s), 192.8 (s), 166.3 (d,  $J$  = 257.2 Hz), 133.9 (s), 132.5 (s), 131.5 (s), 131.4 (s), 130.1 (s), 129.5 (s), 116.4 (d,  $J$  = 22.1 Hz), 115.5 (t,  $J$  = 239.7 Hz), 50.1 (t,  $J$  = 4.2 Hz), 33.3 (t,  $J$  = 22.2 Hz).  $^{19}\text{F}$  NMR (376 MHz,  $\text{CDCl}_3$ ):  $\delta$  -102.7 – -102.9 (m, 1F), -116.1 (dtd,  $J$  = 56.7, 17.2, 3.3 Hz, 2F). IR (KBr):  $\nu$  3076, 2925, 2853, 1695, 1674,



1584, 1567, 1507, 1485, 1430, 1397, 1364, 1320, 1303, 1270, 1238, 1193, 1180, 1157, 1118, 1070, 1040, 984, 960, 842, 744, 681, 587, 508  $\text{cm}^{-1}$ . DART-HRMS  $m/z$ : calcd. for  $\text{C}_{17}\text{H}_{13}\text{BrF}_3\text{O}_2$   $[\text{M}+\text{H}]^+$ : 385.0051; found: 385.0045.

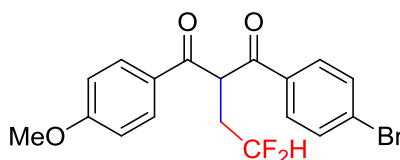

**1-(4-Bromophenyl)-2-(2,2-difluoroethyl)-3-(4-methoxyphenyl)propane-1,3-dione**  
(4t)

Obtained as a pale yellow oil in 30% yield (59 mg).  $R_f$  ( $n$ -pentane/dichloroethane = 2:1) = 0.40.  $^1\text{H}$  NMR (400 MHz,  $\text{CDCl}_3$ ):  $\delta$  7.98 (d,  $J$  = 7.8 Hz, 2H), 7.82 (d,  $J$  = 7.6 Hz, 2H), 7.61 (d,  $J$  = 7.7 Hz, 2H), 6.98 (d,  $J$  = 7.8 Hz, 2H), 6.02 (t,  $J$  = 56.6 Hz, 1H), 5.40 (t,  $J$  = 6.0 Hz, 1H), 3.90 (s, 3H), 2.86 – 2.50 (m, 2H).  $^{13}\text{C}$  NMR (101 MHz,  $\text{CDCl}_3$ ):  $\delta$  193.7 (s), 192.8 (s), 164.4 (s), 134.2 (s), 132.3 (s), 131.2 (s), 130.0 (s), 129.2 (s), 127.8 (s), 115.7 (t,  $J$  = 239.6 Hz), 114.4 (s), 55.6 (s), 50.0 (t,  $J$  = 4.0 Hz), 33.5 (t,  $J$  = 22.3 Hz).  $^{19}\text{F}$  NMR (376 MHz,  $\text{CDCl}_3$ ):  $\delta$  -115.1 (dt,  $J$  = 56.7, 16.7 Hz, 2F), -115.8 (dt,  $J$  = 56.6, 16.7 Hz, 2F), -116.2 (dt,  $J$  = 56.8, 17.4 Hz, 2F), -117.0 (dt,  $J$  = 56.9, 17.4 Hz, 2F). IR (KBr):  $\nu$  3059, 2961, 2842, 1691, 1665, 1597, 1584, 1573, 1510, 1485, 1431, 1396, 1318, 1260, 1169, 1117, 1070, 1028, 983, 960, 839, 625, 590, 511  $\text{cm}^{-1}$ . DART-HRMS  $m/z$ : calcd. for  $\text{C}_{18}\text{H}_{16}\text{BrF}_2\text{O}_3$   $[\text{M}+\text{H}]^+$ : 397.0251; found: 397.0245.

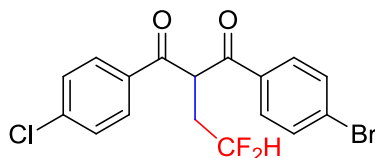

**1-(4-Bromophenyl)-3-(4-chlorophenyl)-2-(2,2-difluoroethyl)propane-1,3-dione**  
(4y)

Obtained as a pale yellow solid in 20% yield (40 mg). Mp: 112-113  $^{\circ}\text{C}$ .  $R_f$  ( $n$ -pentane/dichloroethane = 2:1) = 0.40.  $^1\text{H}$  NMR (400 MHz,  $\text{CDCl}_3$ ):  $\delta$  7.91 (d,  $J$  = 7.6 Hz, 2H), 7.83 (d,  $J$  = 7.7 Hz, 2H), 7.65 (d,  $J$  = 7.5 Hz, 2H), 7.48 (d,  $J$  = 7.5 Hz,

2H), 6.03 (t,  $J = 55.2$  Hz, 1H), 5.41 (t,  $J = 5.6$  Hz, 1H), 2.68 (tt,  $J = 17.2, 2.8$  Hz, 2H).  $^{13}\text{C}$  NMR (101 MHz,  $\text{CDCl}_3$ ):  $\delta$  193.4 (s), 193.2 (s), 140.8 (s), 133.8 (s), 133.4 (s), 132.5 (s), 130.1 (s), 130.0 (s), 129.6 (s), 129.5 (s), 115.4 (t,  $J = 239.9$  Hz), 50.1 (t,  $J = 4.1$  Hz), 33.3 (t,  $J = 22.2$  Hz).  $^{19}\text{F}$  NMR (376 MHz,  $\text{CDCl}_3$ ):  $\delta$  -116.0 (dt,  $J = 56.6, 17.2$  Hz, 2F). IR (KBr):  $\nu$  3091, 2926, 2854, 2253, 1697, 1675, 1585, 1568, 1487, 1399, 1320, 1270, 1118, 1092, 1071, 1043, 986, 904, 856, 839, 816, 608, 536  $\text{cm}^{-1}$ . DART-HRMS  $m/z$ : calcd. for  $\text{C}_{17}\text{H}_{13}\text{BrClF}_2\text{O}_2$   $[\text{M}+\text{H}]^+$ : 400.9756; found: 400.9750.

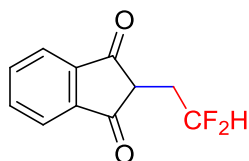

**2-(2,2-Difluoroethyl)-1H-indene-1,3(2H)-dione (4x)**

Obtained as a pale yellow solid in 20% yield (21 mg). Mp: 87–90 °C.  $R_f$  ( $n$ -pentane/dichloroethane = 3:1) = 0.30.  $^1\text{H}$  NMR (400 MHz,  $\text{CDCl}_3$ ):  $\delta$  8.07 – 7.97 (m, 2H), 7.93 – 7.86 (m, 2H), 6.29 (tt,  $J = 56.8, 4.3$  Hz, 1H), 3.27 (t,  $J = 6.4$  Hz, 1H), 2.44 (tt,  $J = 16.1, 5.6$  Hz, 2H).  $^{13}\text{C}$  NMR (101 MHz,  $\text{CDCl}_3$ ):  $\delta$  198.3 (s), 141.8 (s), 136.0 (s), 123.5 (s), 115.0 (t,  $J = 240.0$  Hz), 48.5 (t,  $J = 5.3$  Hz), 30.6 (t,  $J = 23.7$  Hz).  $^{19}\text{F}$  NMR (376 MHz,  $\text{CDCl}_3$ ):  $\delta$  -116.4 (dt,  $J = 56.7, 16.1$  Hz, 2F). IR (KBr):  $\nu$  3447, 2936, 2254, 1751, 1711, 1600, 1401, 1347, 1282, 1201, 1119, 1075, 1043, 1014, 955, 904, 787, 601, 531  $\text{cm}^{-1}$ . HR-MS (EI):  $m/z$  calcd. for  $\text{C}_{11}\text{H}_8\text{F}_2\text{O}_2$ : 210.0492; found: 210.0486.

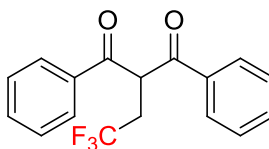

**1,3-Diphenyl-2-(2,2,2-trifluoroethyl)propane-1,3-dione (5)**

Obtained as a pale yellow oil in 78% yield (44 mg).  $^1\text{H}$  NMR (400 MHz,  $\text{CDCl}_3$ ):  $\delta$  7.98 (d,  $J = 7.8$  Hz, 4H), 7.62 (t,  $J = 7.4$  Hz, 2H), 7.49 (t,  $J = 7.3$  Hz, 4H), 5.62 (t,  $J = 6.0$  Hz, 1H), 3.07 (qd,  $J = 10.5, 6.7$  Hz, 2H).  $^{13}\text{C}$  NMR (101 MHz,  $\text{CDCl}_3$ ):  $\delta$  193.2 (s), 135.1 (s), 134.1 (s), 129.1 (s), 128.7 (s), 126.3 (q,  $J = 276.8$  Hz), 50.2 (s), 33.1 (q,  $J =$

29.9 Hz).  $^{19}\text{F}$  NMR (376 MHz,  $\text{CDCl}_3$ ):  $\delta$  -64.9 (t,  $J$  = 10.7 Hz, 3F). IR (KBr):  $\nu$  3065, 2961, 2258, 1700, 1677, 1596, 1581, 1448, 1336, 1257, 1112, 1000, 873, 785, 688,  $588\text{ cm}^{-1}$ . HR-MS (EI):  $m/z$  calcd. for  $\text{C}_{17}\text{H}_{13}\text{F}_3\text{O}_2$ : 306.0868; found: 306.0858.

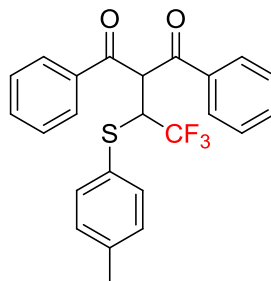

**1,3-Diphenyl-2-(2,2,2-trifluoro-1-(p-tolylthio)ethyl)propane-1,3-dione (6)**

Obtained as a red-brown solid in 80% yield (68 mg). Mp: 167–168 °C.  $^1\text{H}$  NMR (400 MHz,  $\text{CDCl}_3$ ):  $\delta$  8.05 (d,  $J$  = 7.6 Hz, 2H), 7.97 (d,  $J$  = 7.6 Hz, 2H), 7.70 – 7.36 (m, 8H), 7.15 (d,  $J$  = 7.3 Hz, 2H), 5.95 (d,  $J$  = 10.1 Hz, 1H), 4.89 – 4.71 (m, 1H), 2.36 (s, 3H).  $^{13}\text{C}$  NMR (101 MHz,  $\text{CDCl}_3$ ):  $\delta$  191.1 (s), 191.0 (s), 139.3 (s), 136.8 (s), 135.6 (s), 134.1 (s), 134.0 (s), 133.6 (s), 130.1 (s), 129.7 (s), 129.1 (s), 129.0 (s), 128.9 (s), 128.7 (s), 126.5 (q,  $J$  = 279.3 Hz), 54.7 (s), 53.0 (q,  $J$  = 28.6 Hz), 21.2 (s).  $^{19}\text{F}$  NMR (376 MHz,  $\text{CDCl}_3$ ):  $\delta$  -68.0 (d,  $J$  = 8.1 Hz, 3F). IR (KBr):  $\nu$  3063, 2254, 1701, 1675, 1596, 1492, 1448, 1292, 1247, 1176, 1101, 963, 810, 685, 595,  $574\text{ cm}^{-1}$ . HR-MS (EI):  $m/z$  calcd. for  $\text{C}_{24}\text{H}_{20}\text{F}_3\text{O}_2\text{S}$   $[\text{M}+\text{H}]^+$ : 429.1131; found: 429.1126.

## Crystal structure analyses

The suitable crystals of **3f** (CCDC 1837087), and **4k** (CCDC 1859309) were mounted on quartz fibers and X-ray data collected on a Bruker AXS APEX diffractometer, equipped with a CCD detector at -50 °C, using MoK $\alpha$  radiation ( $\lambda$  0.71073 Å). The data was corrected for Lorentz and polarisation effect with the **SMART** suite of programs and for absorption effects with SADABS.<sup>3</sup> Structure solution and refinement were carried out with the SHELXTL suite of programs.<sup>3</sup> The structure was solved by direct methods to locate the heavy atoms, followed by difference maps for the light non-hydrogen atoms.

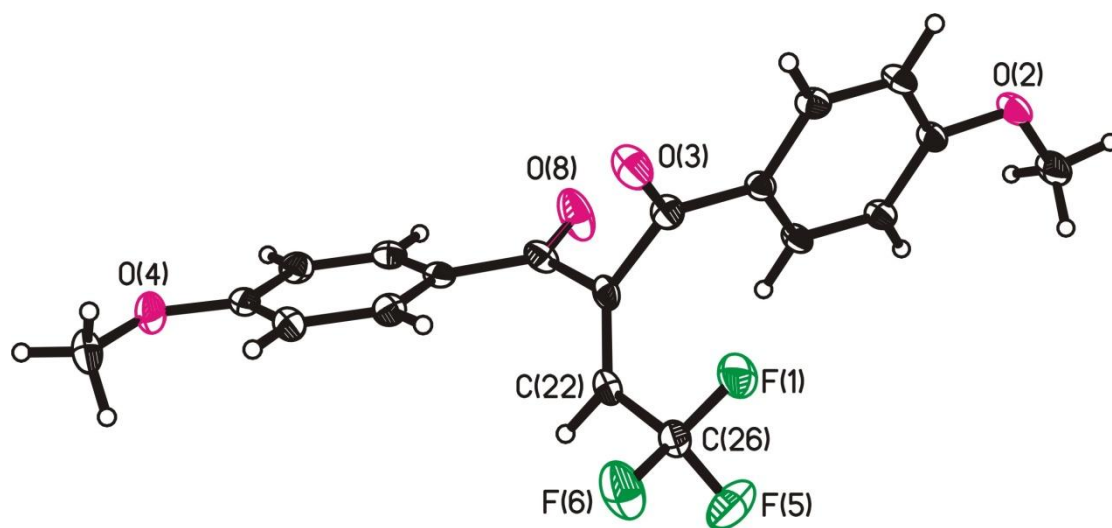

ORTEP diagrams of **3f**.

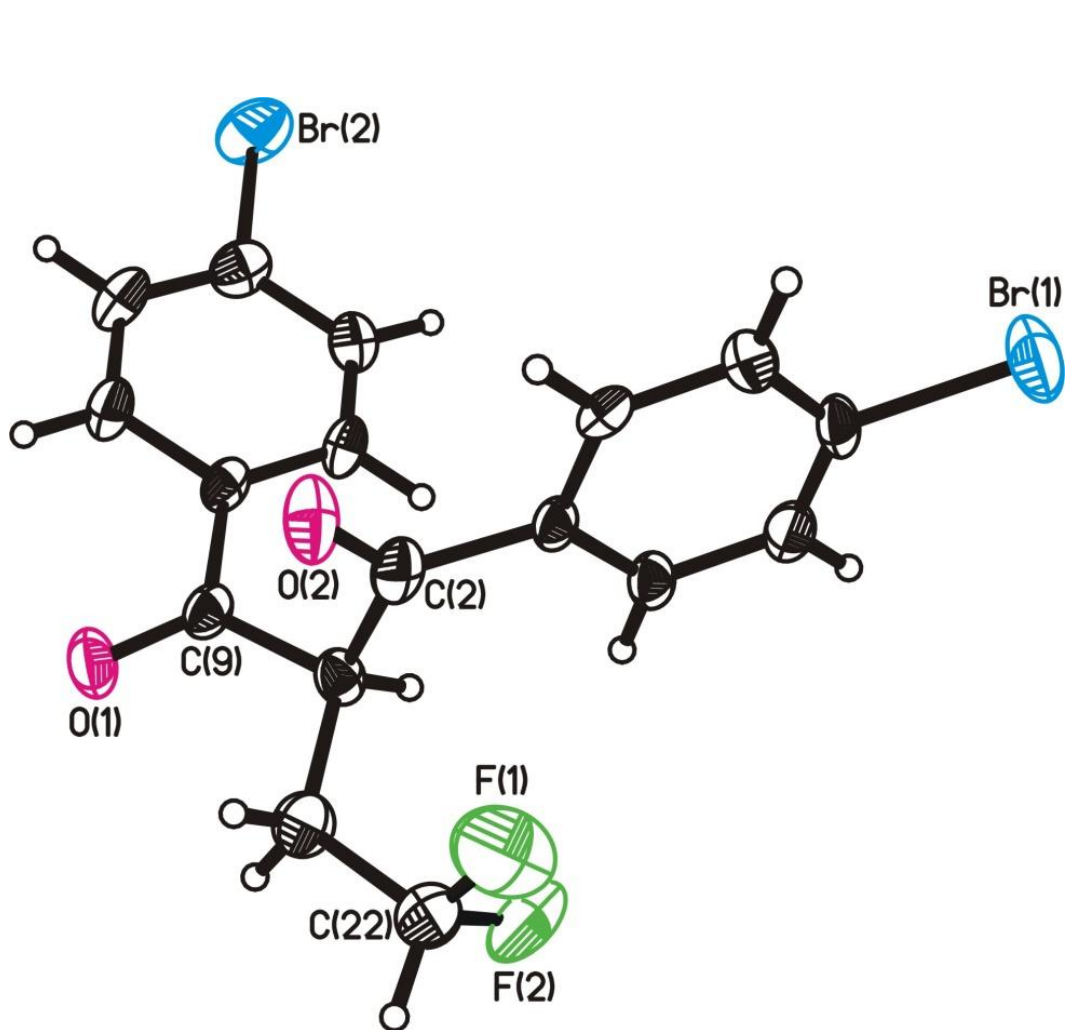

ORTEP diagrams of **4k**.

### **The procedure for the evaluation of fungicidal activities**

Each of the test compounds (4 mg) was first dissolved in 5 mL of mixture of acetone and methanol (1:1 by volume), and then 5 mL of water containing 0.1% Tween 80 was added to generate a 10 mL stock solution of 400 mg/L concentration.

Briefly, a whole plant is used in this test, and the testing solution is sprayed to the host plant by a special plant sprayer. The plant is inoculated with fungus after 24 h. According to the infecting characteristics of fungus, the plant is stored in a humidity chamber and then transferred into a greenhouse after infection is finished. The other plants are placed in a greenhouse directly. The activity of each compound was estimated by visual inspection after 4-7 days, and screening results were reported as a range from 0% (no control) to 100% (complete control).

## References:

- (1) Qian, J.; Yi, W.; Huang, X.; Jasinski, J. P.; Zhang, W. *Adv. Synth. Catal.* **2016**, 358, 2811.
- (2) Sun, X.; Lyu, Y.; Zhang-Negrerie, D.; Du, Y.; Zhao, K. *Org. Lett.* **2013**, 15, 6222.
- (3) SHELXTL version 5.03; Bruker Analytical X-ray Systems, Madison, WI, 1997.



# Copies of $^1\text{H}$ NMR, $^{13}\text{C}$ NMR and $^{19}\text{F}$ NMR spectra

$^1\text{H}$ -NMR spectrum of **1s** in  $\text{CDCl}_3$

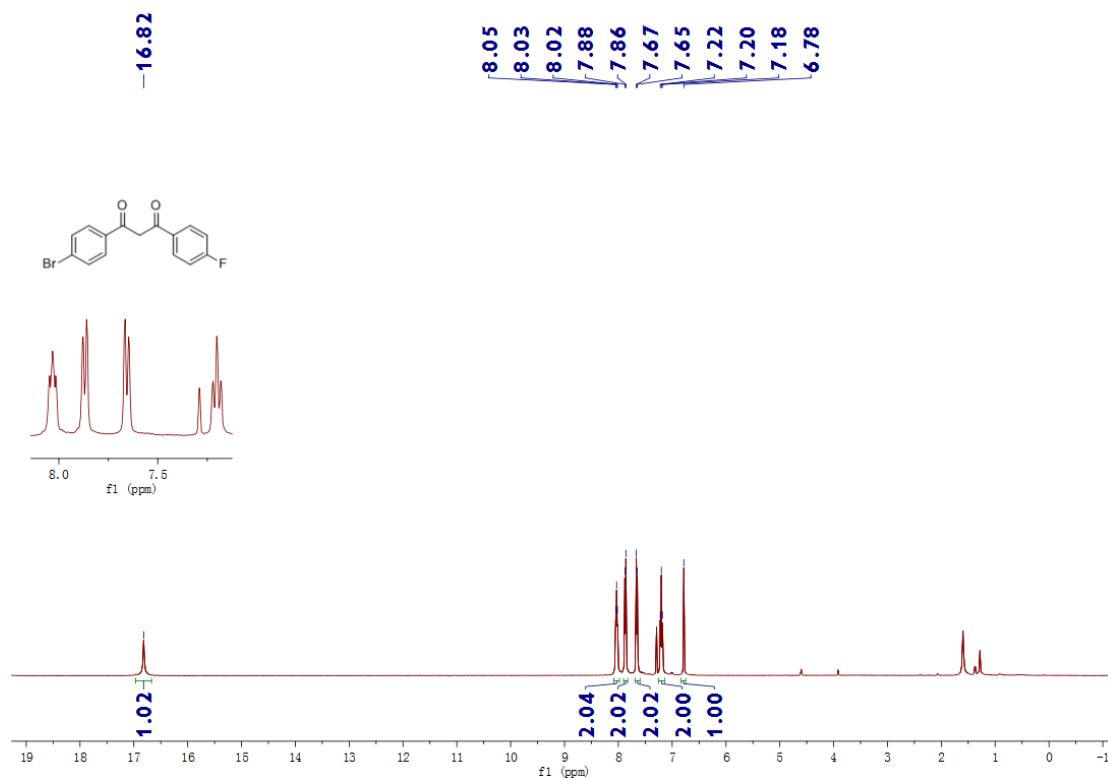

$^{13}\text{C}$ -NMR spectrum of **1s** in  $\text{CDCl}_3$

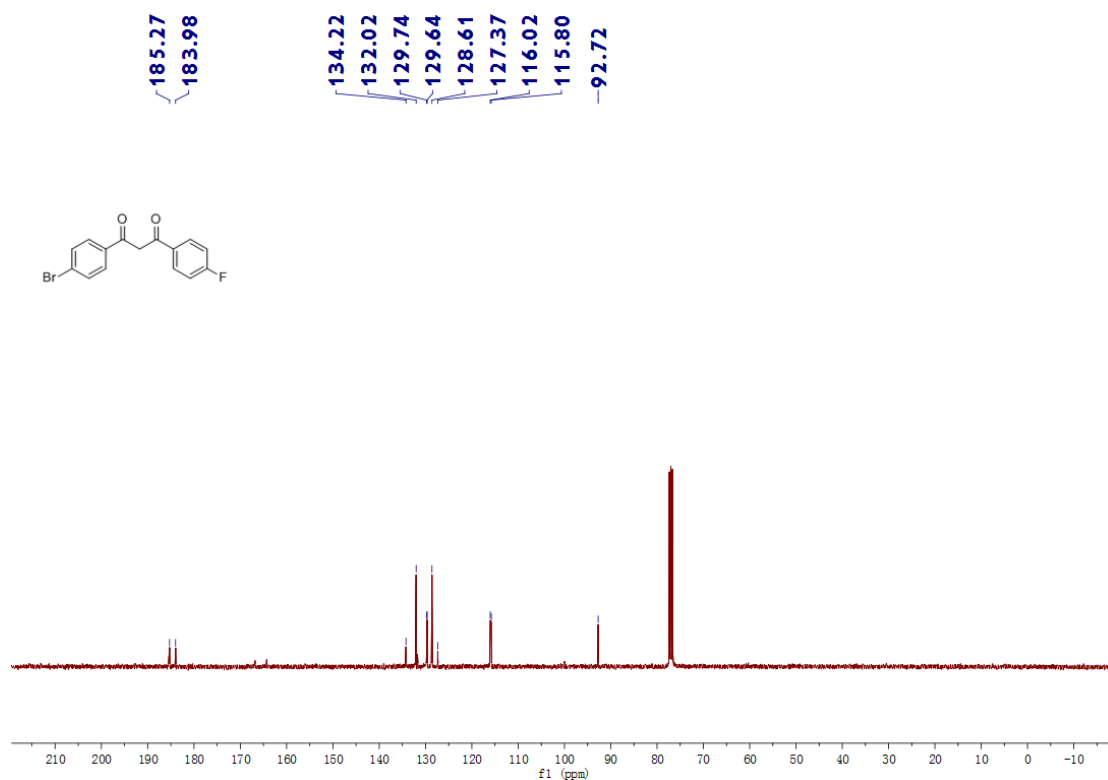

$^{19}\text{F}$ -NMR spectrum of **1s** in  $\text{CDCl}_3$

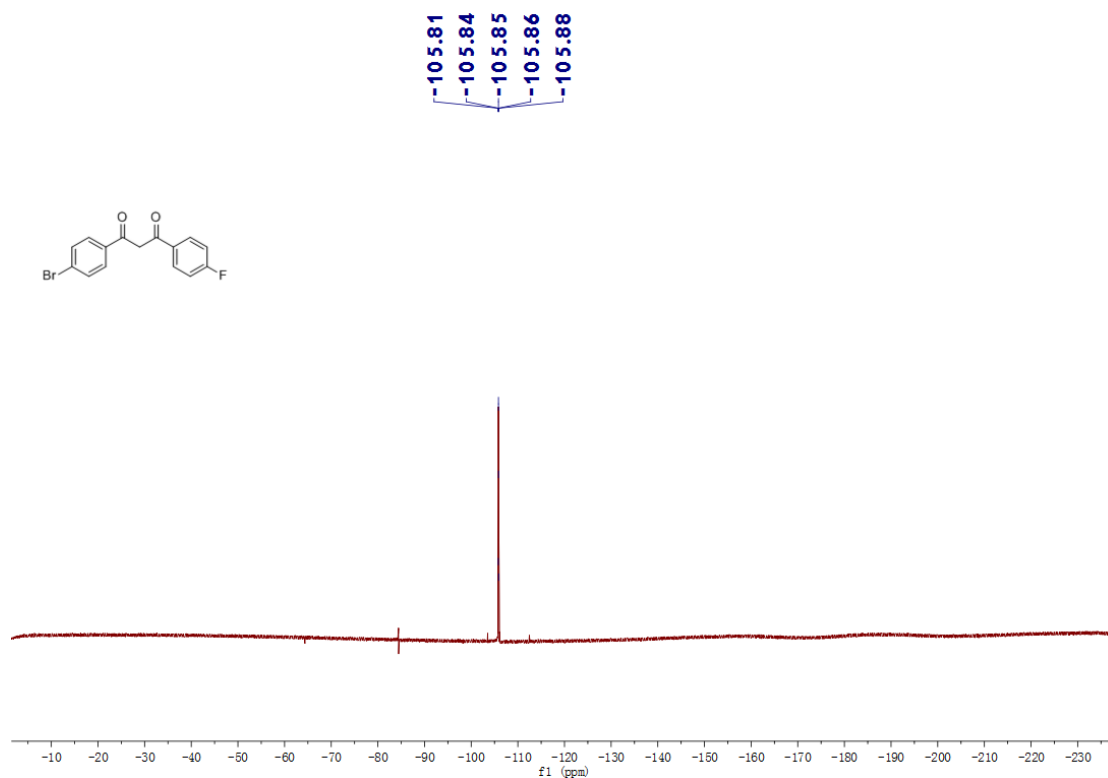

$^1\text{H}$ -NMR spectrum of **1y** in  $\text{CDCl}_3$

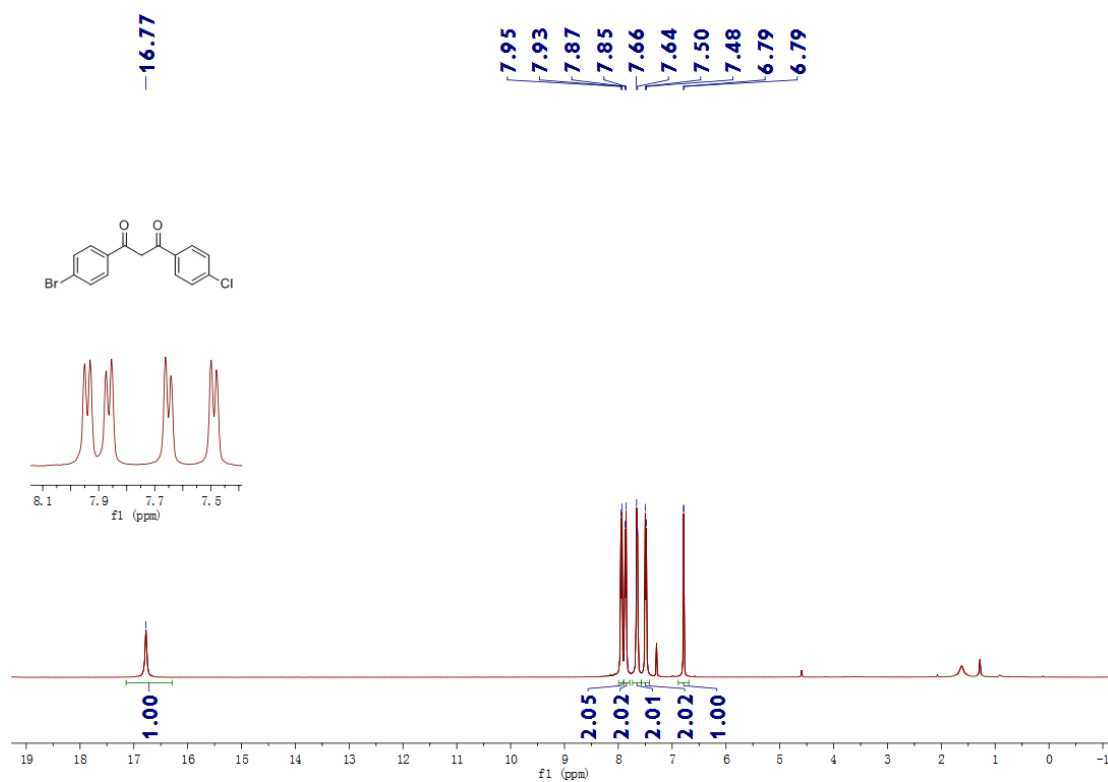

$^{13}\text{C}$ -NMR spectrum of **1y** in  $\text{CDCl}_3$

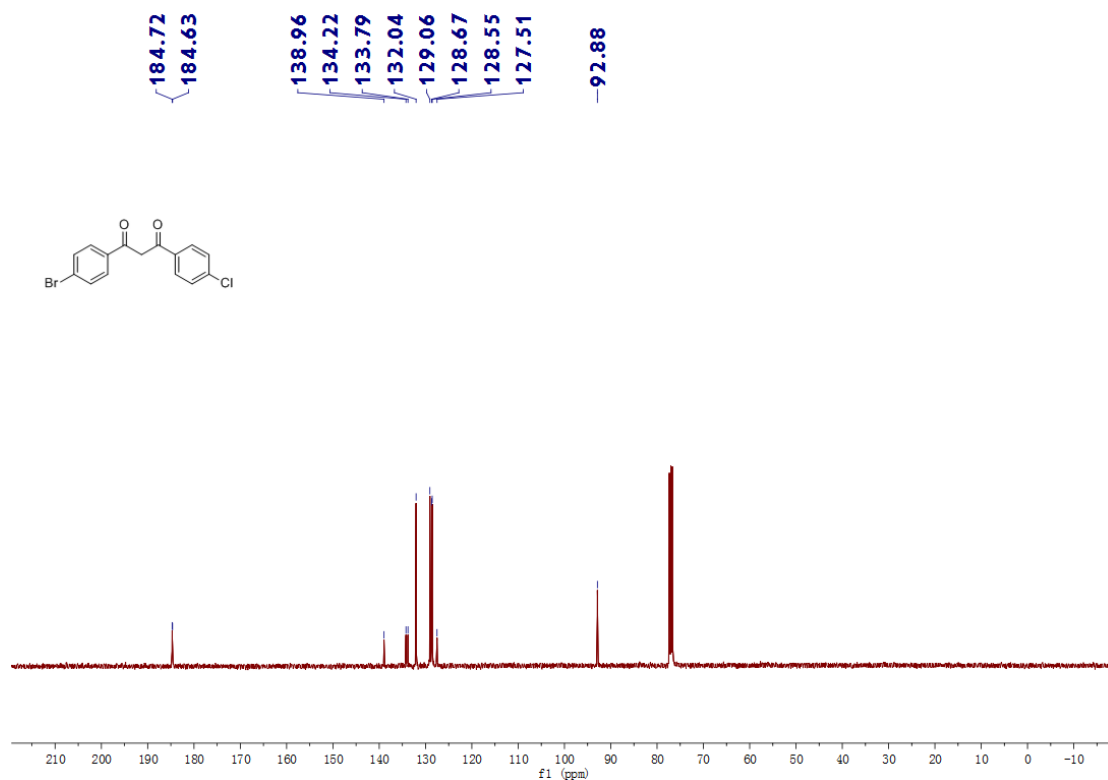

$^1\text{H}$ -NMR spectrum of **3a** in  $\text{CDCl}_3$

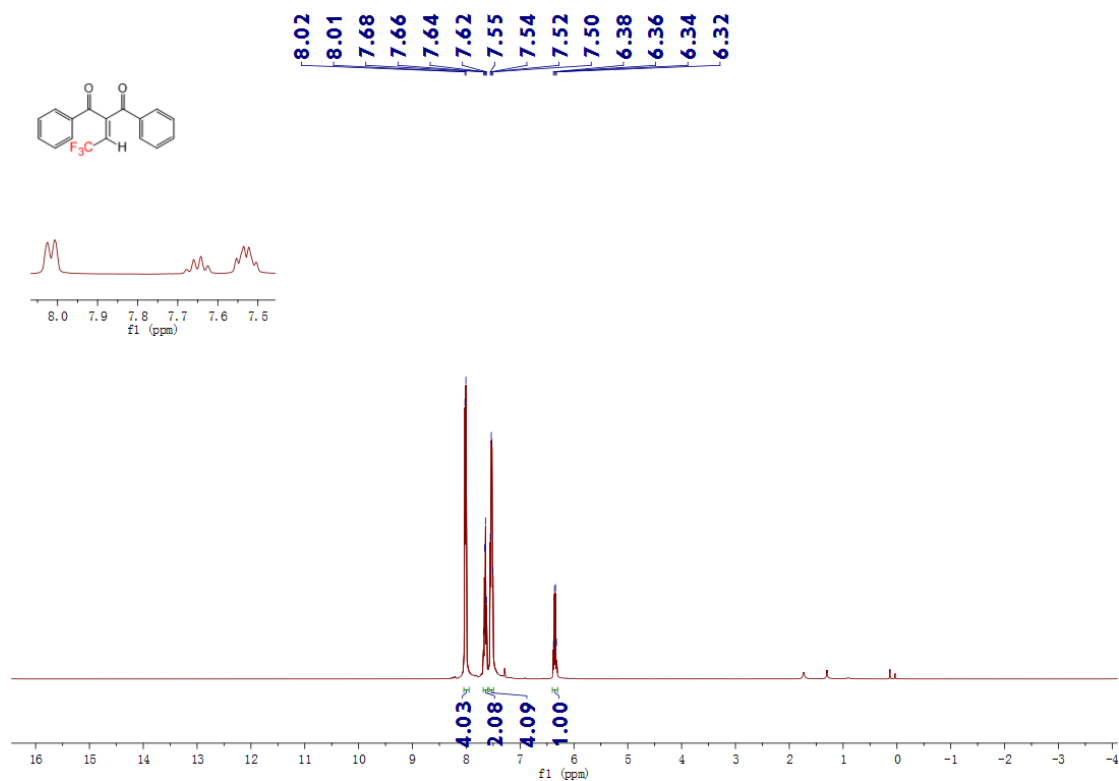

$^{13}\text{C}$ -NMR spectrum of **3a** in  $\text{CDCl}_3$

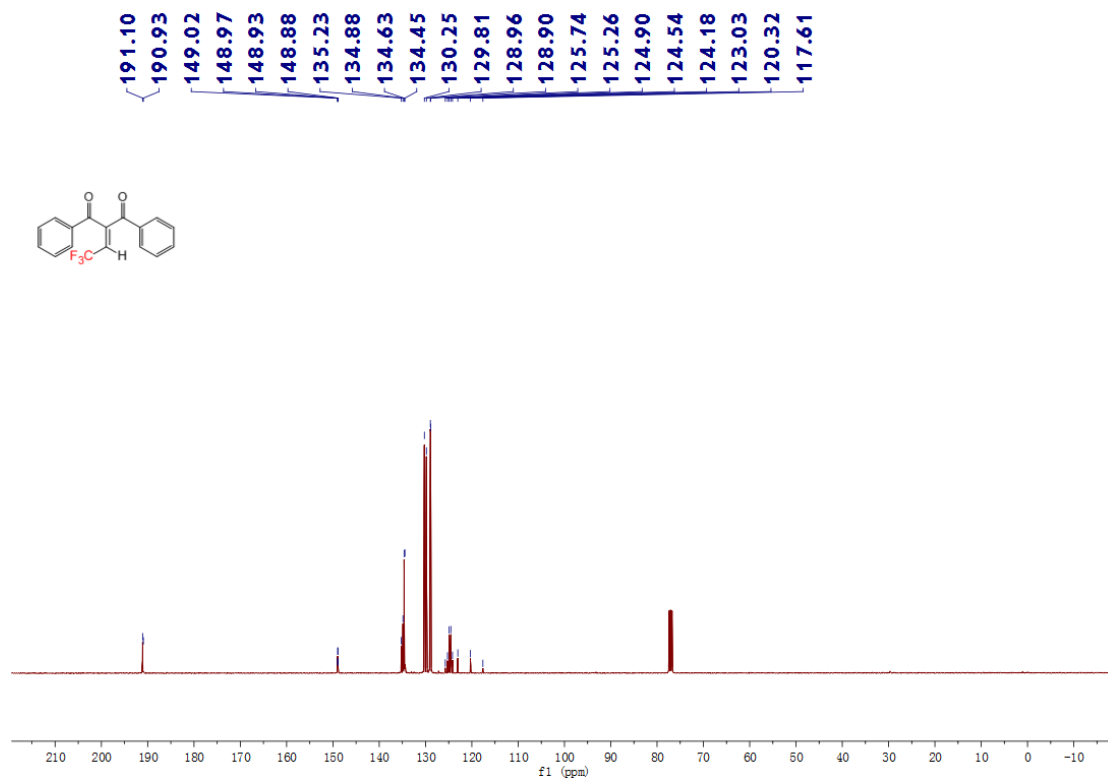

$^{19}\text{F}$ -NMR spectrum of **3a** in  $\text{CDCl}_3$

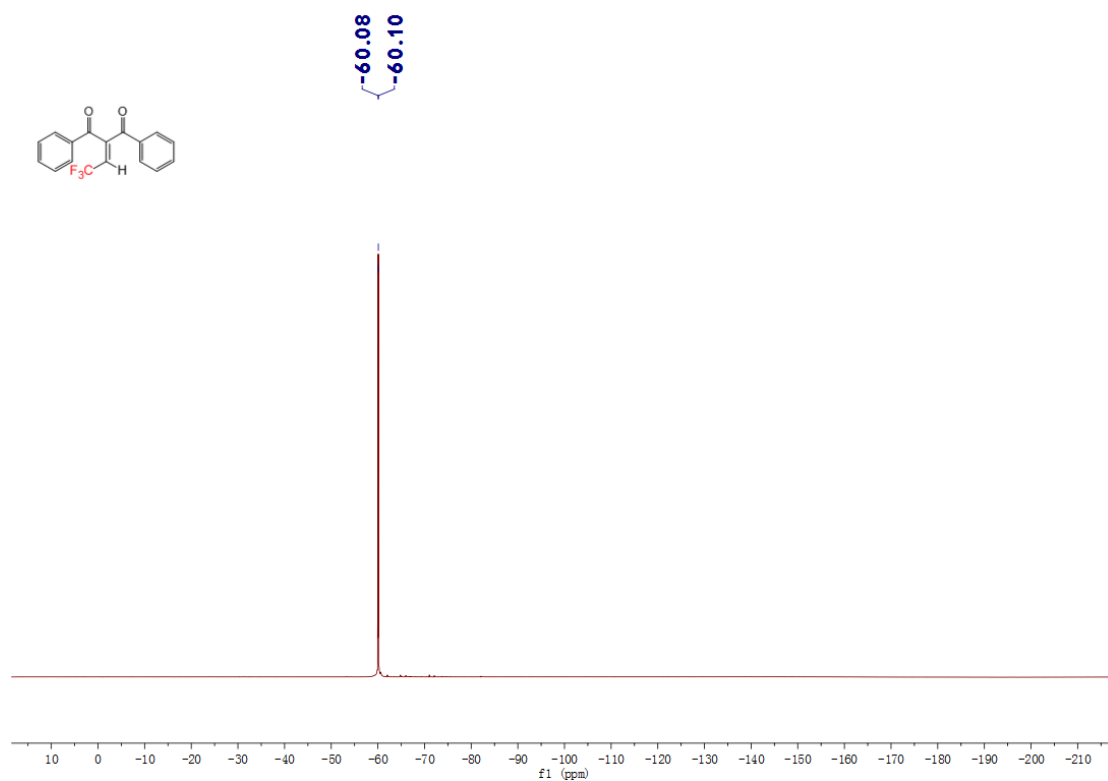

$^1\text{H}$ -NMR spectrum of **3b** in  $\text{CDCl}_3$

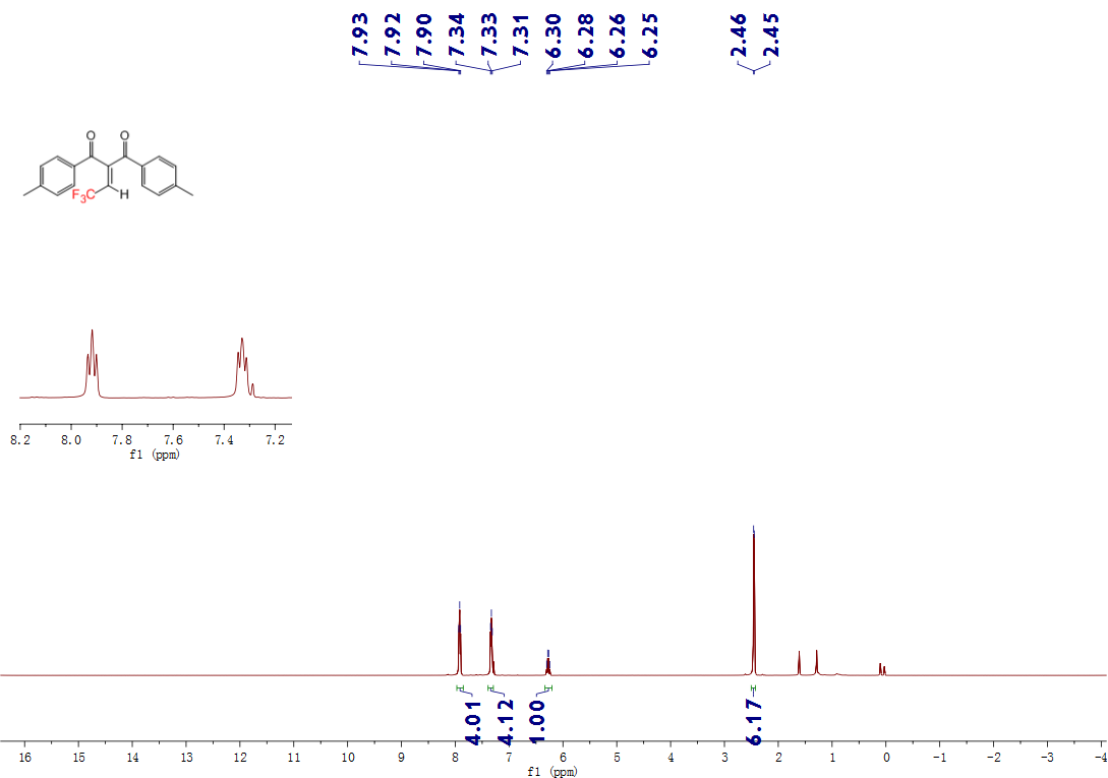

$^{13}\text{C}$ -NMR spectrum of **3b** in  $\text{CDCl}_3$

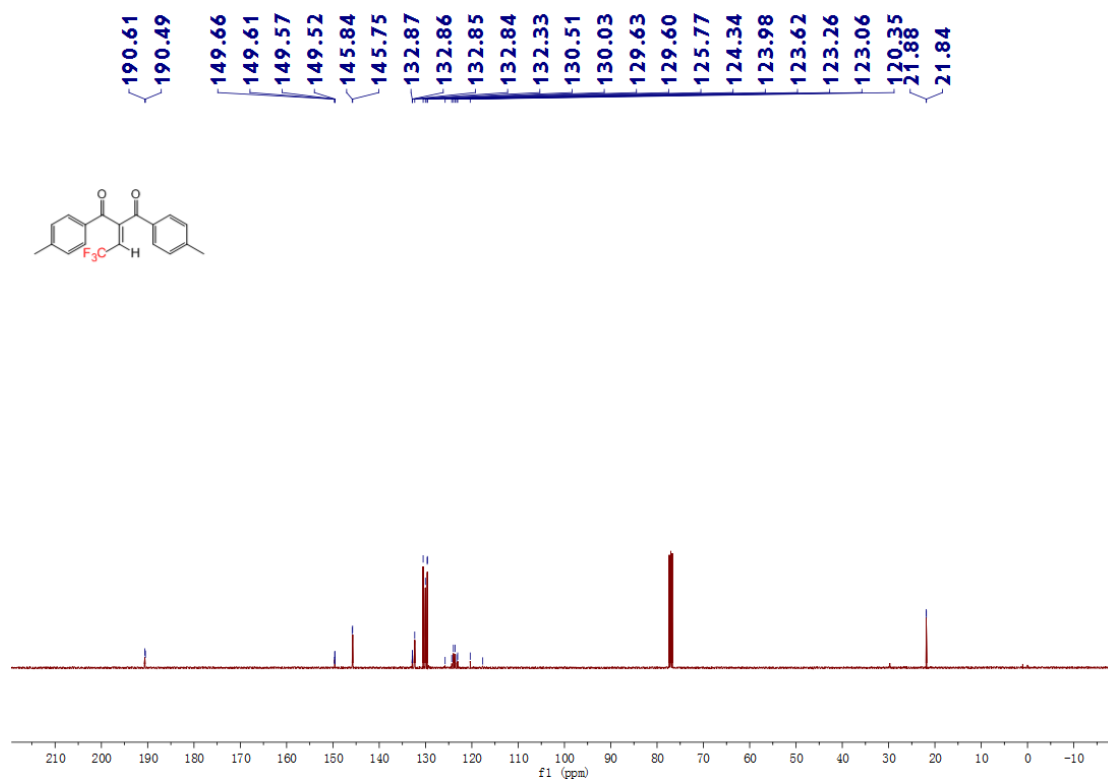

$^{19}\text{F}$ -NMR spectrum of **3b** in  $\text{CDCl}_3$

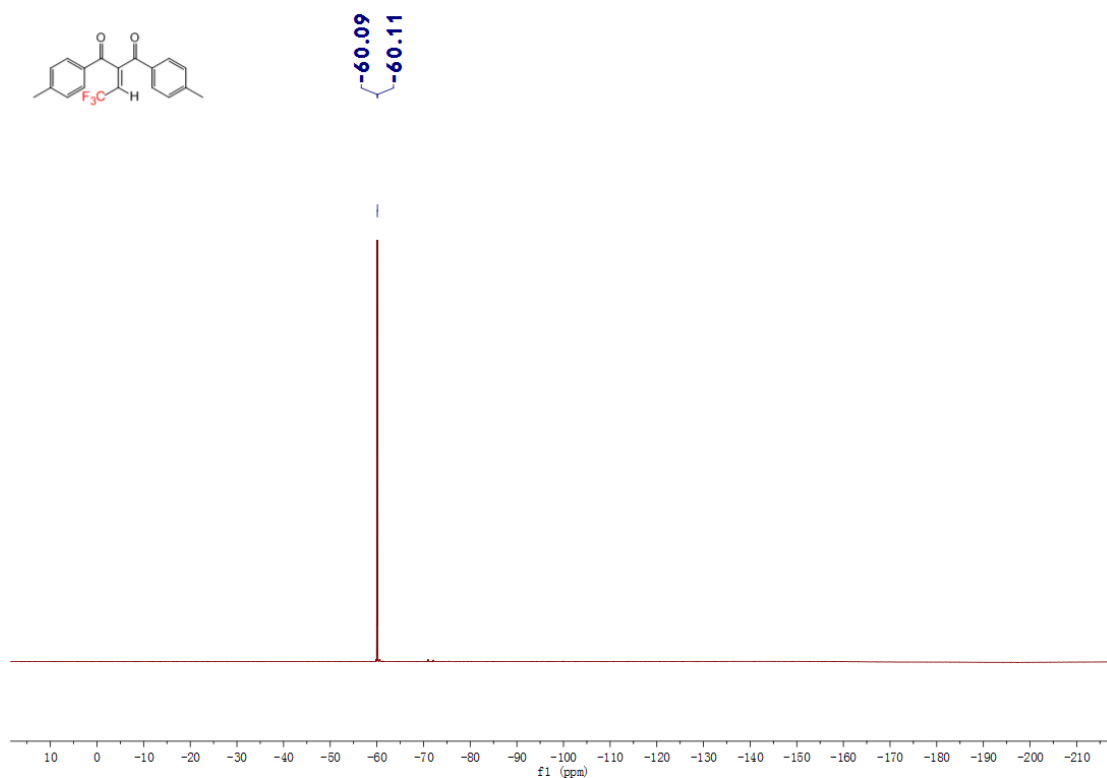

$^1\text{H}$ -NMR spectrum of **3c** in  $\text{CDCl}_3$

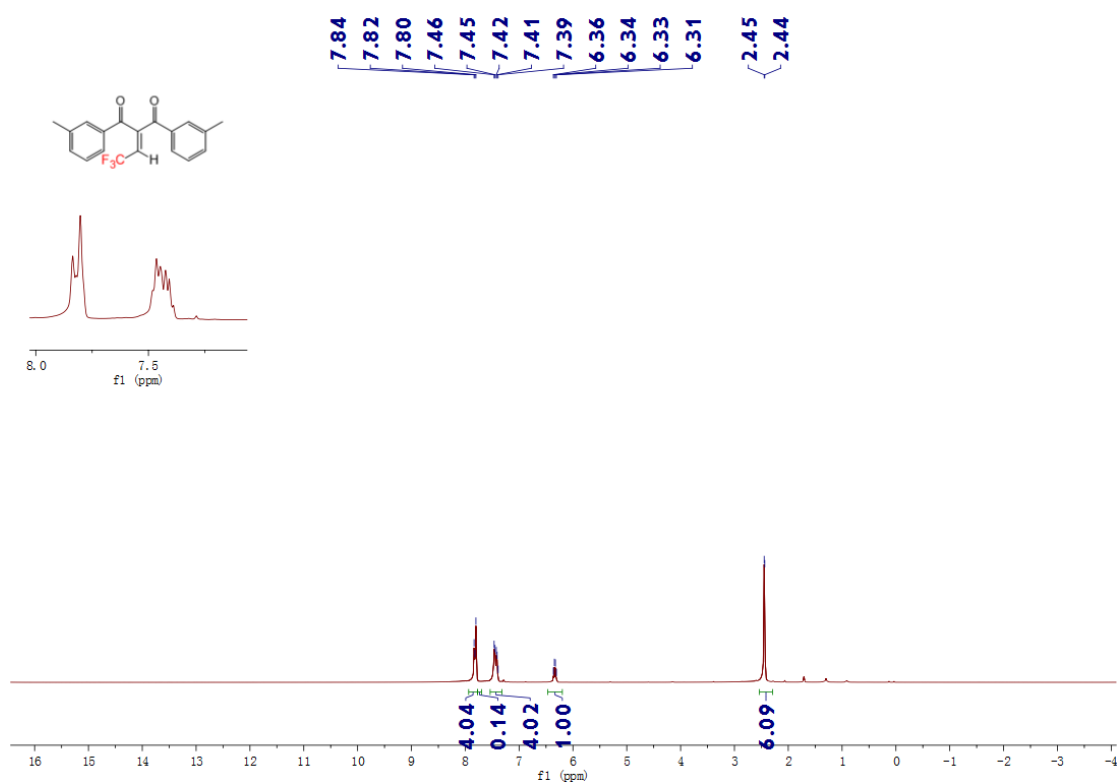

$^{13}\text{C}$ -NMR spectrum of **3c** in  $\text{CDCl}_3$

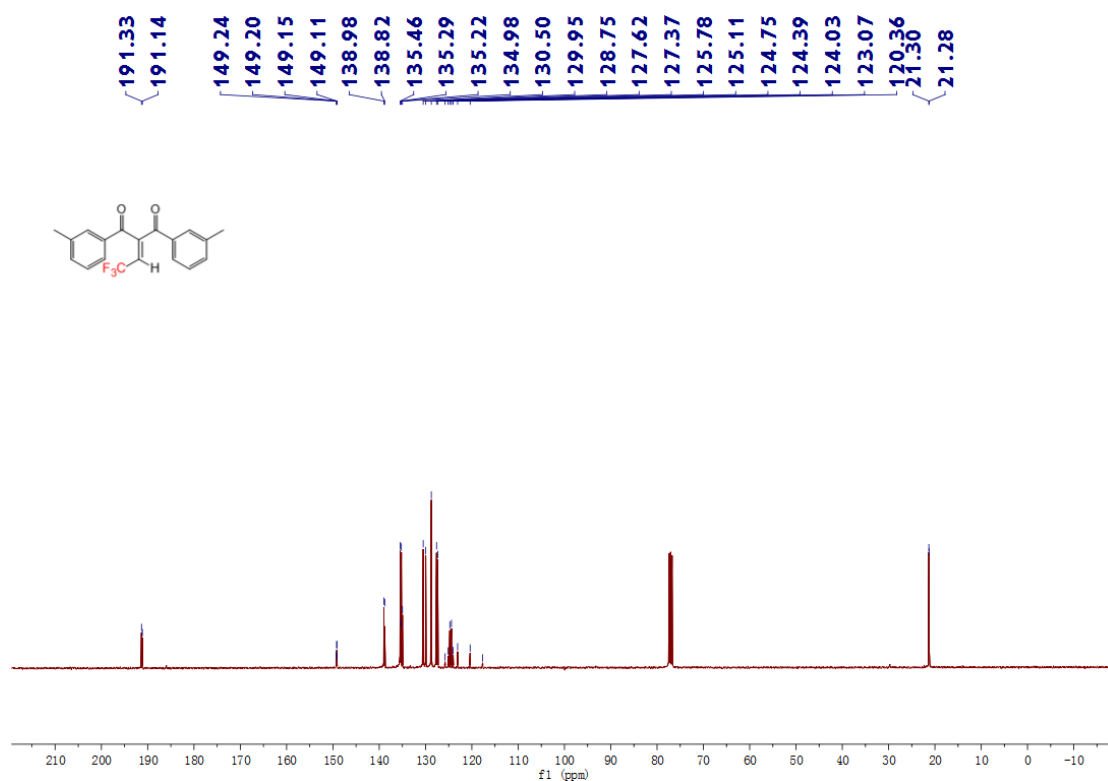

$^{19}\text{F}$ -NMR spectrum of **3c** in  $\text{CDCl}_3$

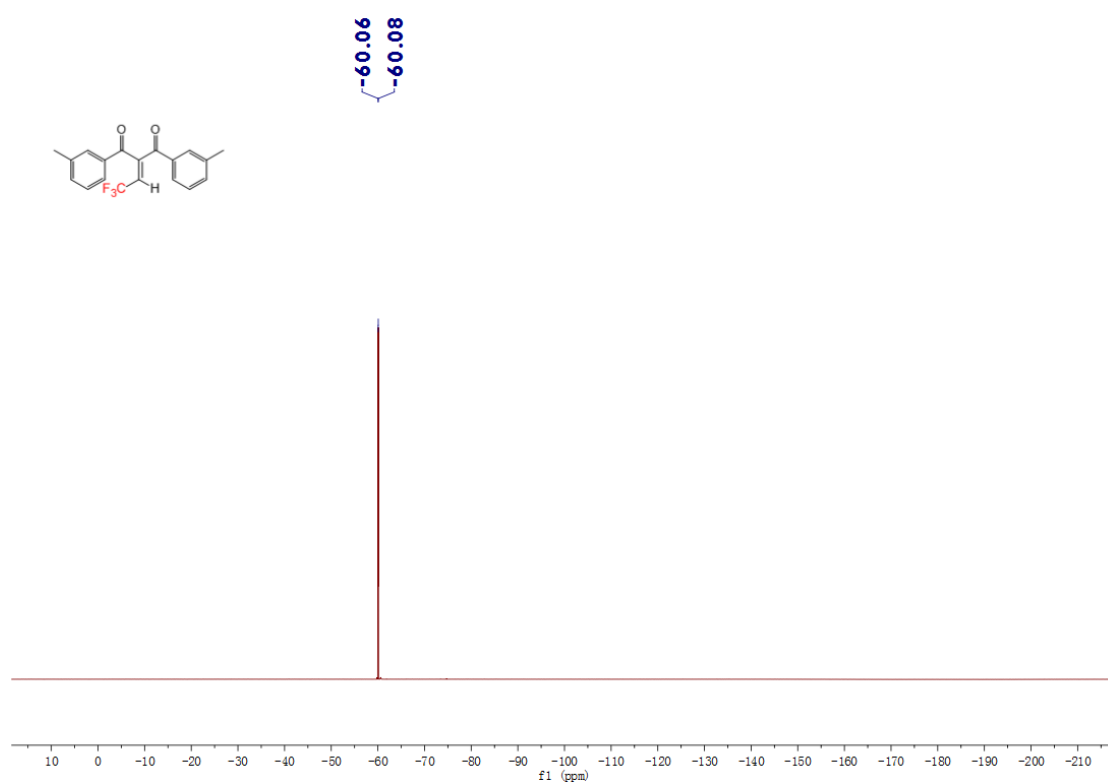

$^1\text{H}$ -NMR spectrum of **3d** in  $\text{CDCl}_3$

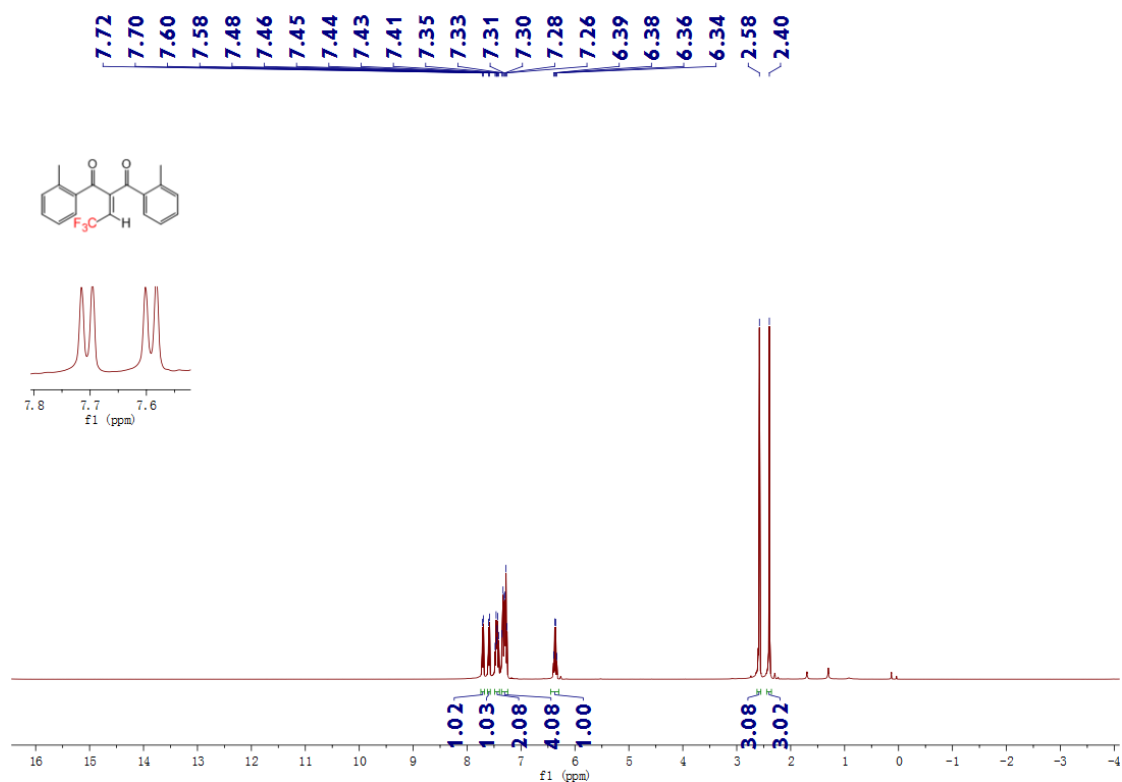

$^{13}\text{C}$ -NMR spectrum of **3d** in  $\text{CDCl}_3$

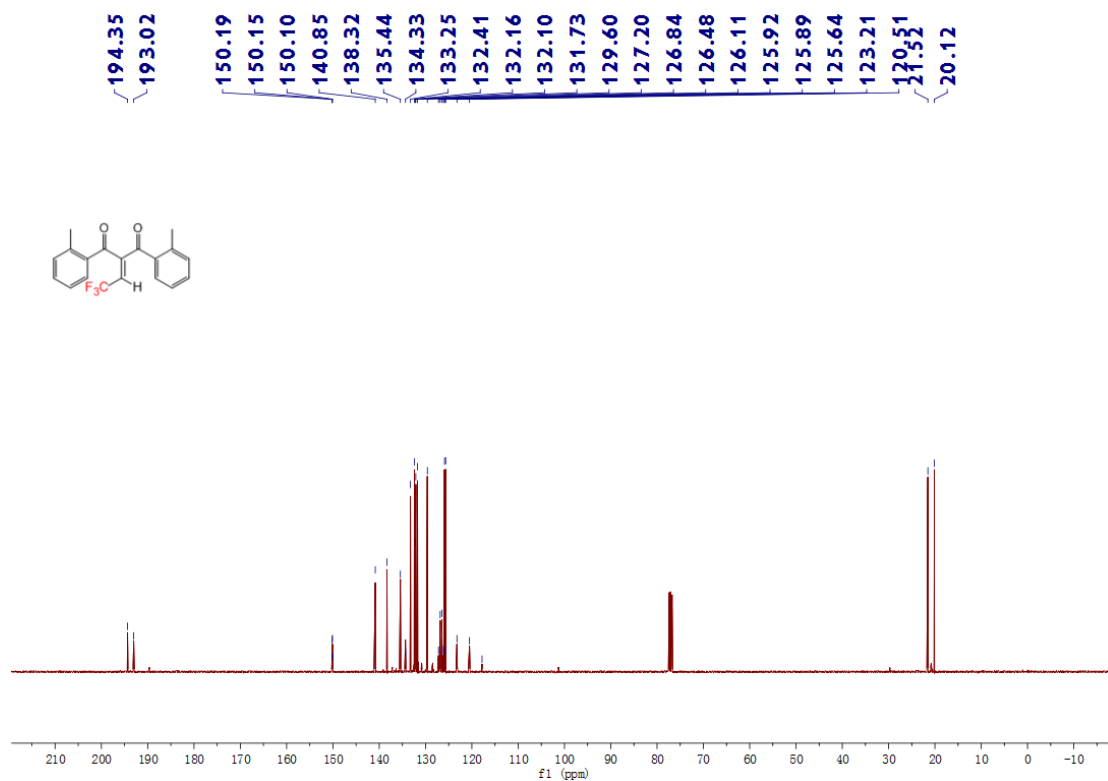



$^{19}\text{F}$ -NMR spectrum of **3d** in  $\text{CDCl}_3$

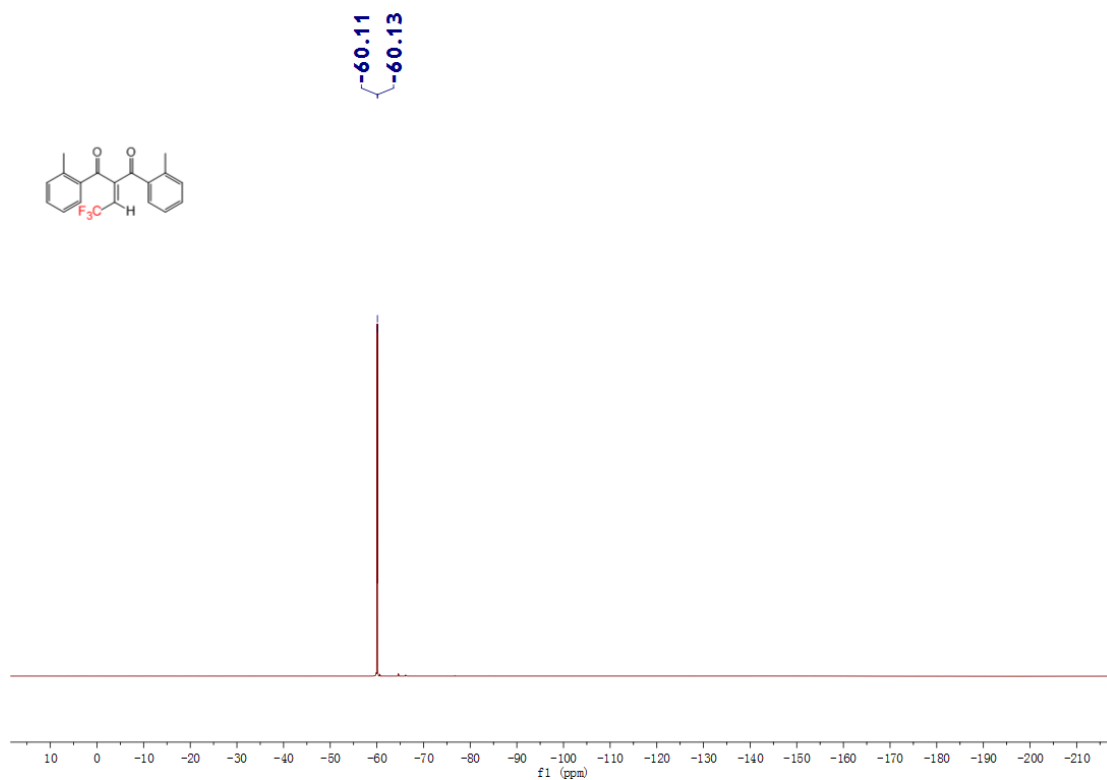

$^1\text{H}$ -NMR spectrum of **3e** in  $\text{CDCl}_3$

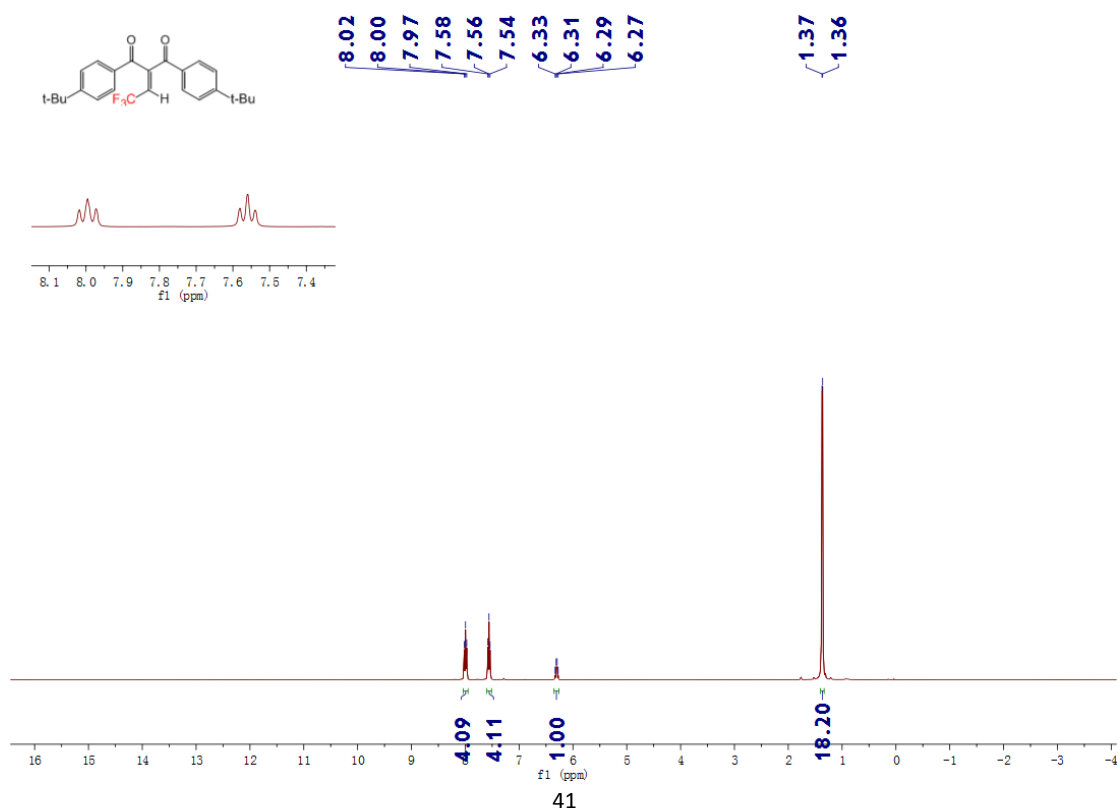

$^{13}\text{C}$ -NMR spectrum of **3e** in  $\text{CDCl}_3$

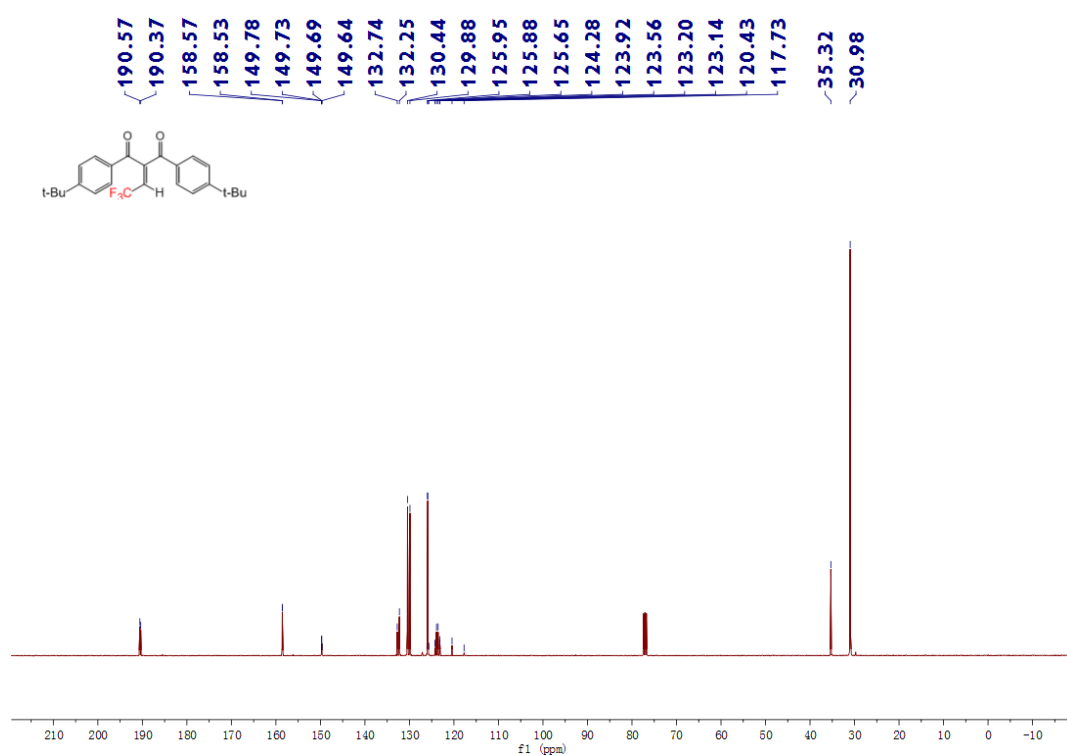

$^{19}\text{F}$ -NMR spectrum of **3e** in  $\text{CDCl}_3$

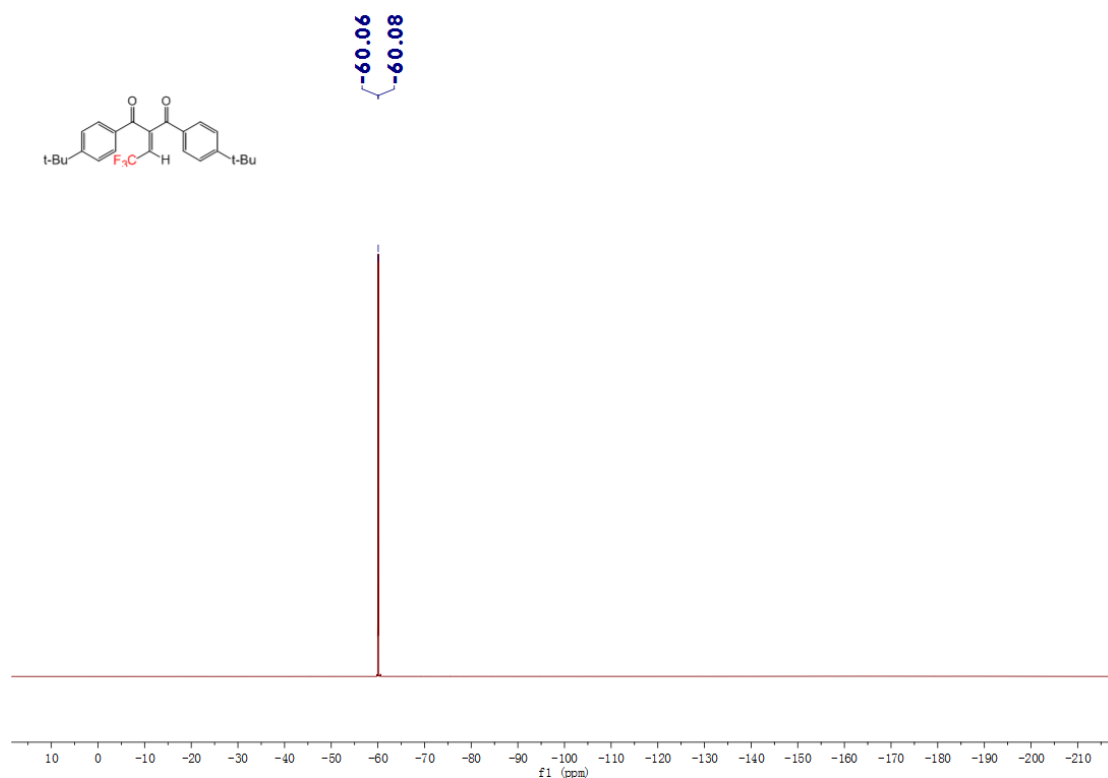

$^1\text{H}$ -NMR spectrum of **3f** in  $\text{CDCl}_3$

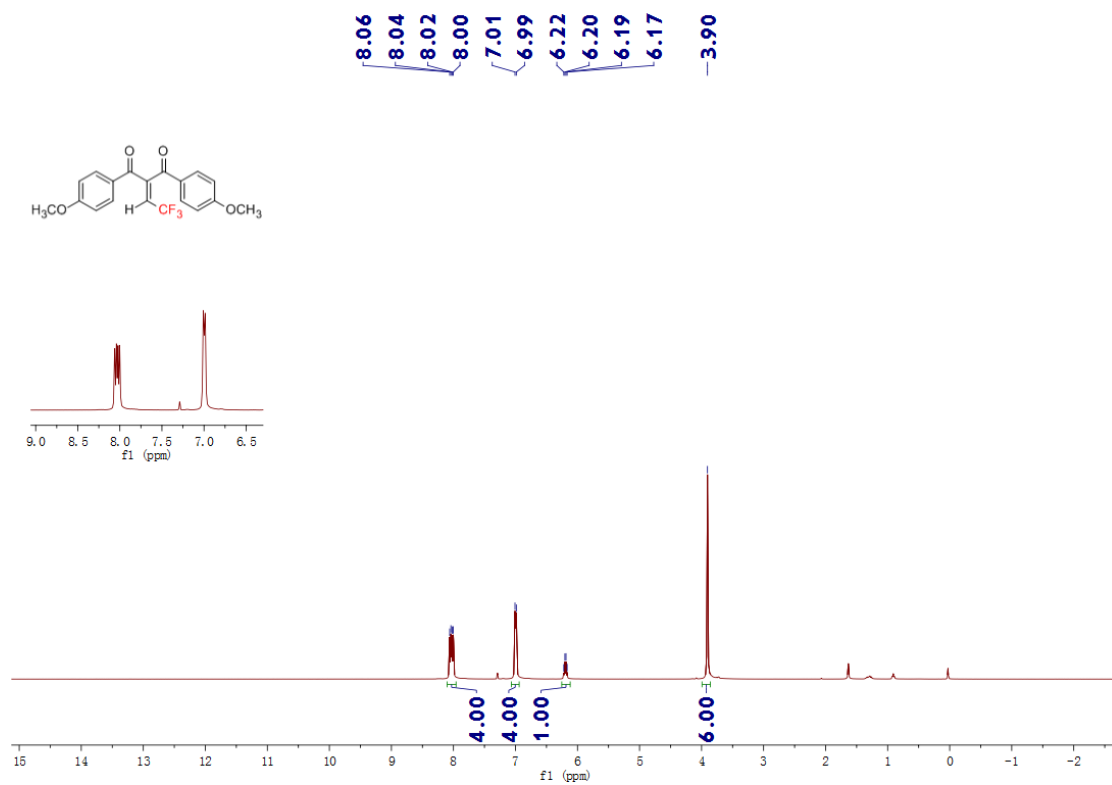

$^{13}\text{C}$ -NMR spectrum of **3f** in  $\text{CDCl}_3$

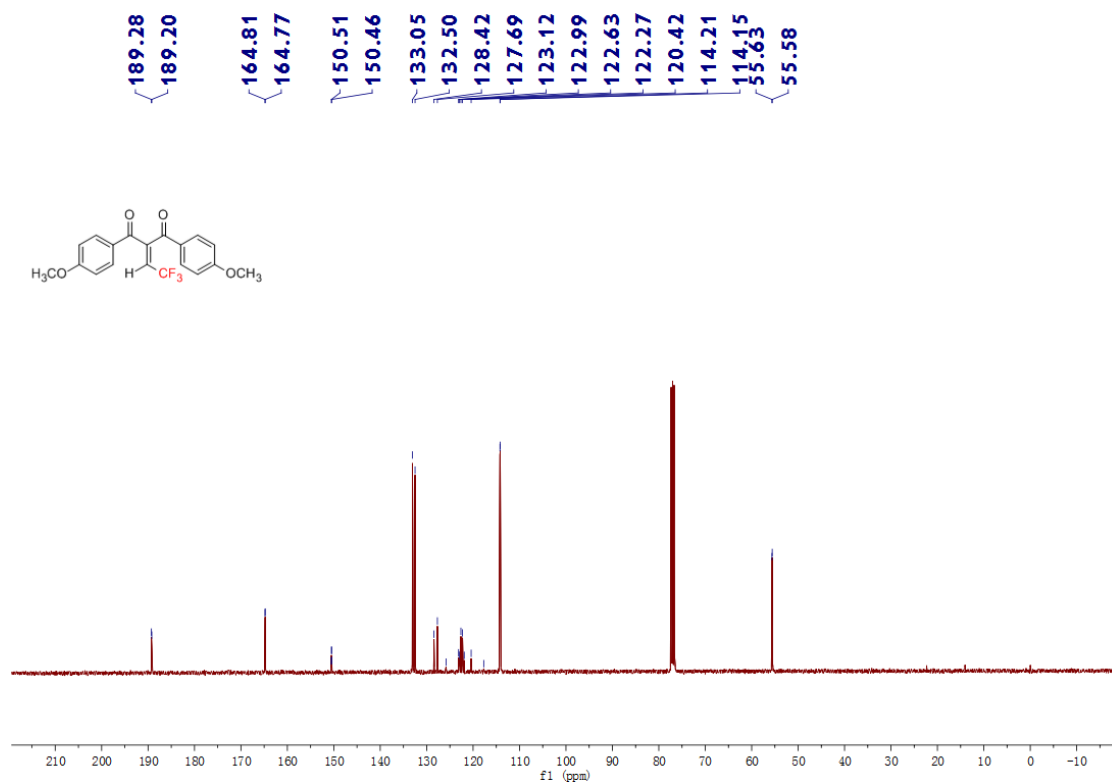

$^{19}\text{F}$ -NMR spectrum of **3f** in  $\text{CDCl}_3$

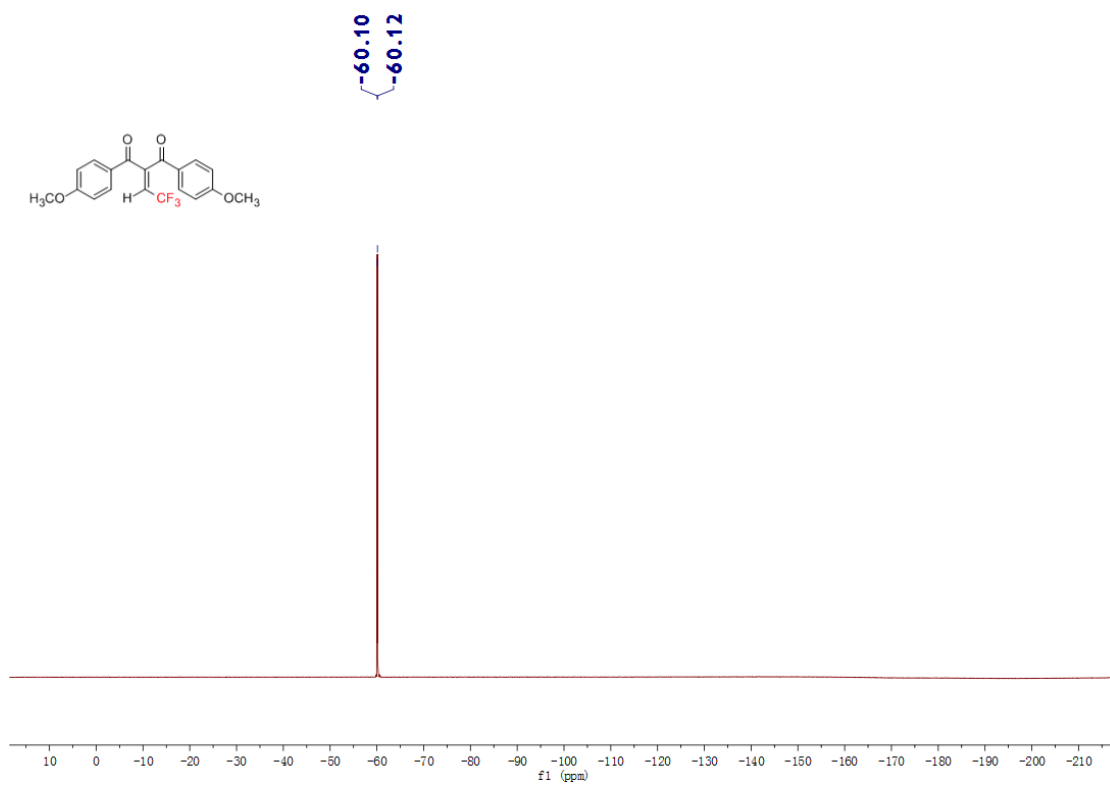

$^1\text{H}$ -NMR spectrum of **3g** in  $\text{CDCl}_3$

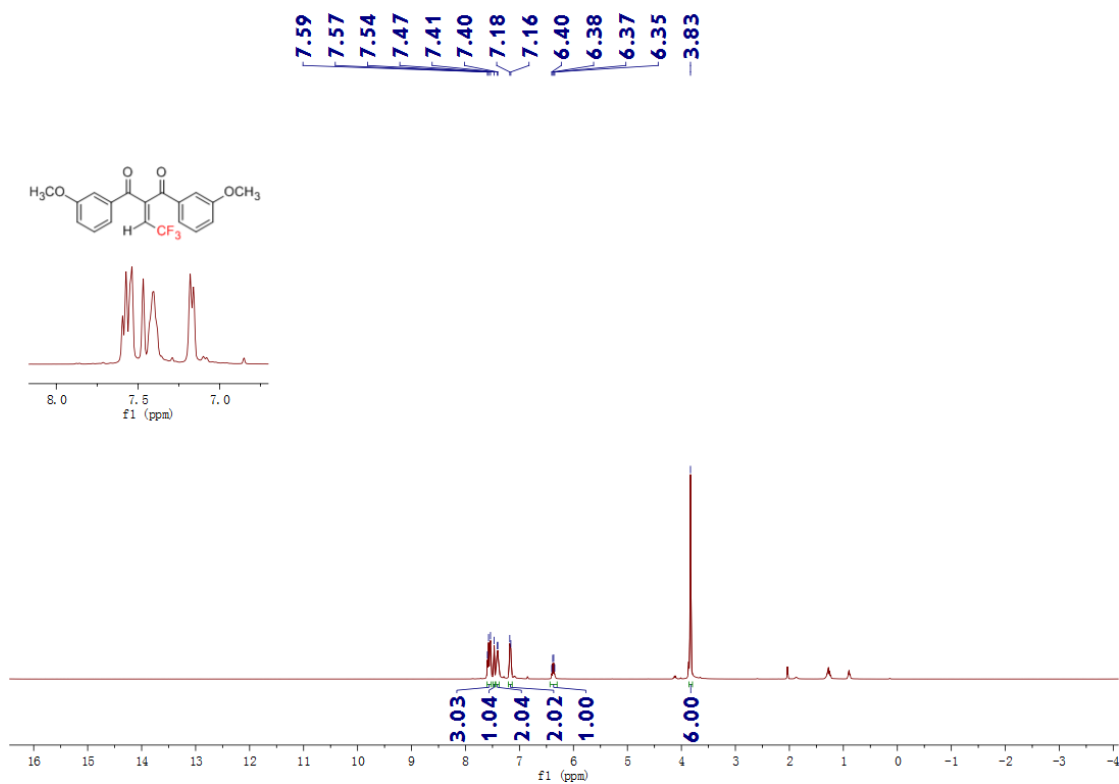

Chemical structure of 2-(4-methoxyphenyl)-3-(4-methoxyphenyl)-2,3-dihydro-1H-benz[e][1,2-b:4,5-b']dithiophene is shown. The structure features a central benzene ring substituted with two 4-methoxyphenyl groups and a trifluoromethyl group (CF<sub>3</sub>).

The <sup>13</sup>C NMR spectrum (CDCl<sub>3</sub>) displays the following chemical shifts (ppm):

- 190.70
- 190.61
- 160.01
- 159.98
- 149.03
- 148.99
- 136.52
- 136.11
- 129.91
- 125.11
- 124.75
- 123.05
- 122.99
- 122.93
- 121.46
- 121.05
- 120.35
- 113.99
- 113.04
- 55.40
- 55.37

The spectrum shows a complex pattern of peaks, with a prominent peak at 190.70 ppm, likely corresponding to the carbonyl carbon. The aromatic region (100-160 ppm) contains numerous peaks, and the aliphatic region (55.37-55.40 ppm) shows two distinct signals.

Chemical structure of 4-(4-methoxyphenyl)-2-(4-(trifluoromethyl)phenyl)-2H-chromene-3-carbaldehyde is shown. The structure features a central chromene core with a 4-methoxyphenyl group at position 4, a 4-(trifluoromethyl)phenyl group at position 2, and a formyl group at position 3. The trifluoromethyl group is highlighted in red.

The <sup>13</sup>C NMR spectrum (CDCl<sub>3</sub>) shows a single peak at 60.09 ppm, which is assigned to the methoxy carbons. The peak is labeled with its chemical shift, 60.09, and the solvent peak is indicated by a bracketed label, ~60.11.

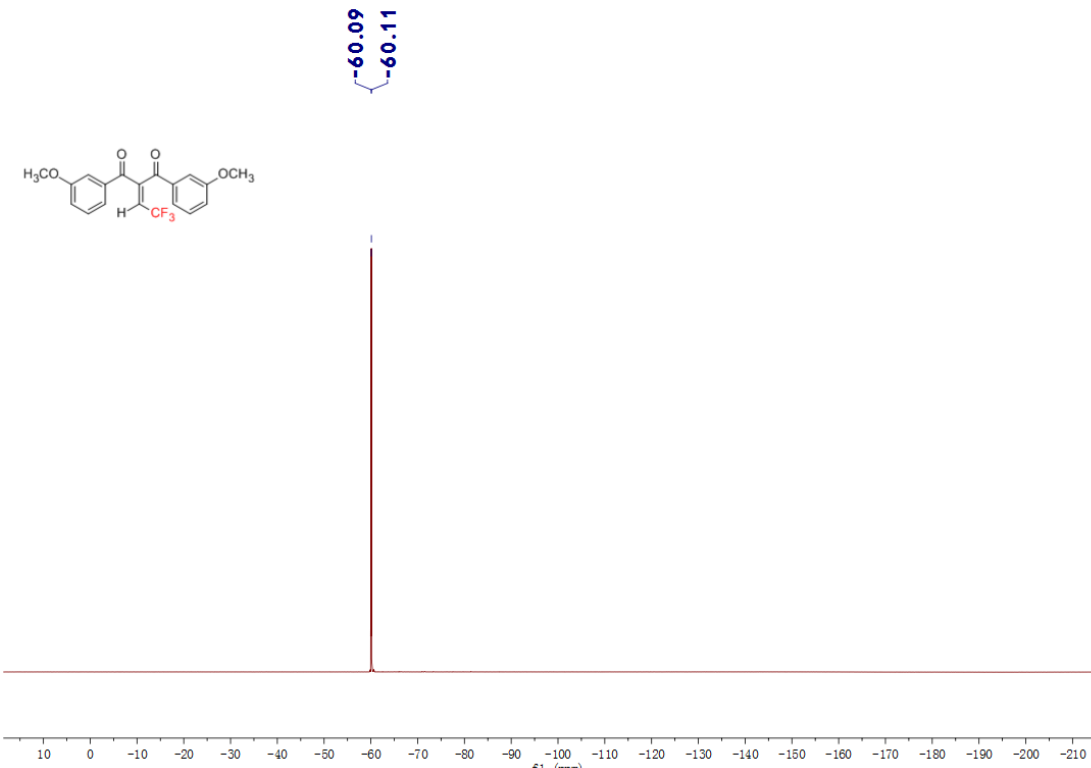

The spectrum displays a single sharp peak at 60.09 ppm, corresponding to the methoxy carbons. The x-axis represents the chemical shift in ppm, ranging from 10 to -210. The peak is labeled with its chemical shift, 60.09, and the solvent peak is indicated by a bracketed label, ~60.11.

$^1\text{H}$ -NMR spectrum of **3h** in  $\text{CDCl}_3$

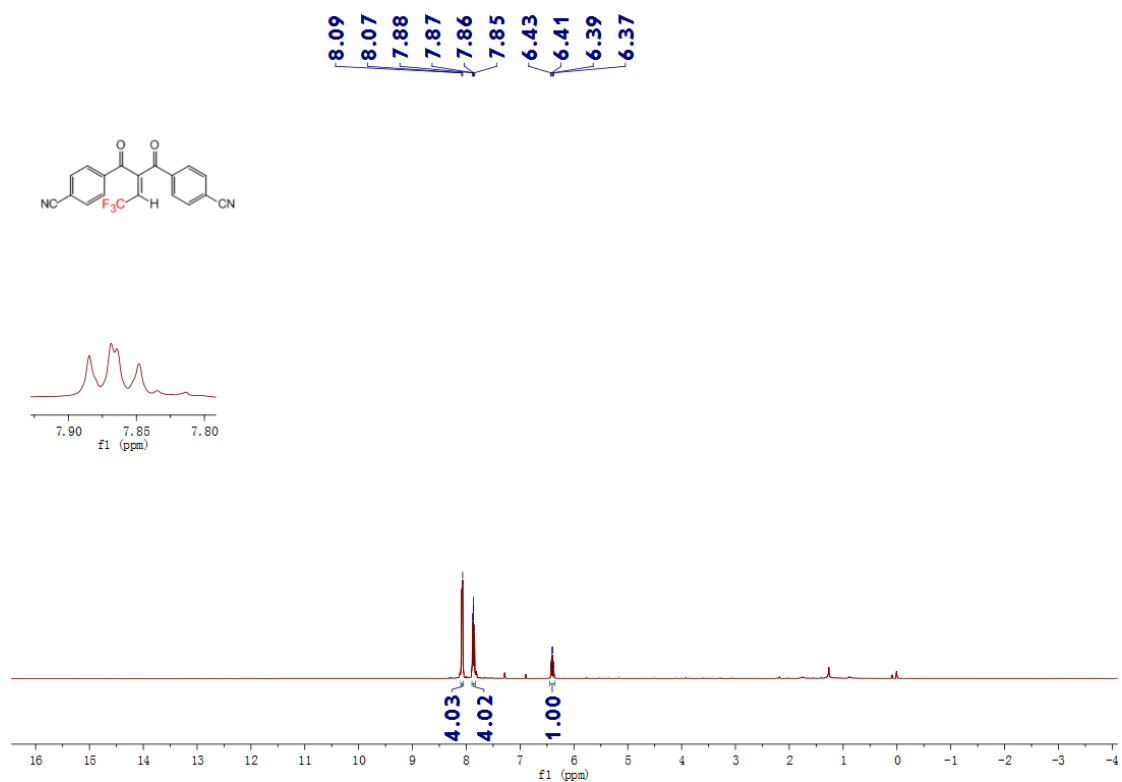

$^{13}\text{C}$ -NMR spectrum of **3h** in  $\text{CDCl}_3$

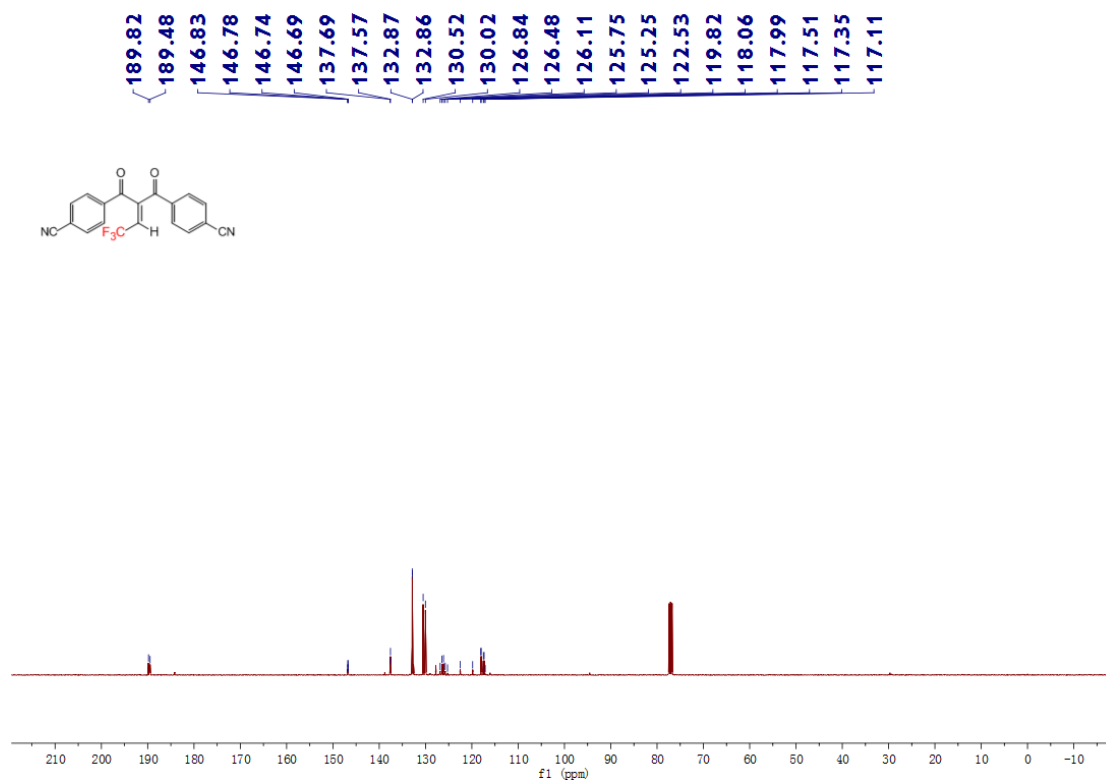

$^{19}\text{F}$ -NMR spectrum of **3h** in  $\text{CDCl}_3$

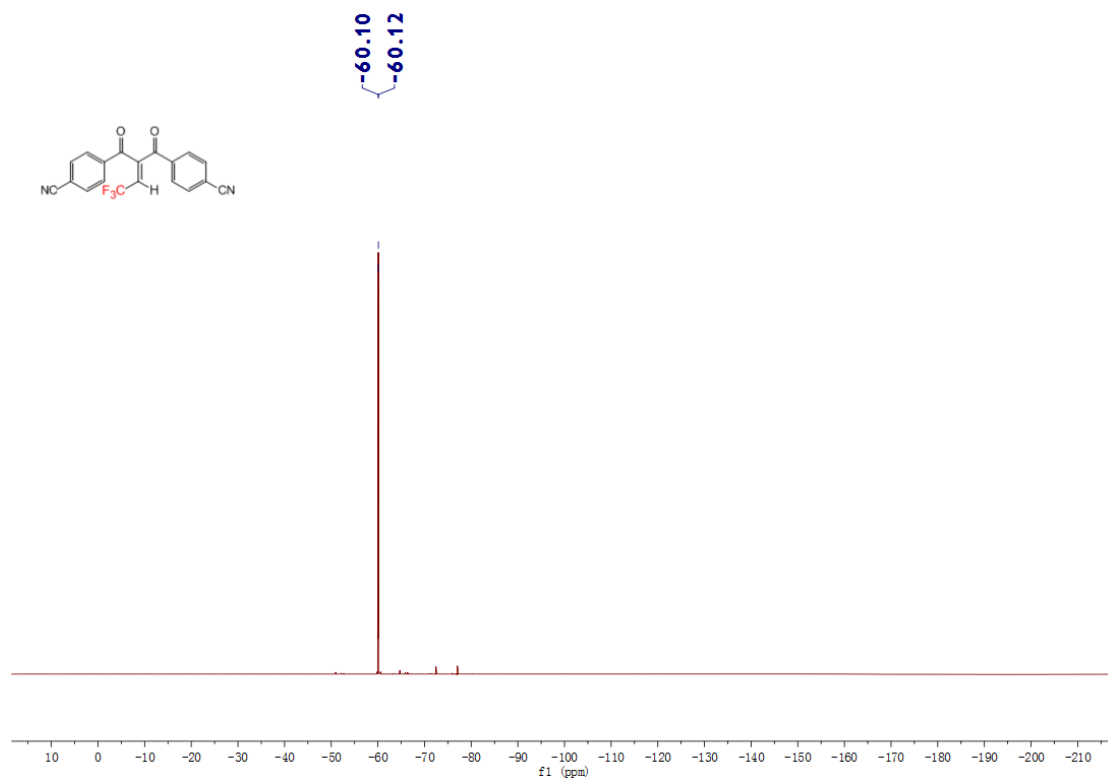

$^1\text{H}$ -NMR spectrum of **3i** in  $\text{CDCl}_3$

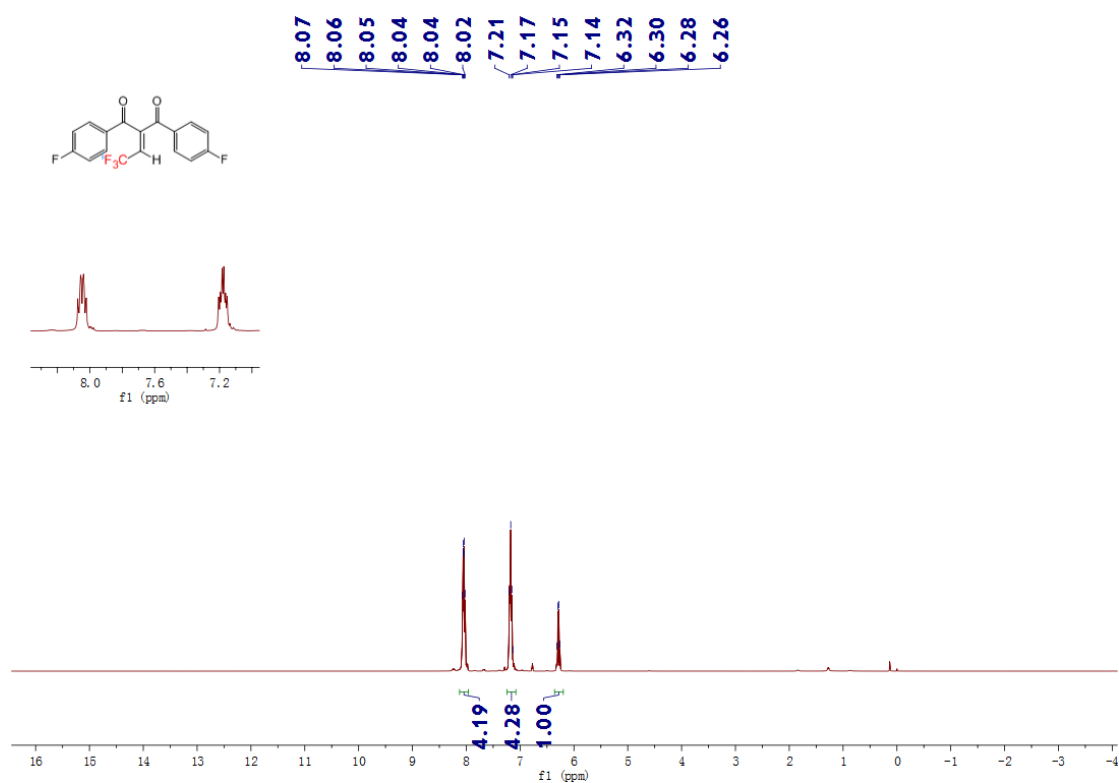

$^{13}\text{C}$ -NMR spectrum of **3i** in  $\text{CDCl}_3$

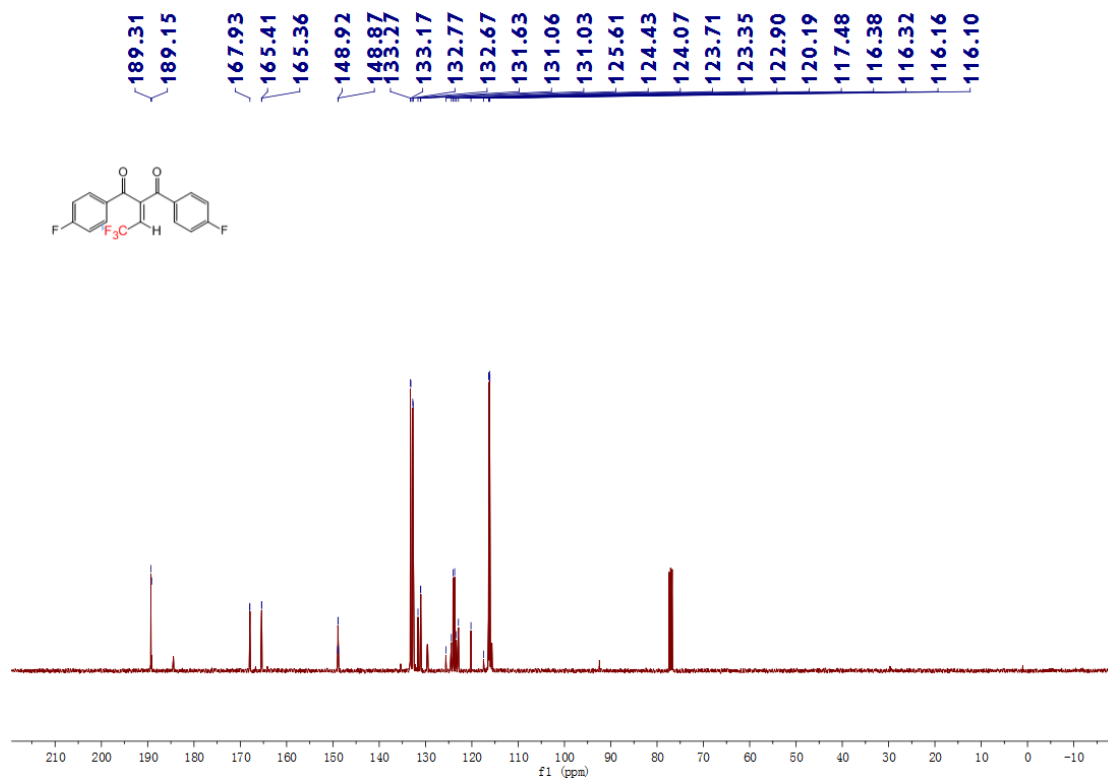

$^{19}\text{F}$ -NMR spectrum of **3i** in  $\text{CDCl}_3$

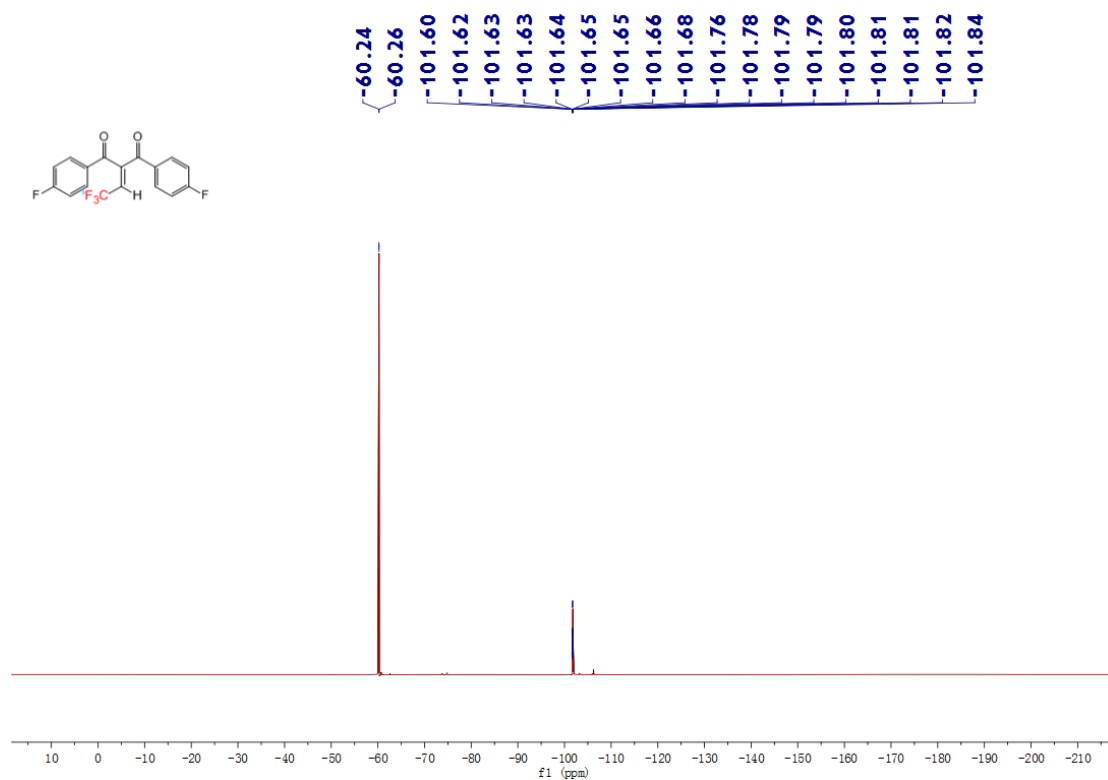



$^1\text{H}$ -NMR spectrum of **3j** in  $\text{CDCl}_3$

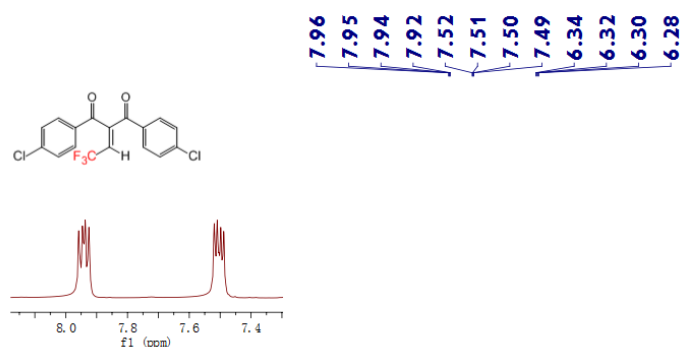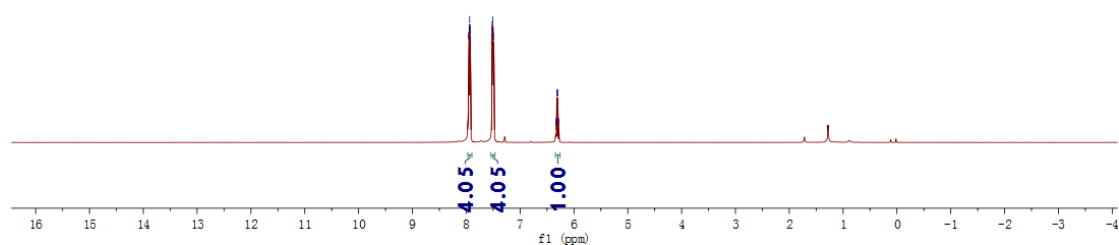

$^{13}\text{C}$ -NMR spectrum of **3j** in  $\text{CDCl}_3$

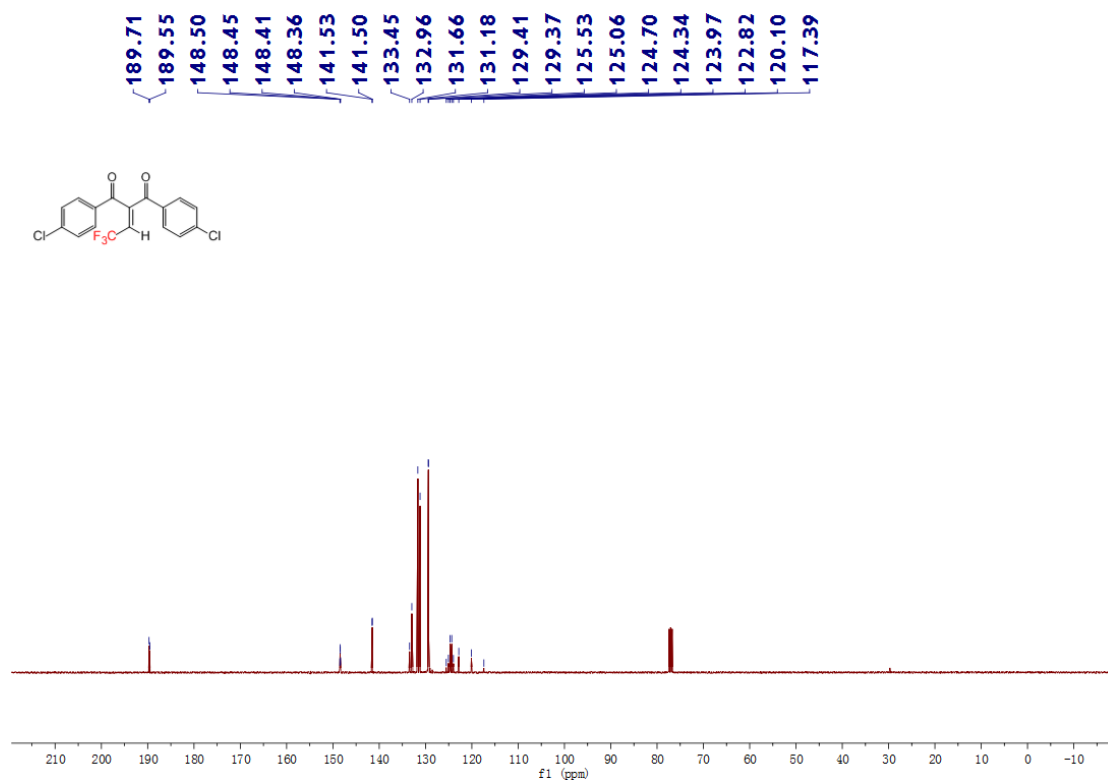

$^{19}\text{F}$ -NMR spectrum of **3j** in  $\text{CDCl}_3$

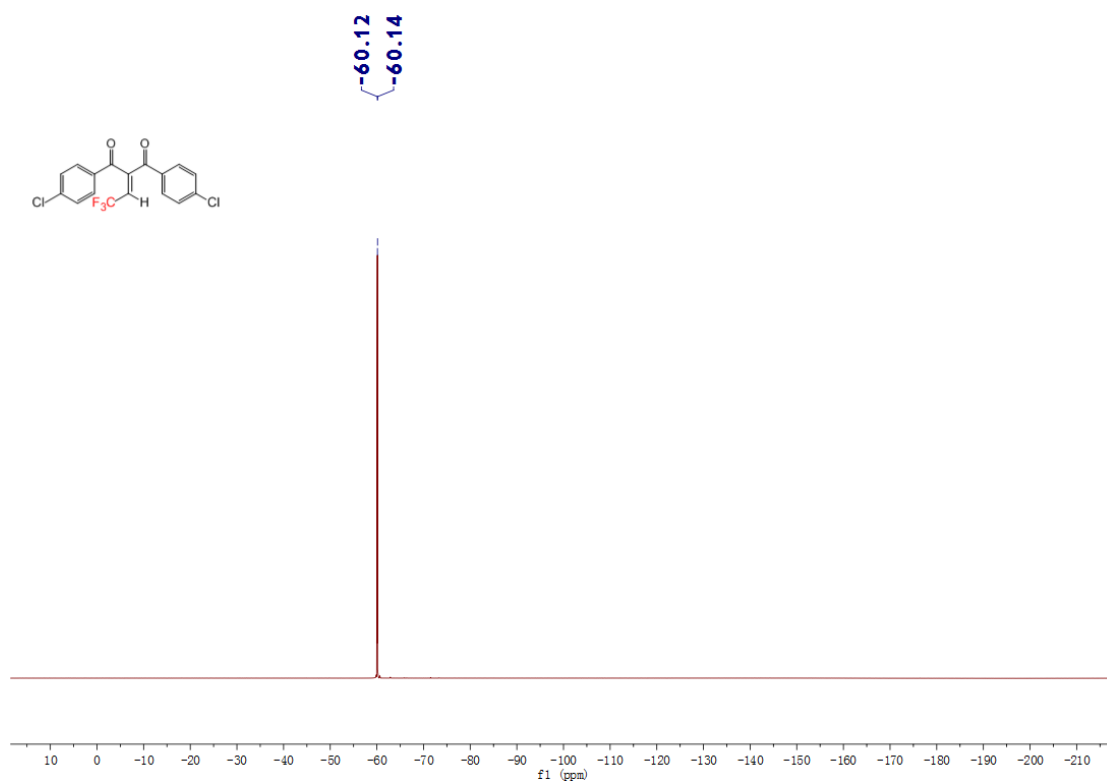

$^1\text{H}$ -NMR spectrum of **3k** in  $\text{CDCl}_3$

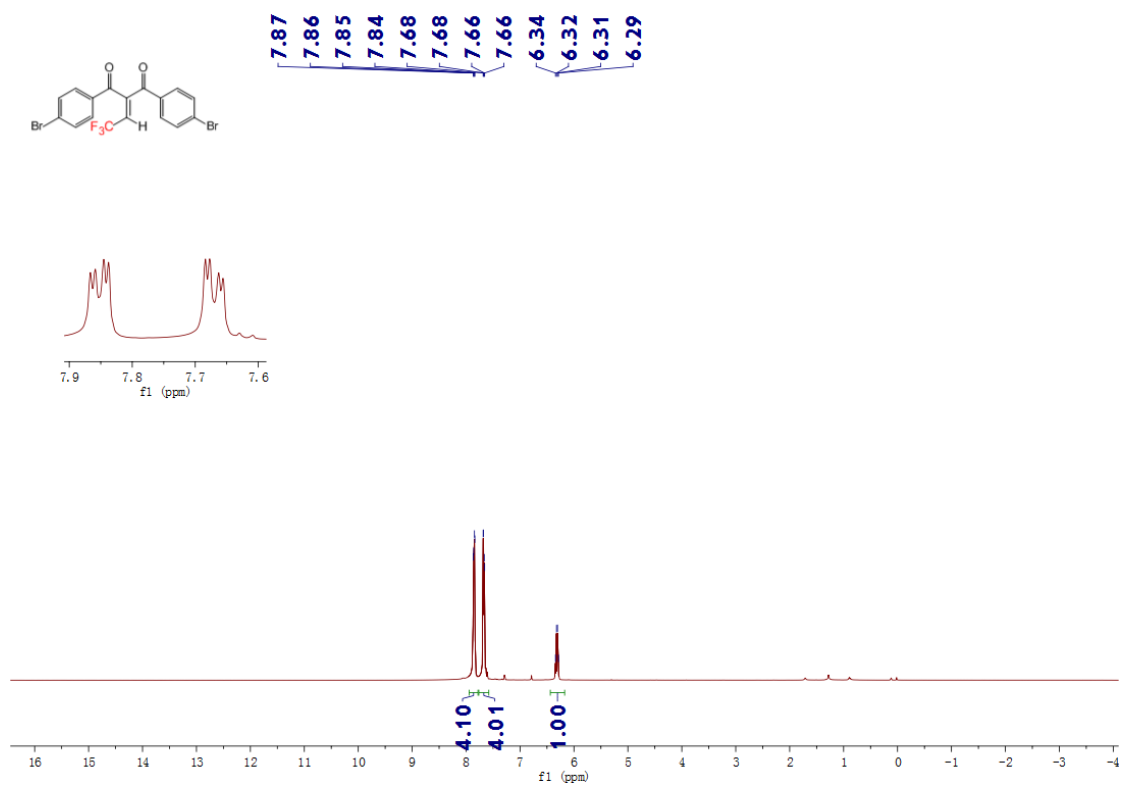

$^{13}\text{C}$ -NMR spectrum of **3k** in  $\text{CDCl}_3$

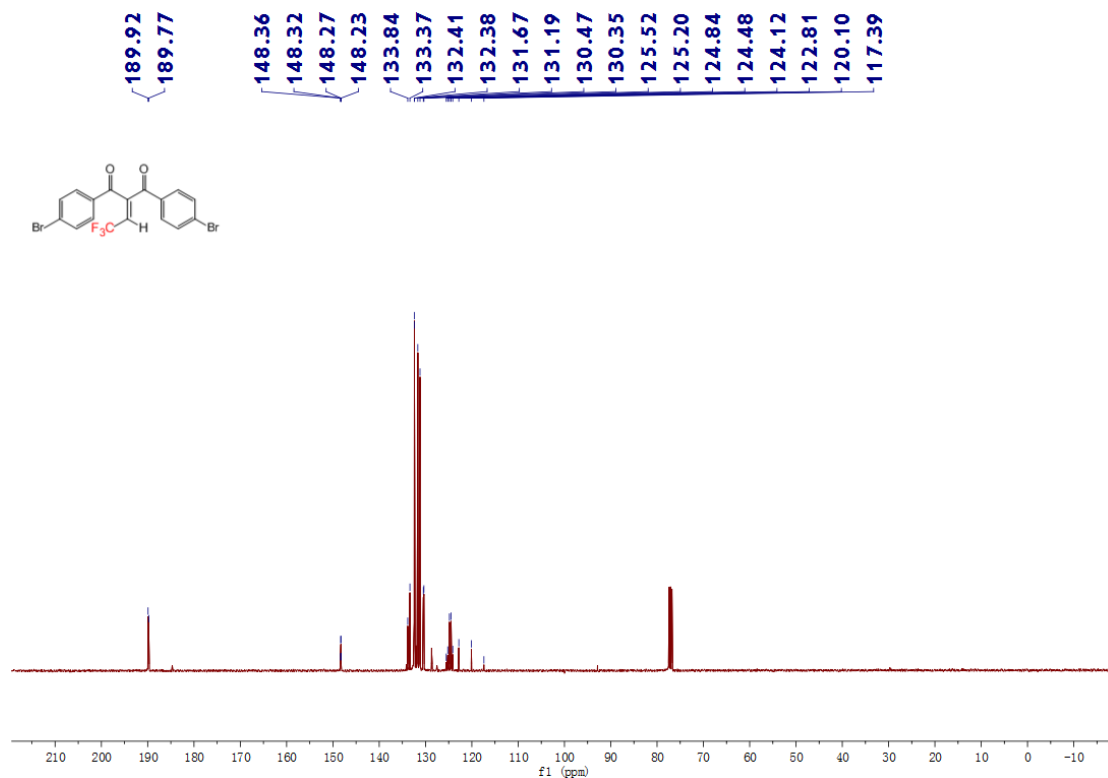

$^{19}\text{F}$ -NMR spectrum of **3k** in  $\text{CDCl}_3$

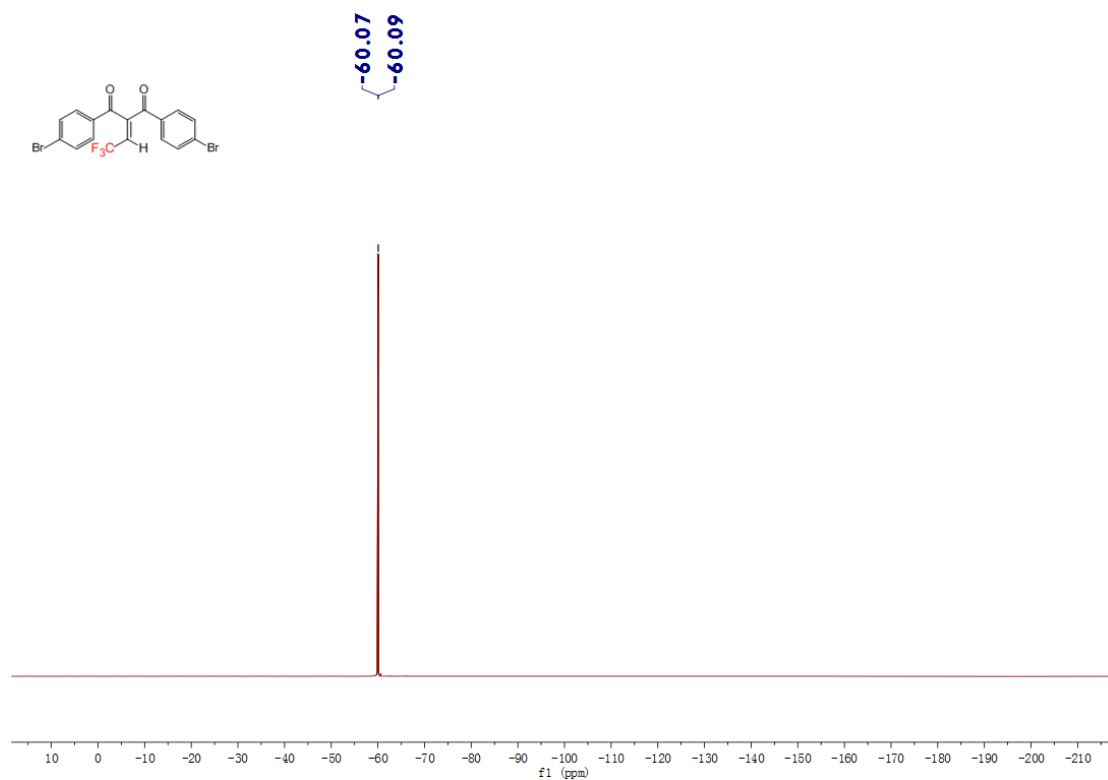

$^1\text{H}$ -NMR spectrum of **3l** in  $\text{CDCl}_3$

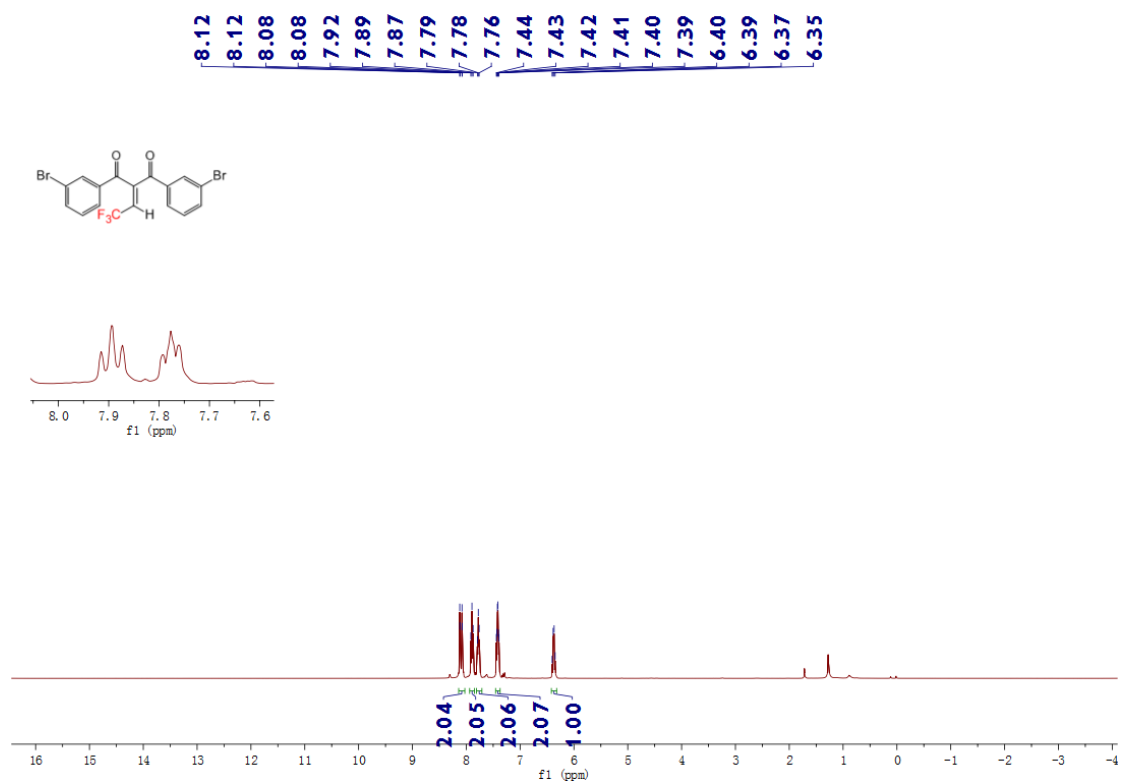

$^{13}\text{C}$ -NMR spectrum of **3l** in  $\text{CDCl}_3$

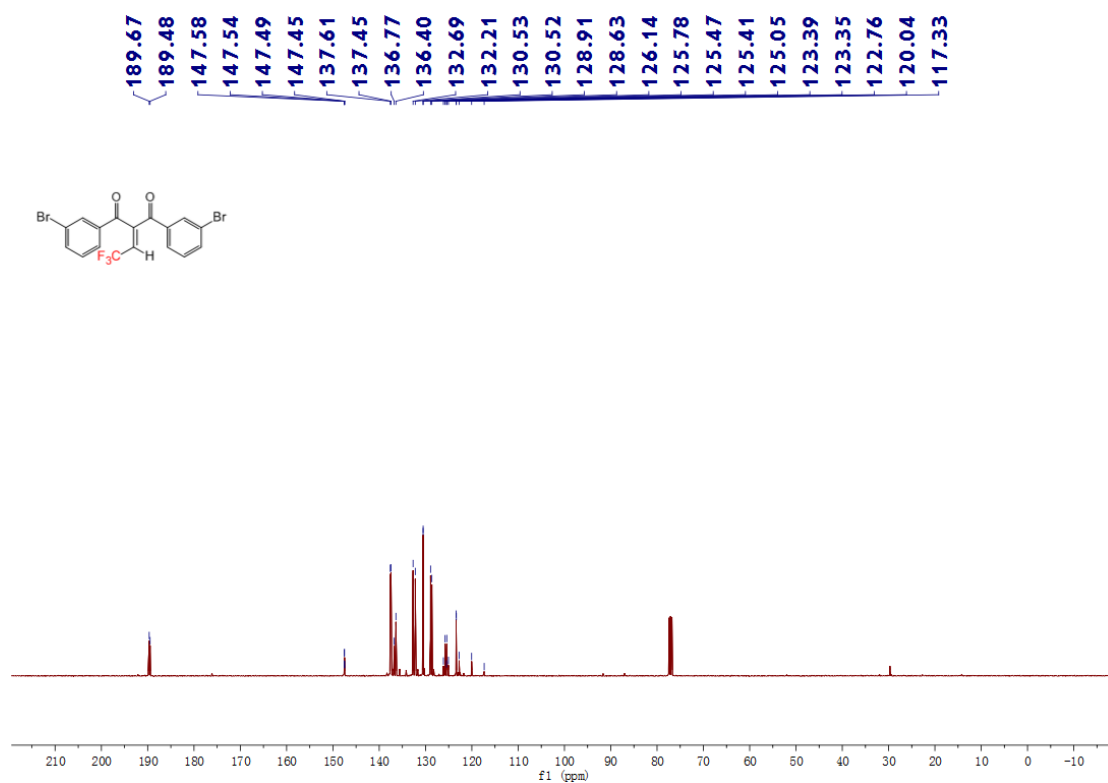

$^{19}\text{F}$ -NMR spectrum of **3l** in  $\text{CDCl}_3$

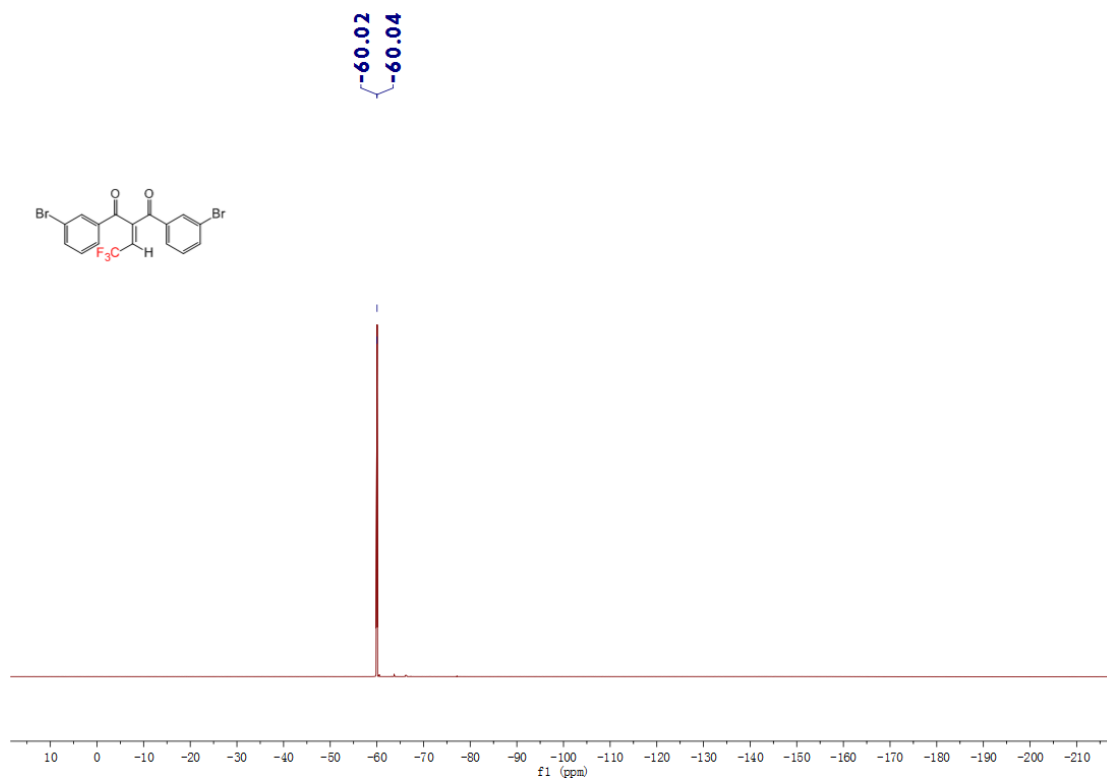

$^1\text{H}$ -NMR spectrum of **3m** in  $\text{CDCl}_3$

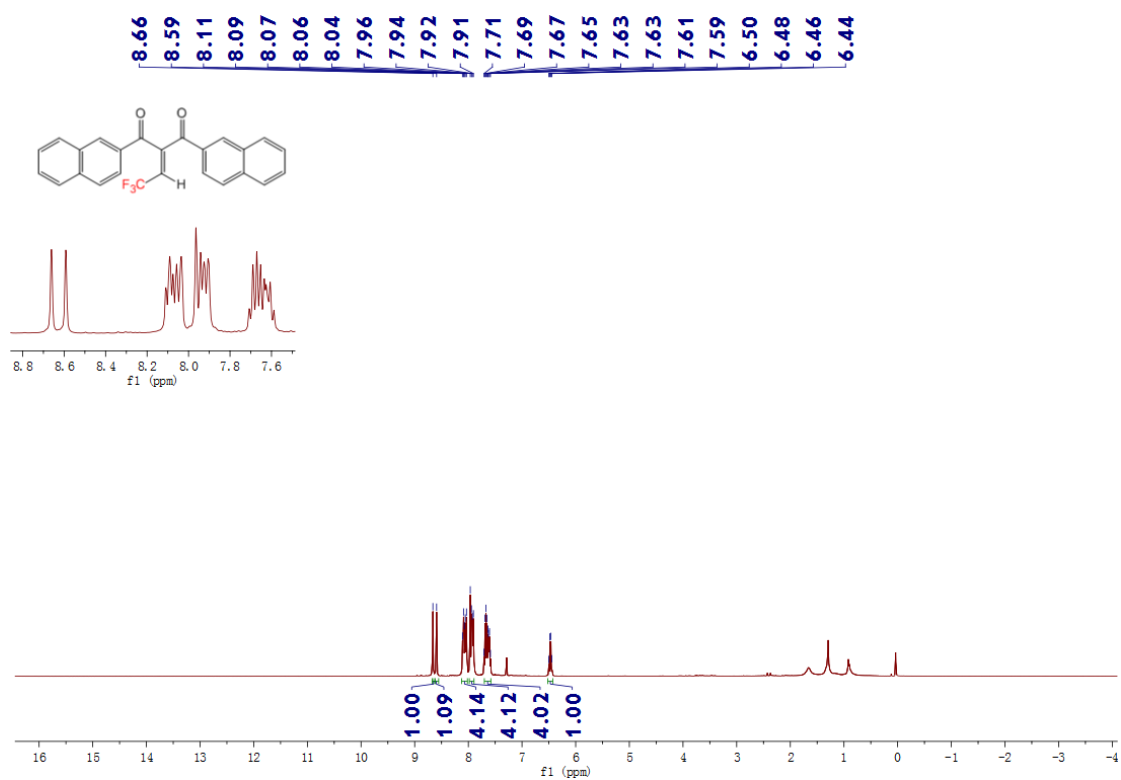

$^{13}\text{C}$ -NMR spectrum of **3m** in  $\text{CDCl}_3$

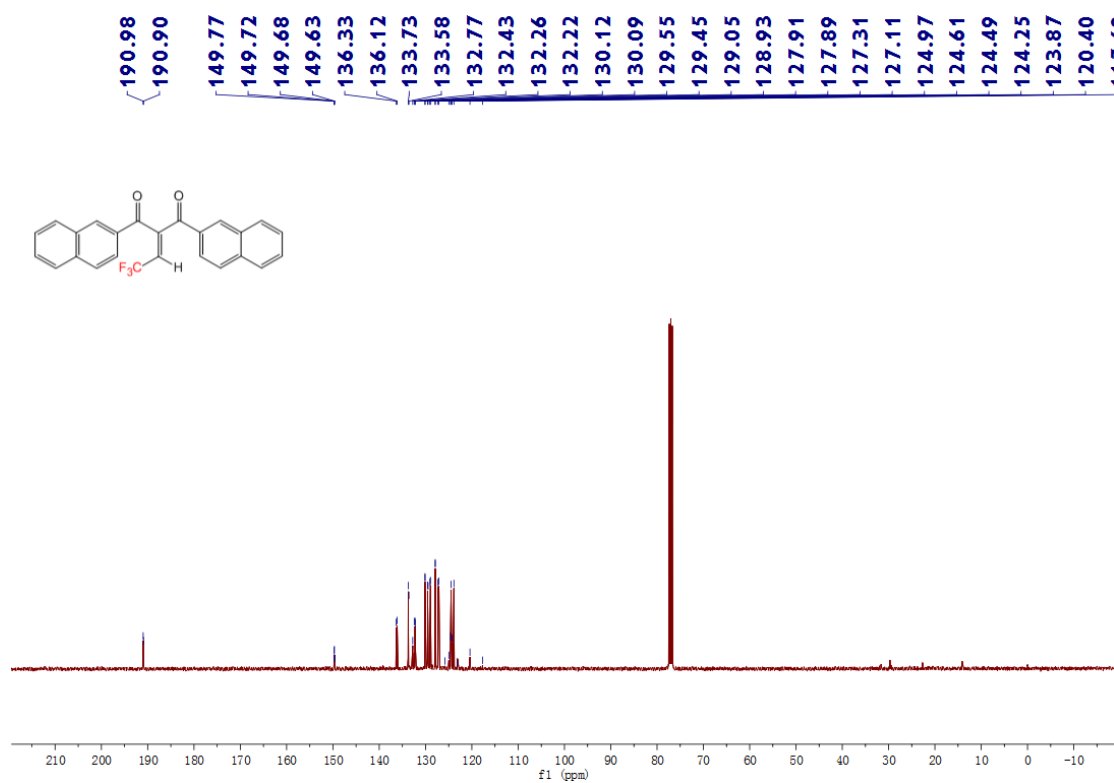

$^{19}\text{F}$ -NMR spectrum of **3m** in  $\text{CDCl}_3$

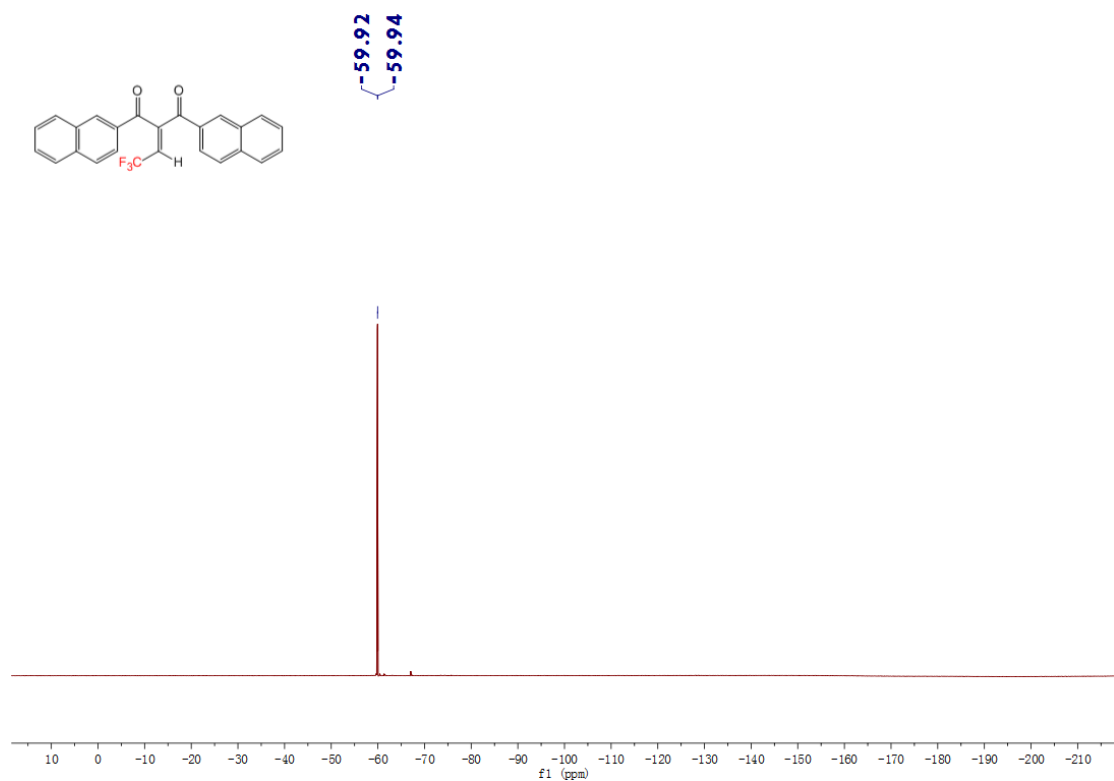

$^1\text{H}$ -NMR spectrum of **3n** in  $\text{CDCl}_3$

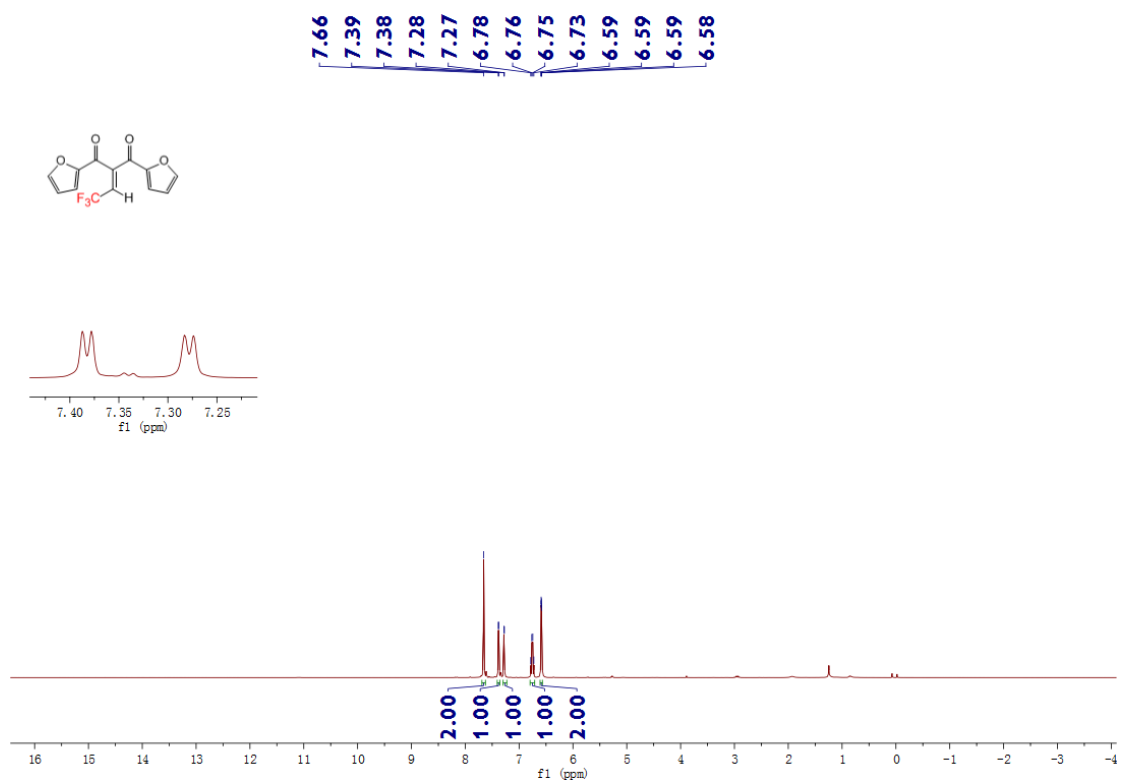

$^{13}\text{C}$ -NMR spectrum of **3n** in  $\text{CDCl}_3$

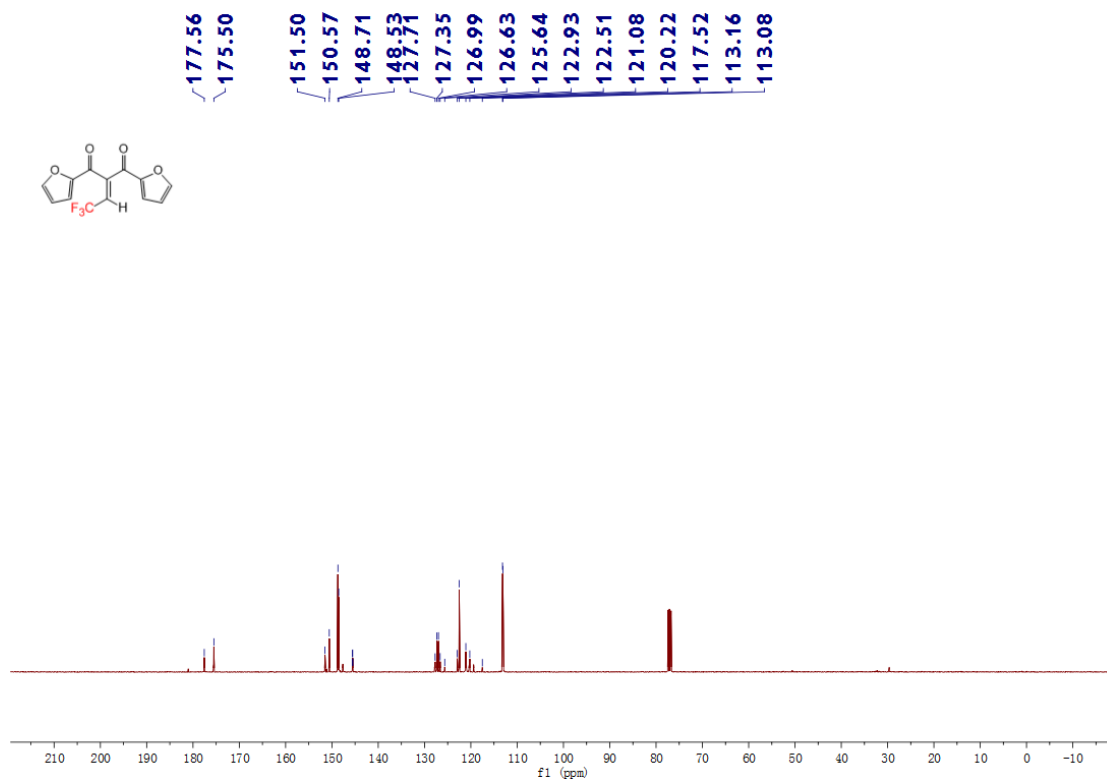

$^{19}\text{F}$ -NMR spectrum of **3n** in  $\text{CDCl}_3$

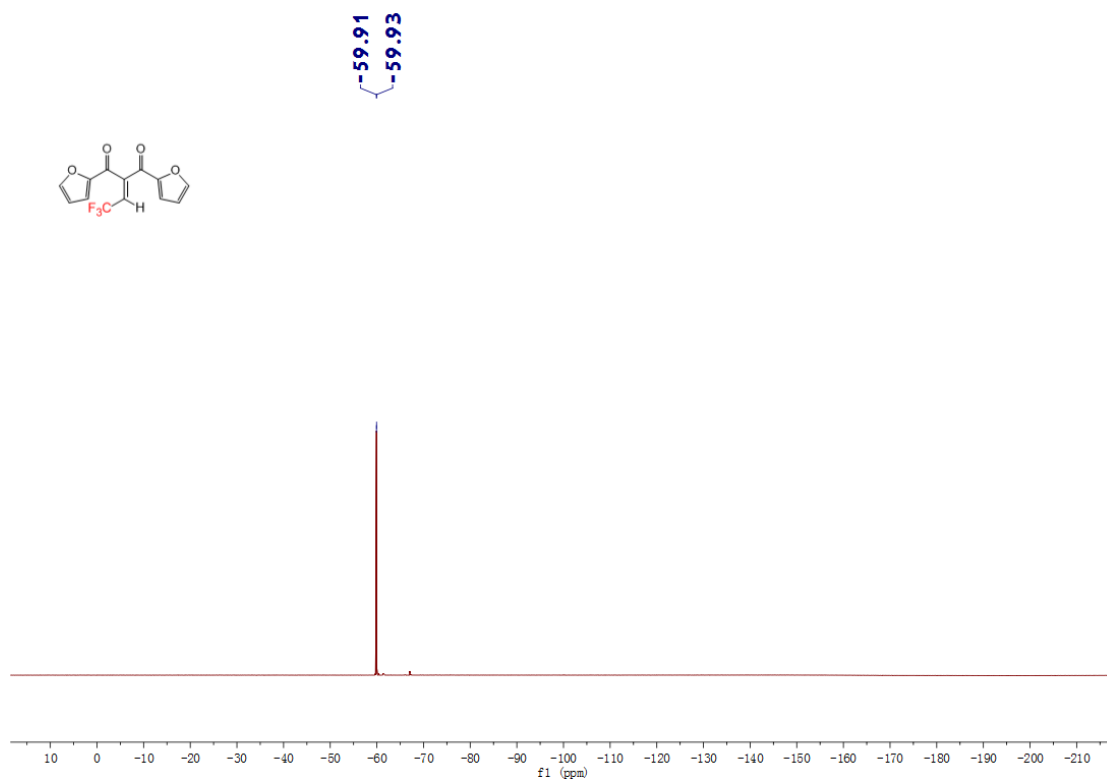

$^1\text{H}$ -NMR spectrum of **3o** in  $\text{CDCl}_3$

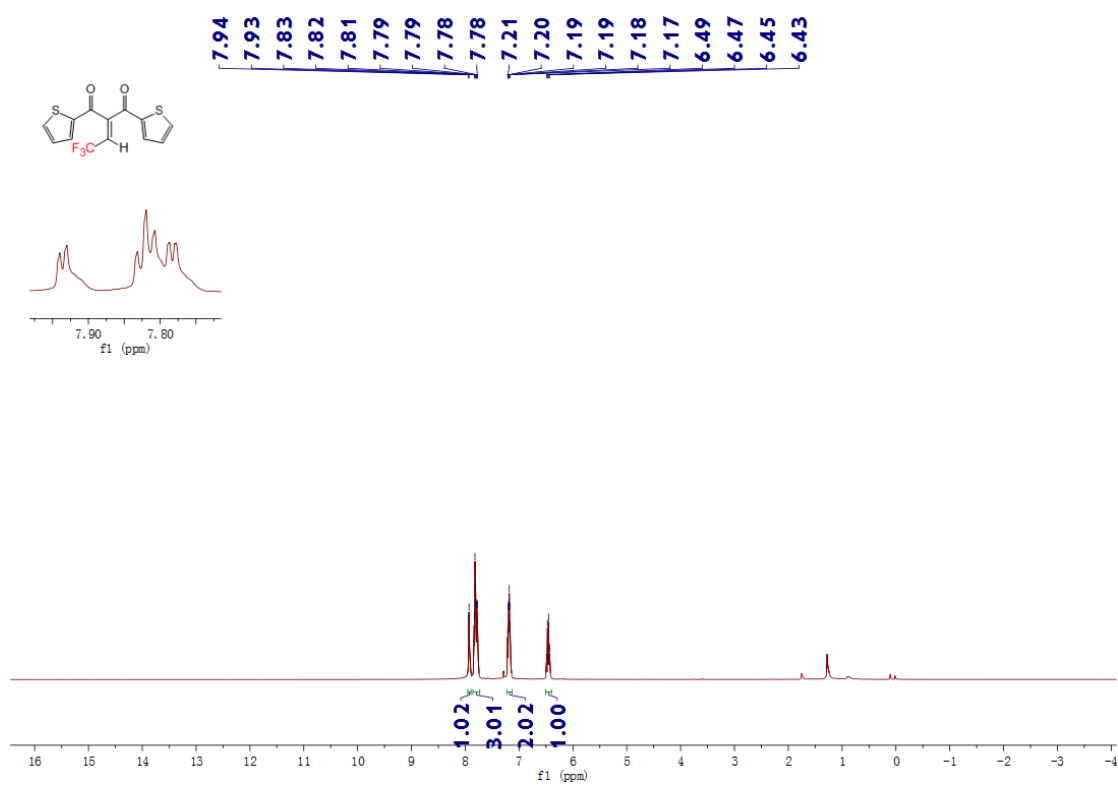



$^{13}\text{C}$ -NMR spectrum of **3o** in  $\text{CDCl}_3$

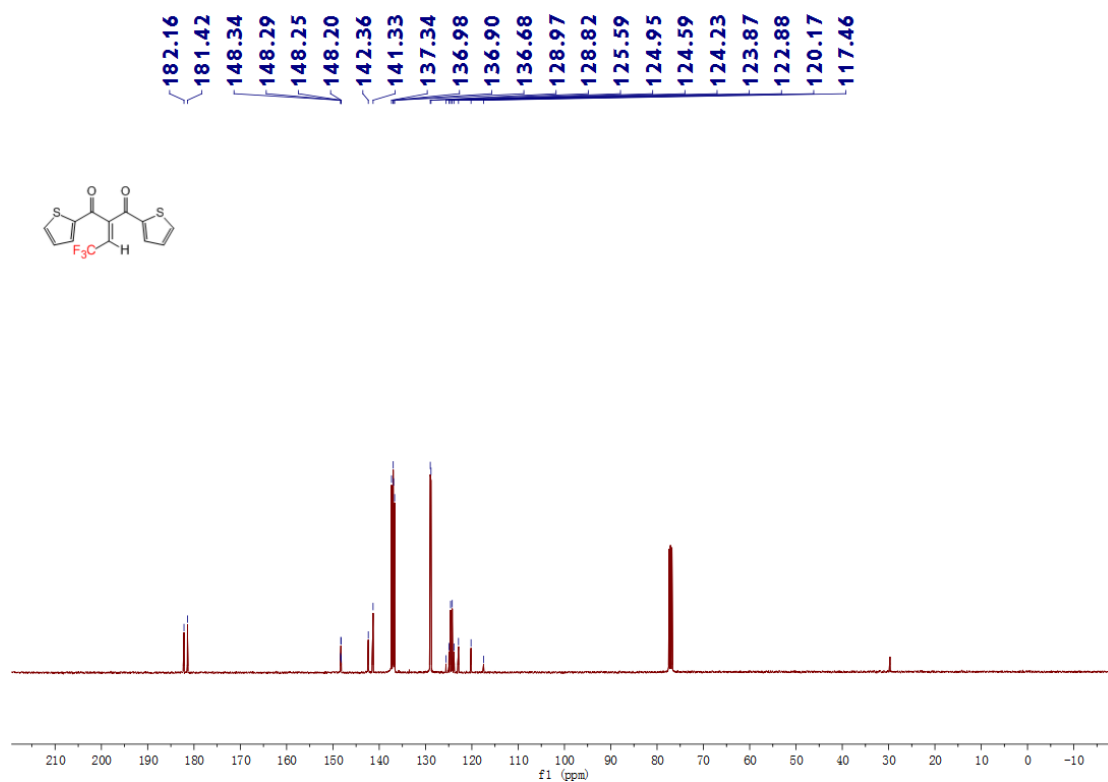

$^{19}\text{F}$ -NMR spectrum of **3o** in  $\text{CDCl}_3$

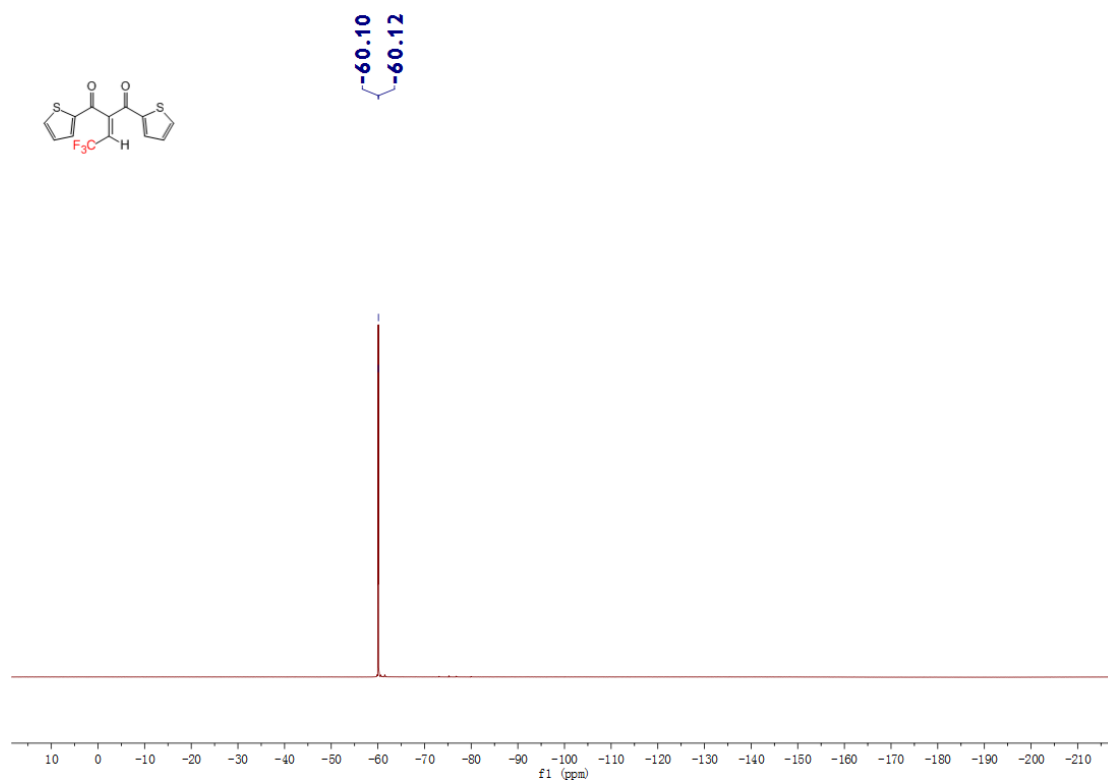

$^1\text{H}$ -NMR spectrum of **3p** in  $\text{CDCl}_3$

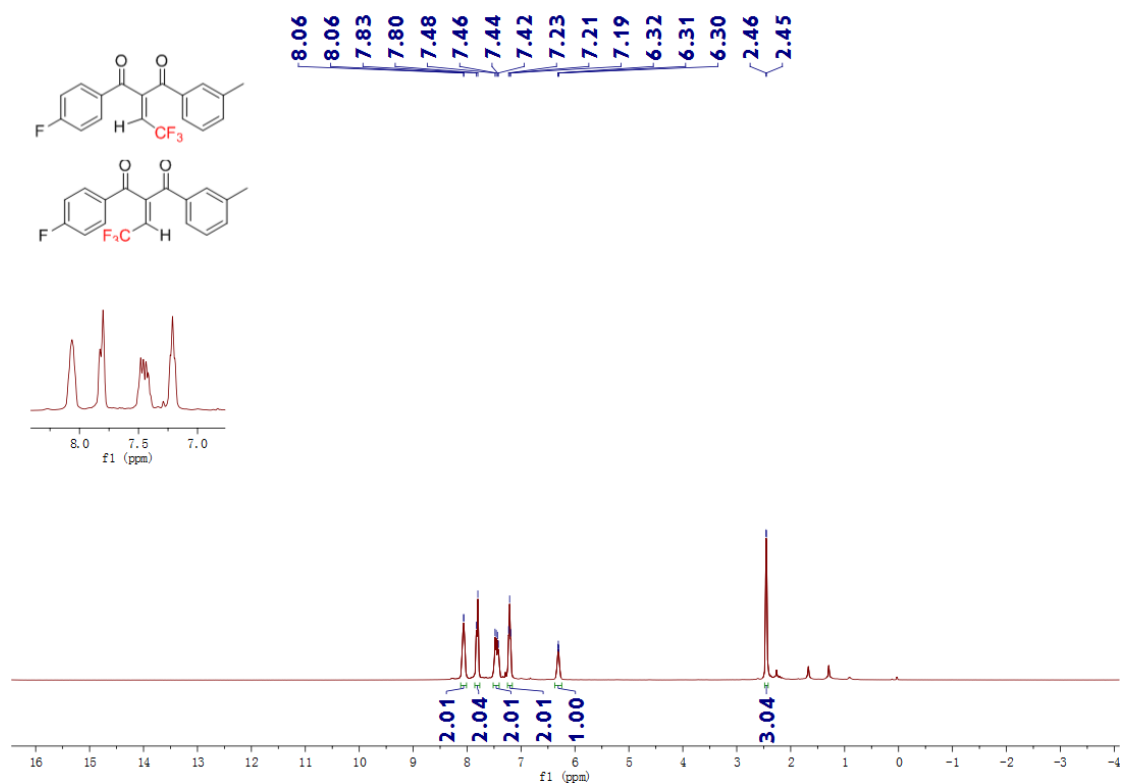

$^{13}\text{C}$ -NMR spectrum of **3p** in  $\text{CDCl}_3$

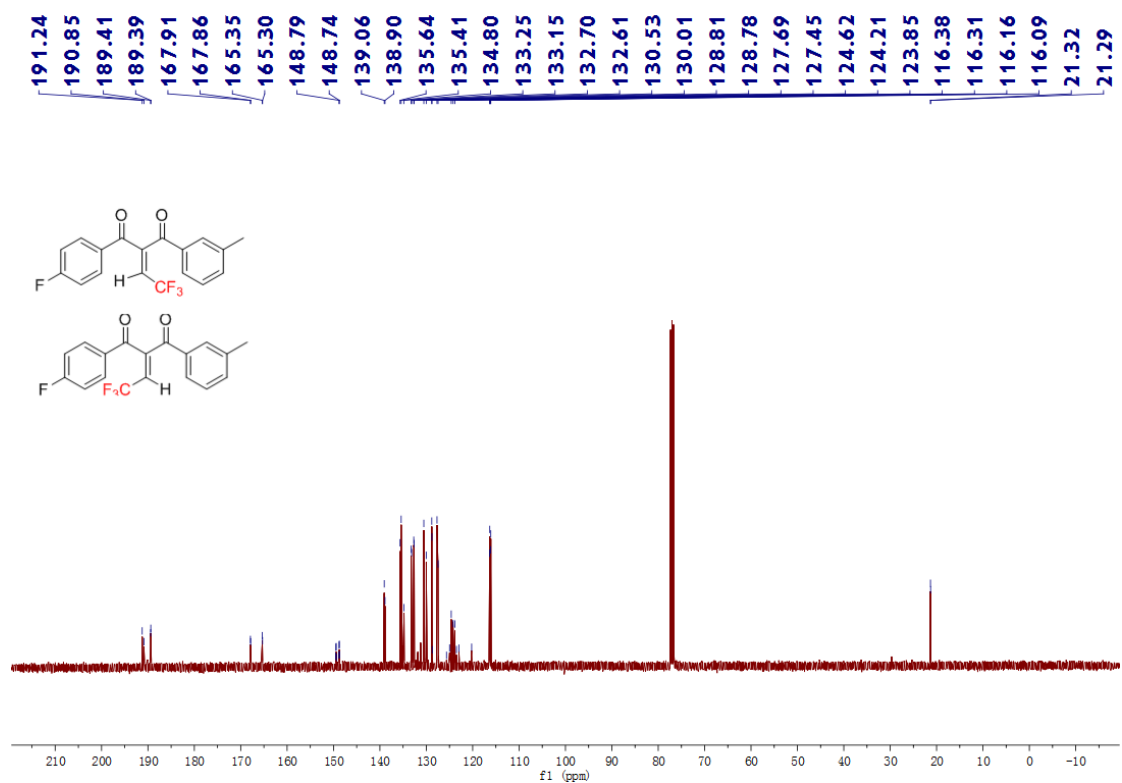

$^{19}\text{F}$ -NMR spectrum of **3p** in  $\text{CDCl}_3$

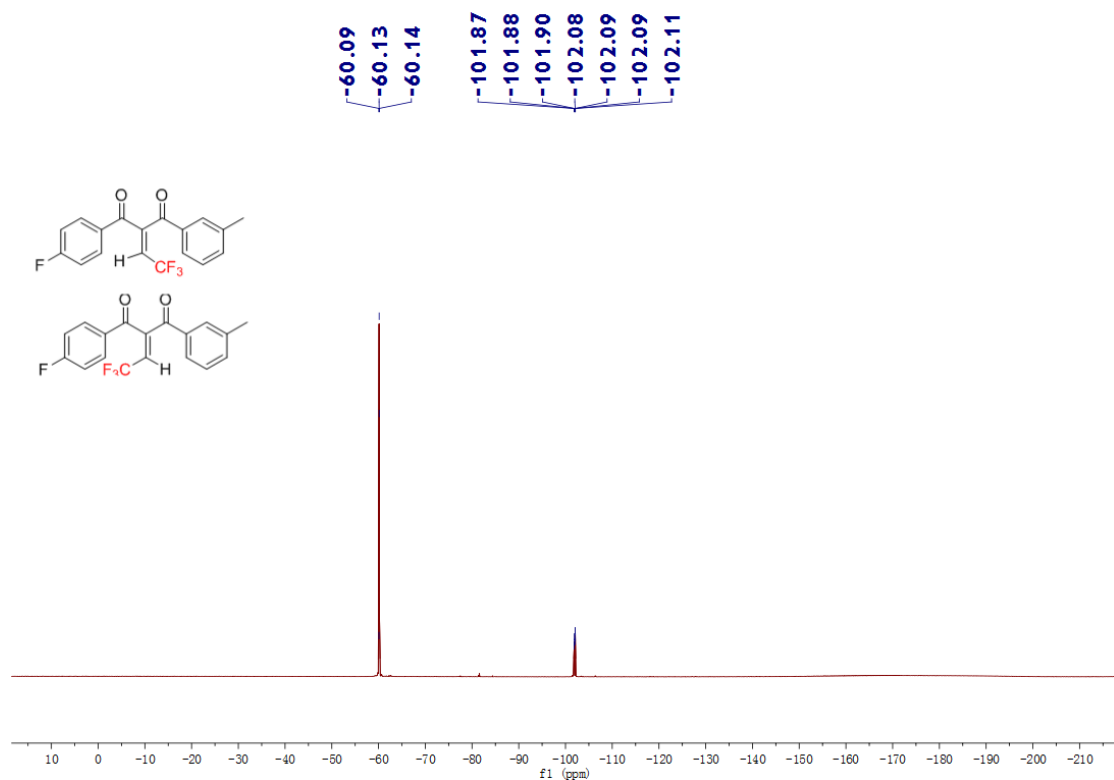

$^1\text{H}$ -NMR spectrum of **3q** in  $\text{CDCl}_3$

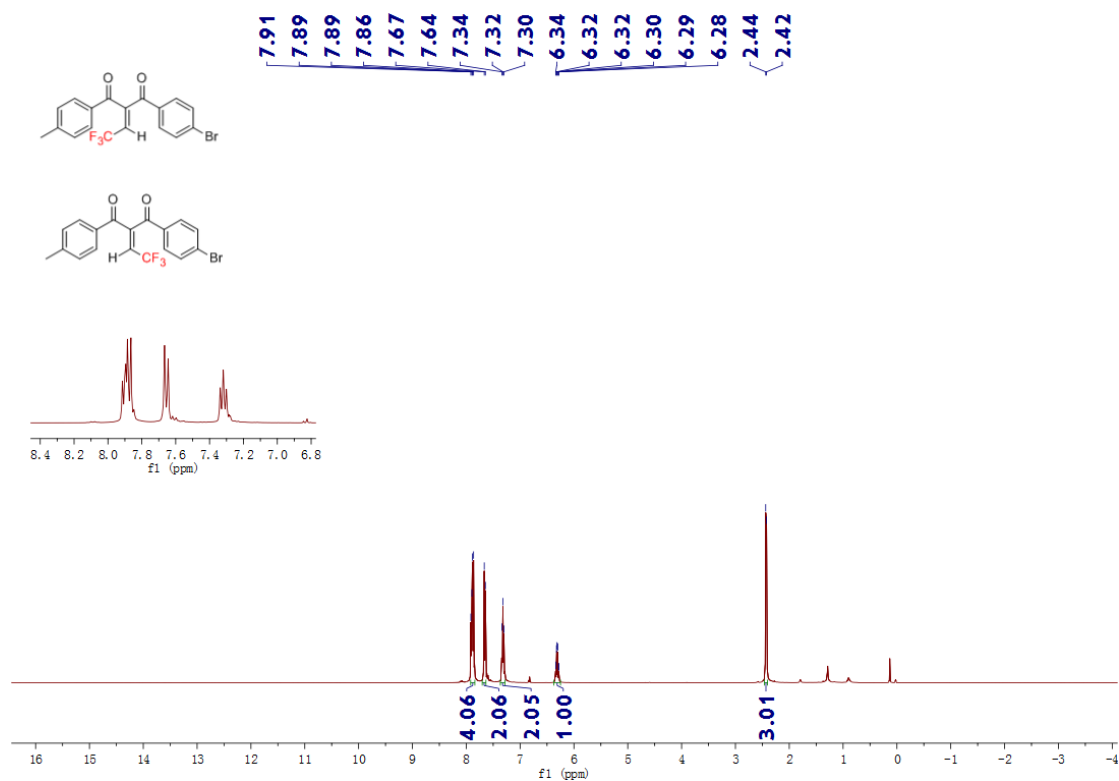

$^{13}\text{C}$ -NMR spectrum of **3q** in  $\text{CDCl}_3$

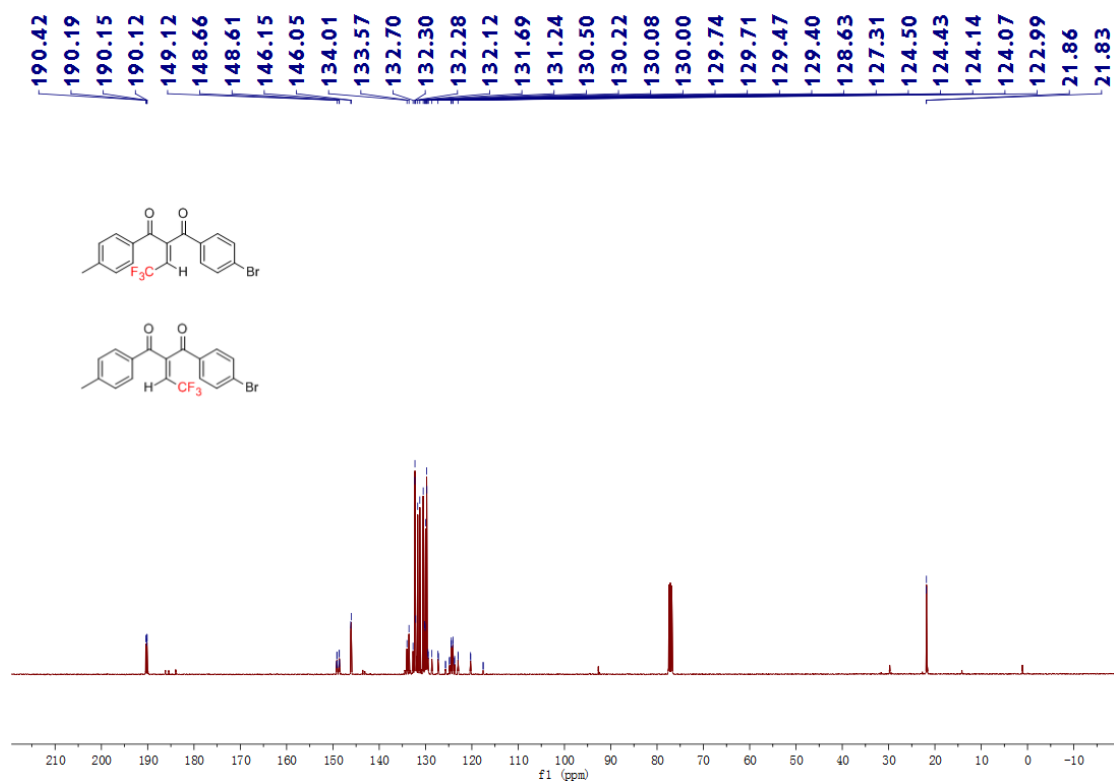

$^{19}\text{F}$ -NMR spectrum of **3q** in  $\text{CDCl}_3$

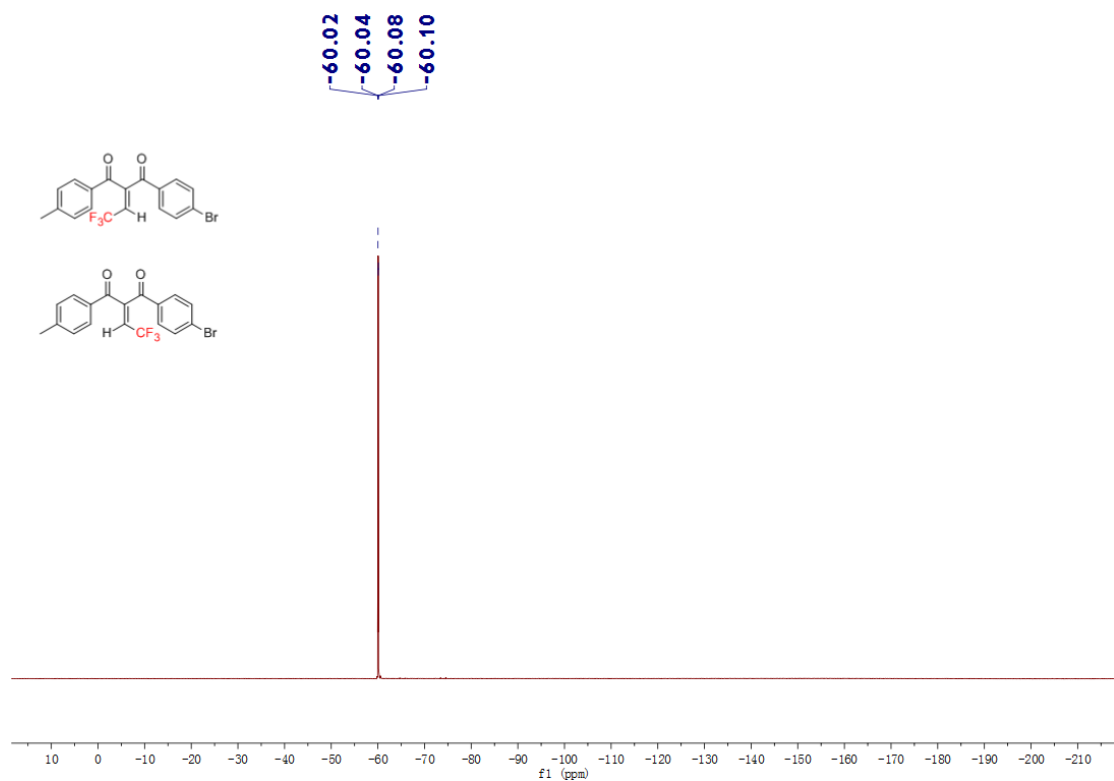

$^1\text{H}$ -NMR spectrum of **3r** in  $\text{CDCl}_3$

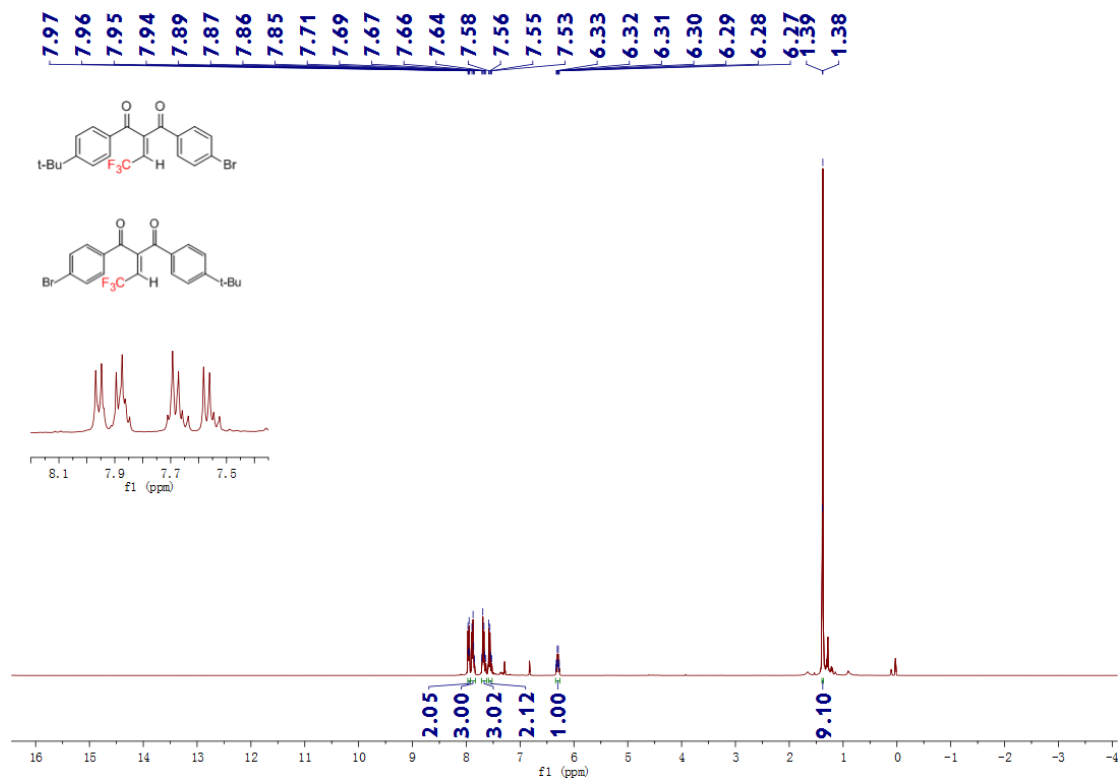

$^{13}\text{C}$ -NMR spectrum of **3r** in  $\text{CDCl}_3$

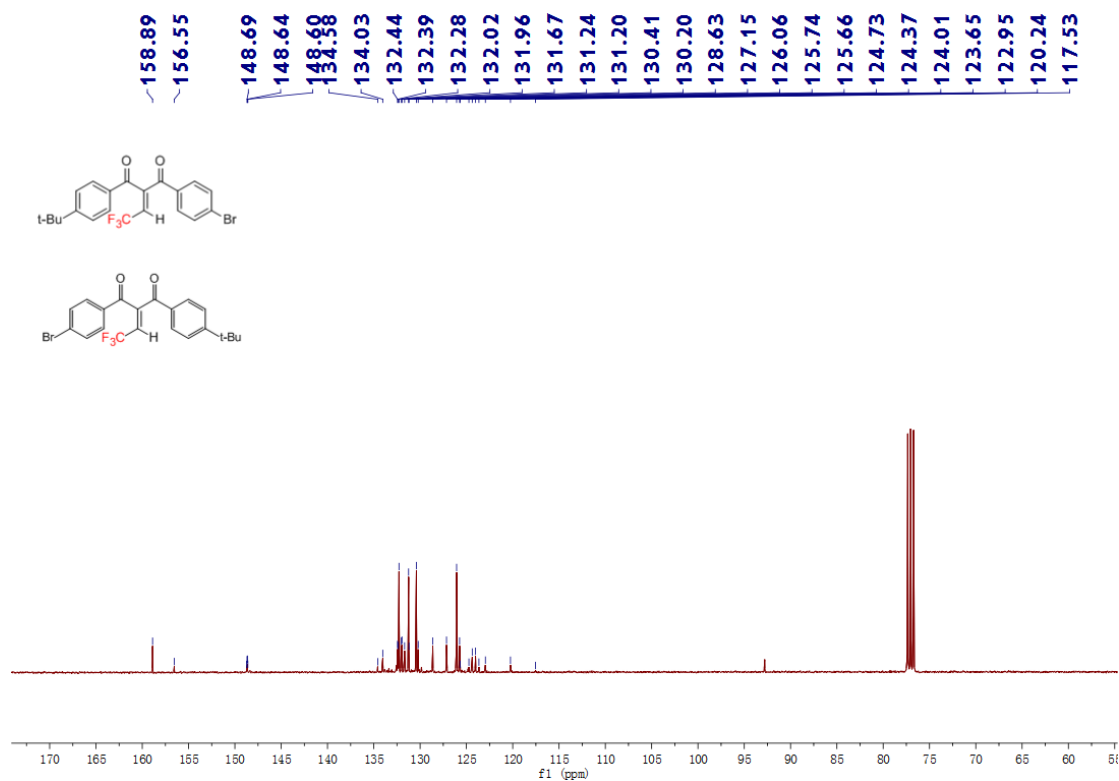

$^{19}\text{F}$ -NMR spectrum of **3r** in  $\text{CDCl}_3$

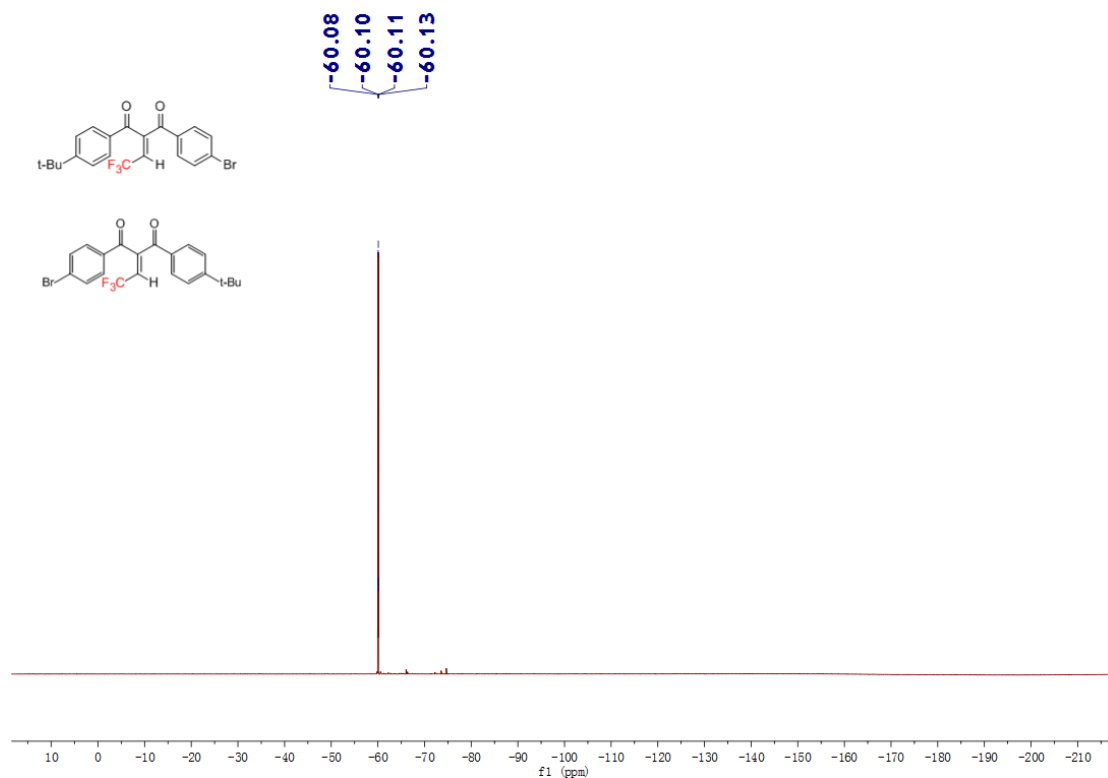

$^1\text{H}$ -NMR spectrum of **3s** in  $\text{CDCl}_3$

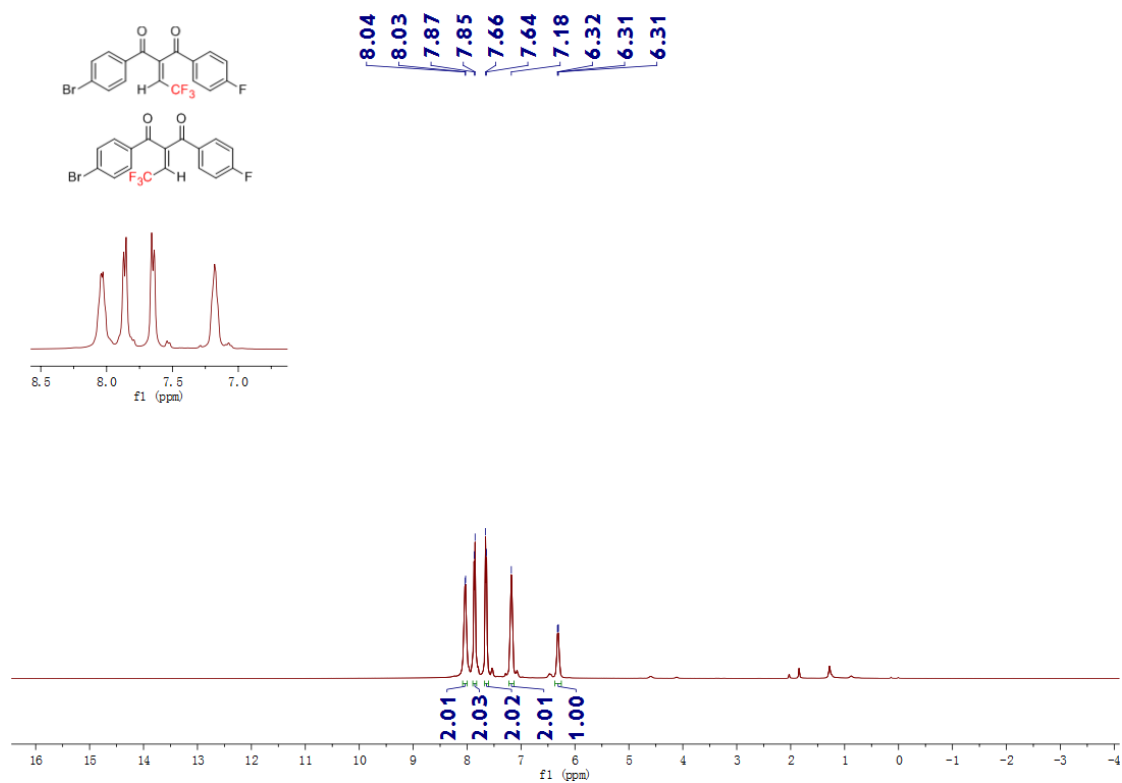

$^{13}\text{C}$ -NMR spectrum of **3s** in  $\text{CDCl}_3$

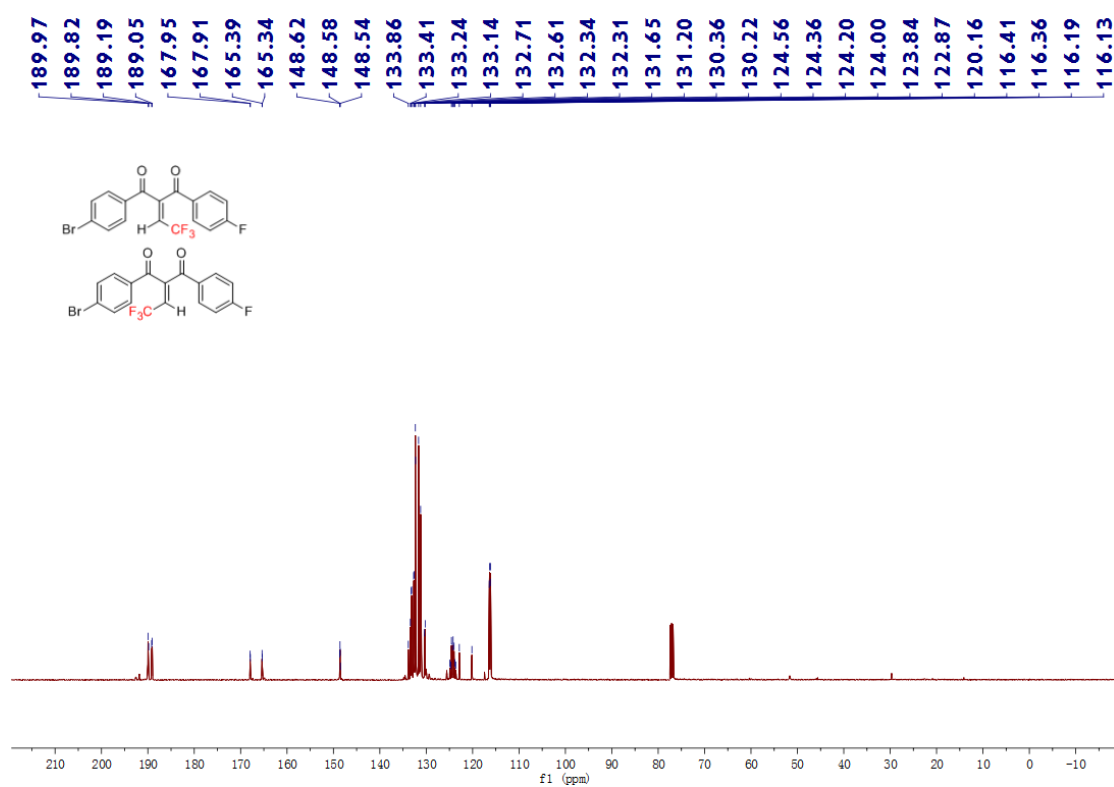

$^{19}\text{F}$ -NMR spectrum of **3s** in  $\text{CDCl}_3$

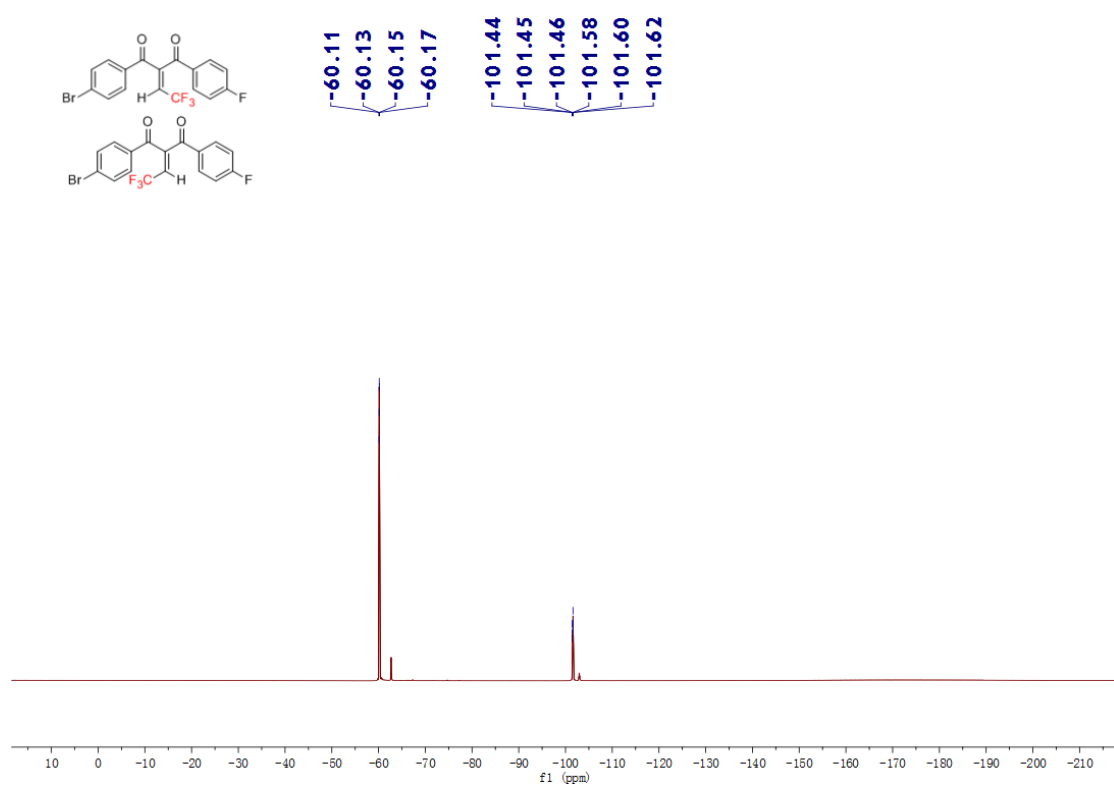

$^1\text{H}$ -NMR spectrum of **3t** in  $\text{CDCl}_3$

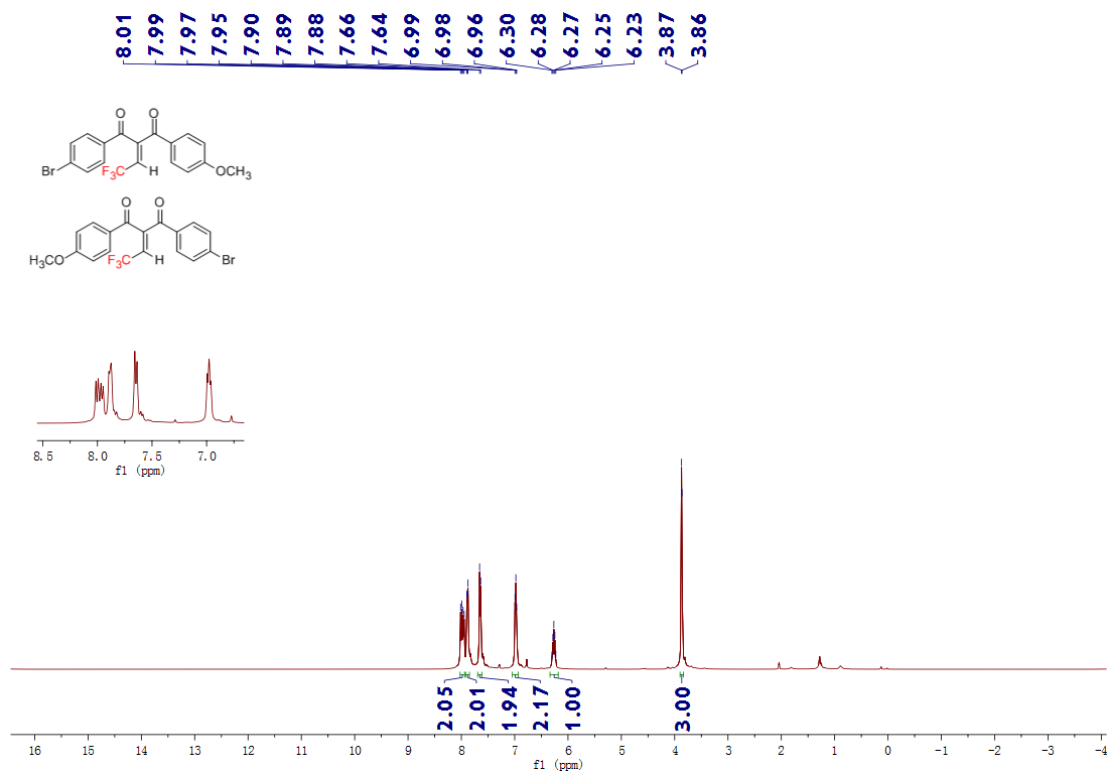

$^{13}\text{C}$ -NMR spectrum of **3t** in  $\text{CDCl}_3$

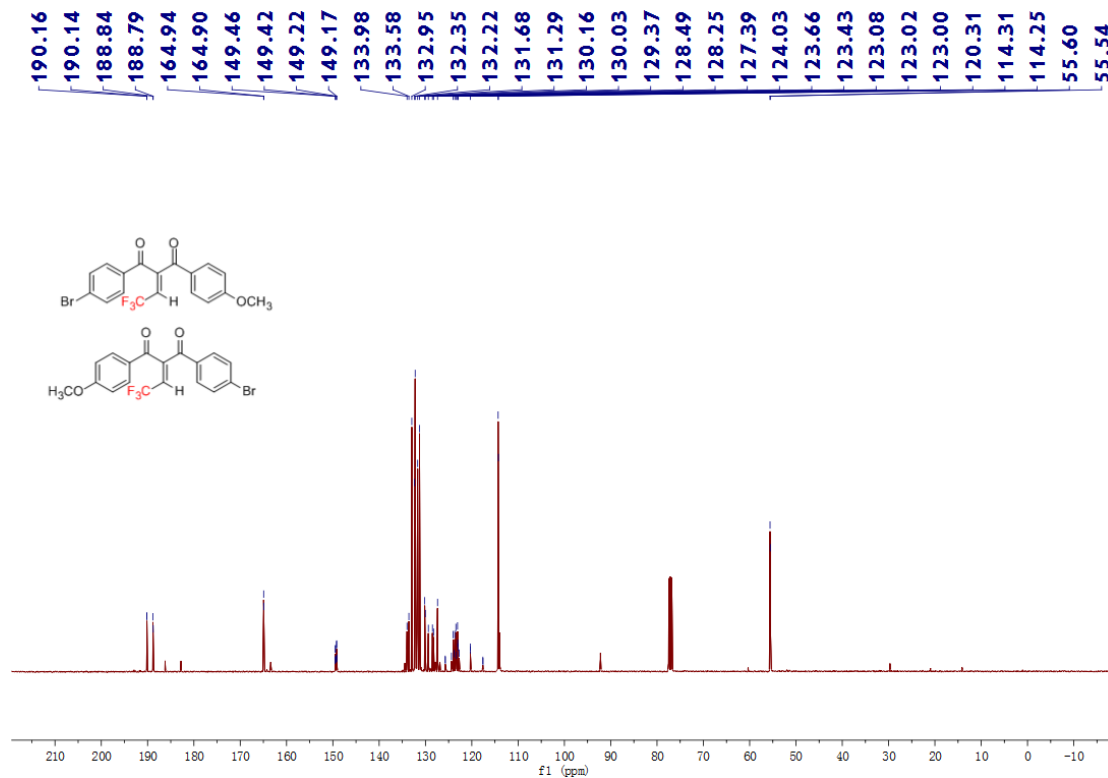



$^{19}\text{F}$ -NMR spectrum of **3t** in  $\text{CDCl}_3$

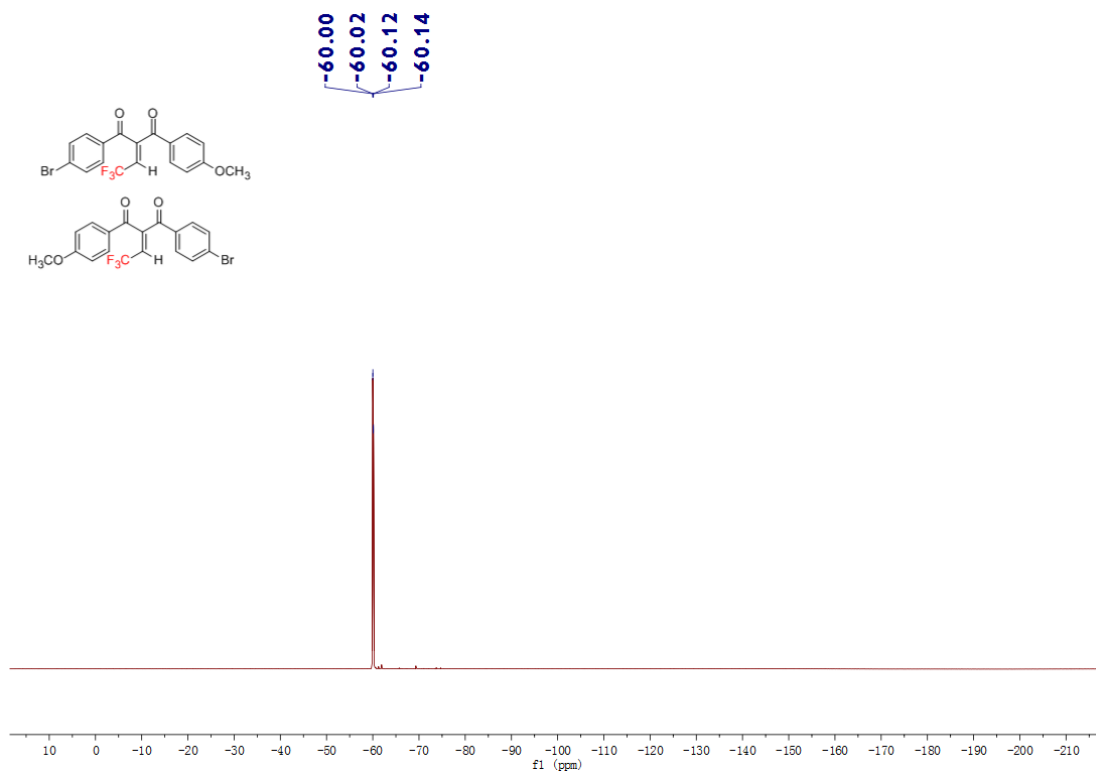

$^1\text{H}$ -NMR spectrum of **3u** in  $\text{CDCl}_3$

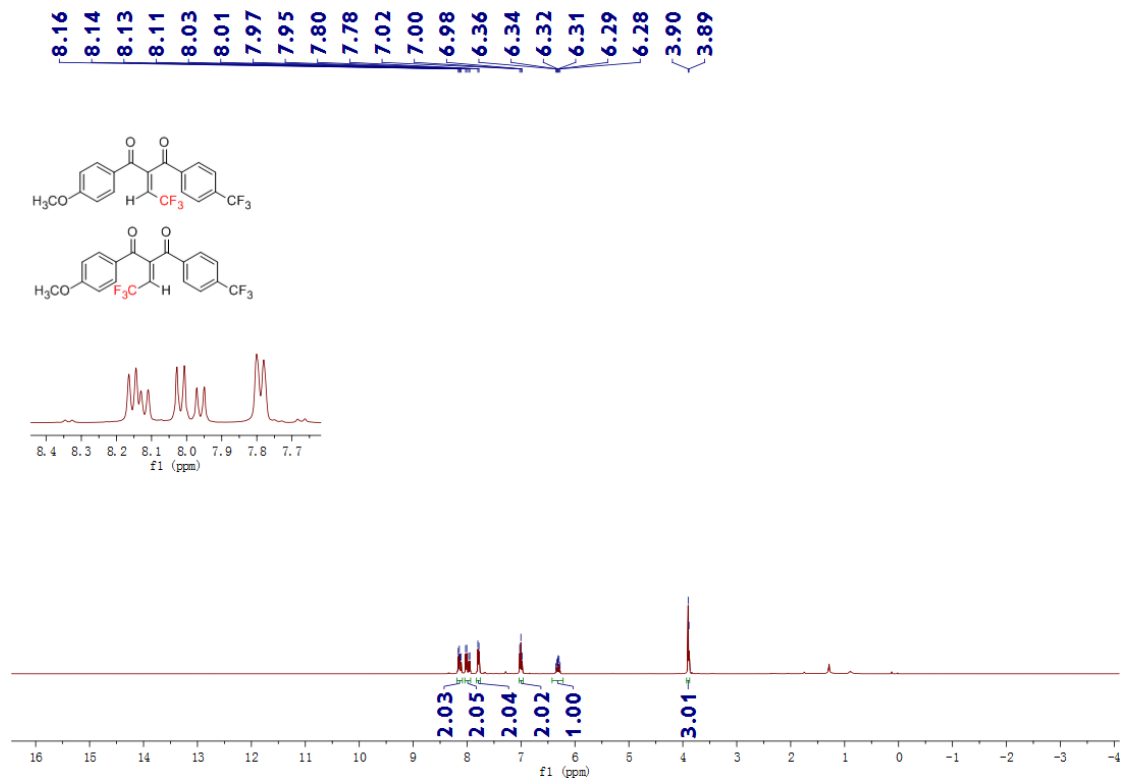

$^{13}\text{C}$ -NMR spectrum of **3u** in  $\text{CDCl}_3$

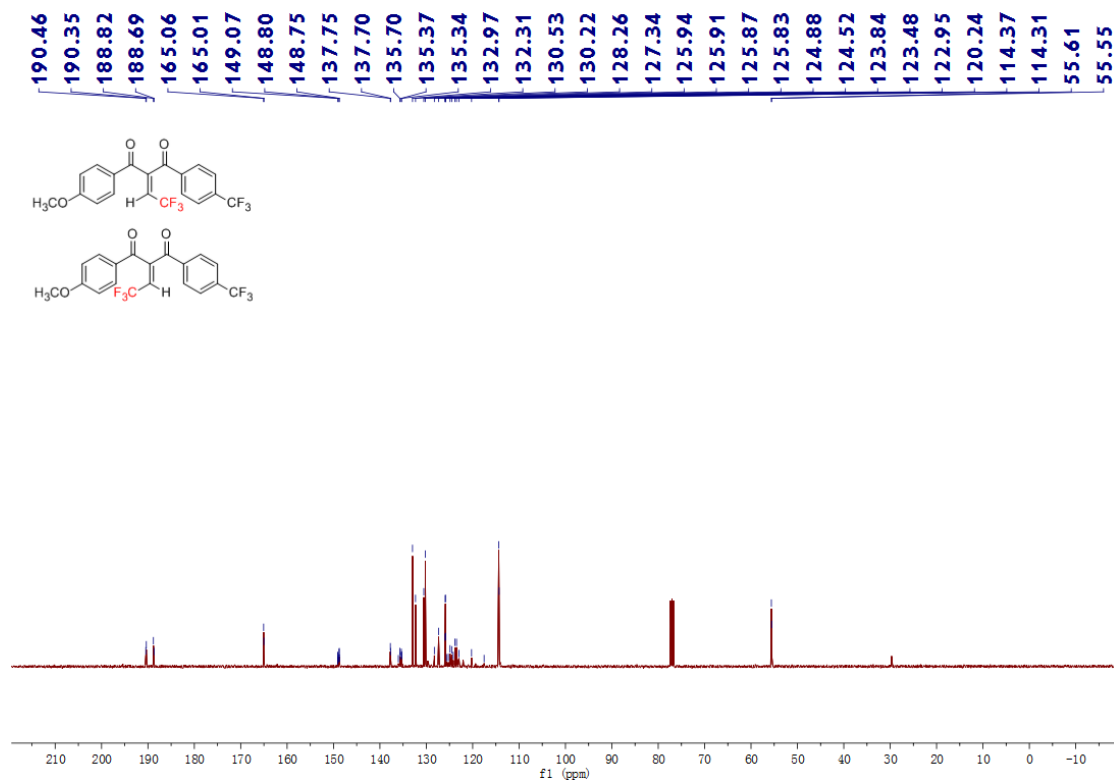

$^{19}\text{F}$ -NMR spectrum of **3u** in  $\text{CDCl}_3$

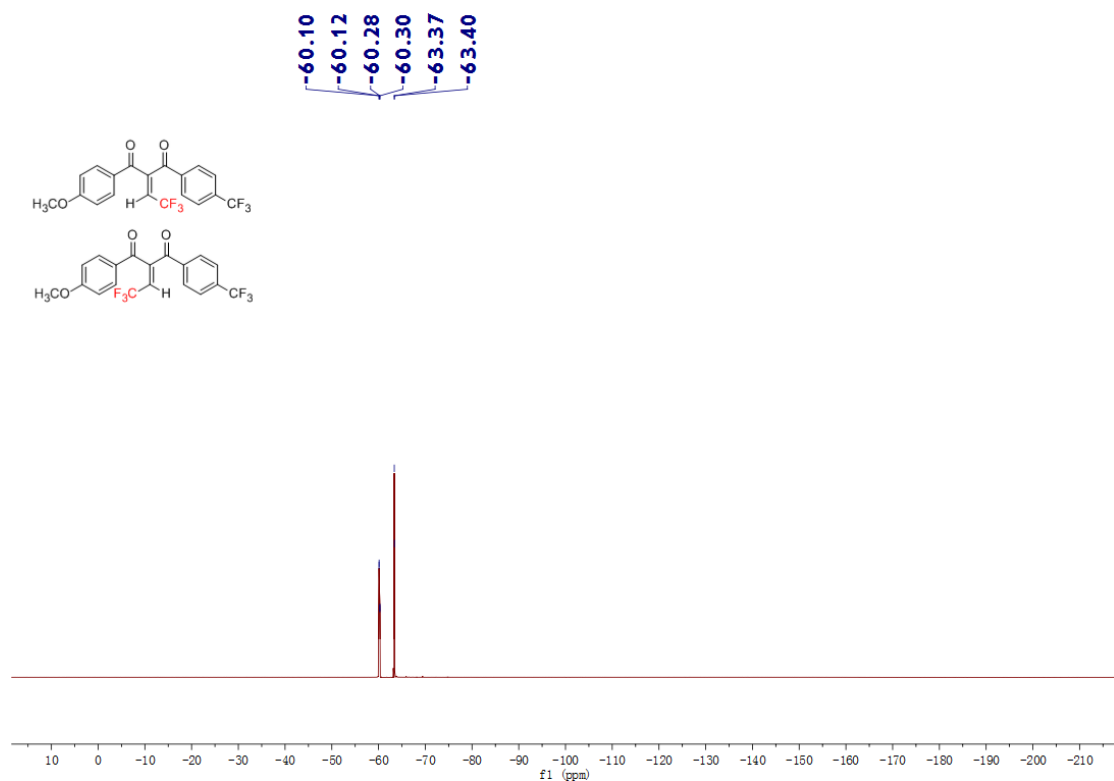

$^1\text{H}$ -NMR spectrum of **3v** in  $\text{CDCl}_3$

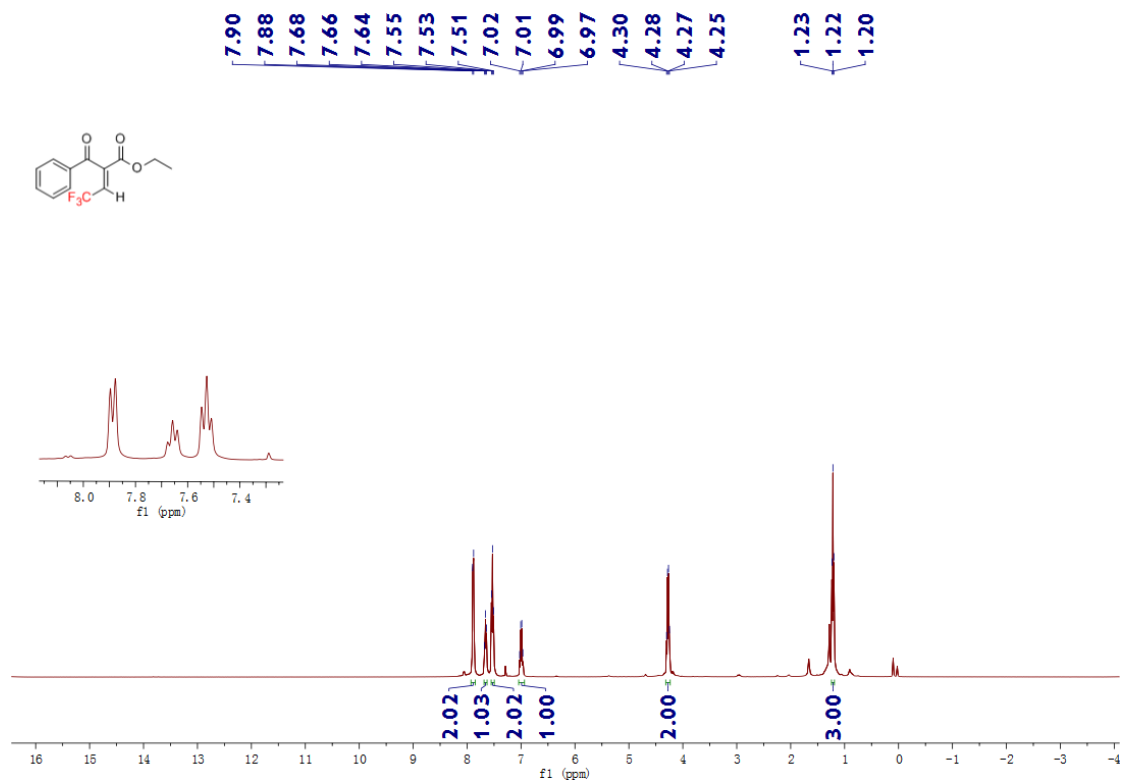

$^{13}\text{C}$ -NMR spectrum of **3v** in  $\text{CDCl}_3$

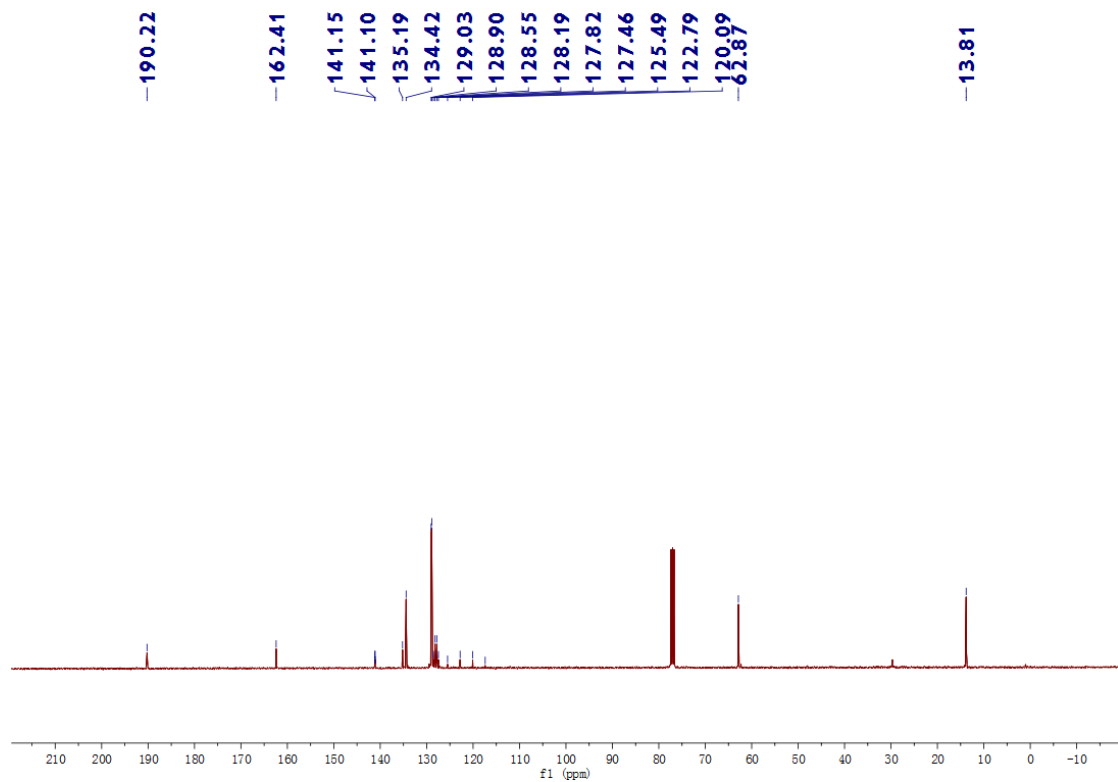

$^{19}\text{F}$ -NMR spectrum of **3v** in  $\text{CDCl}_3$

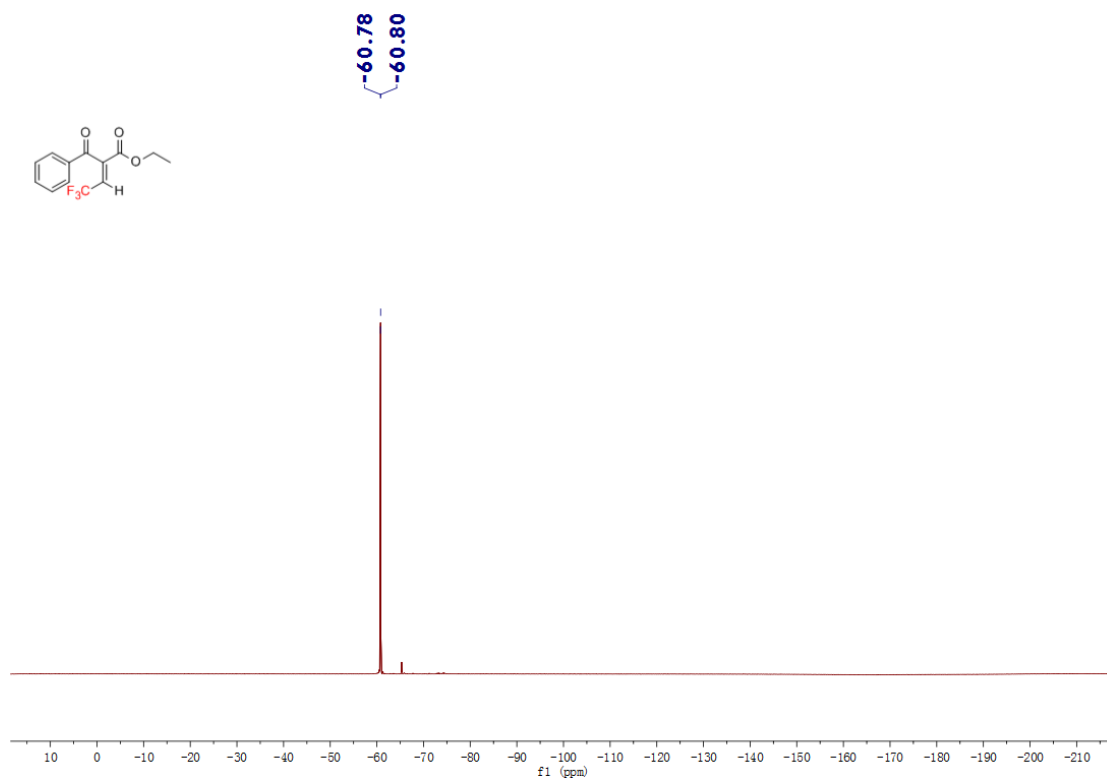

$^1\text{H}$ -NMR spectrum of **3w** in  $\text{CDCl}_3$

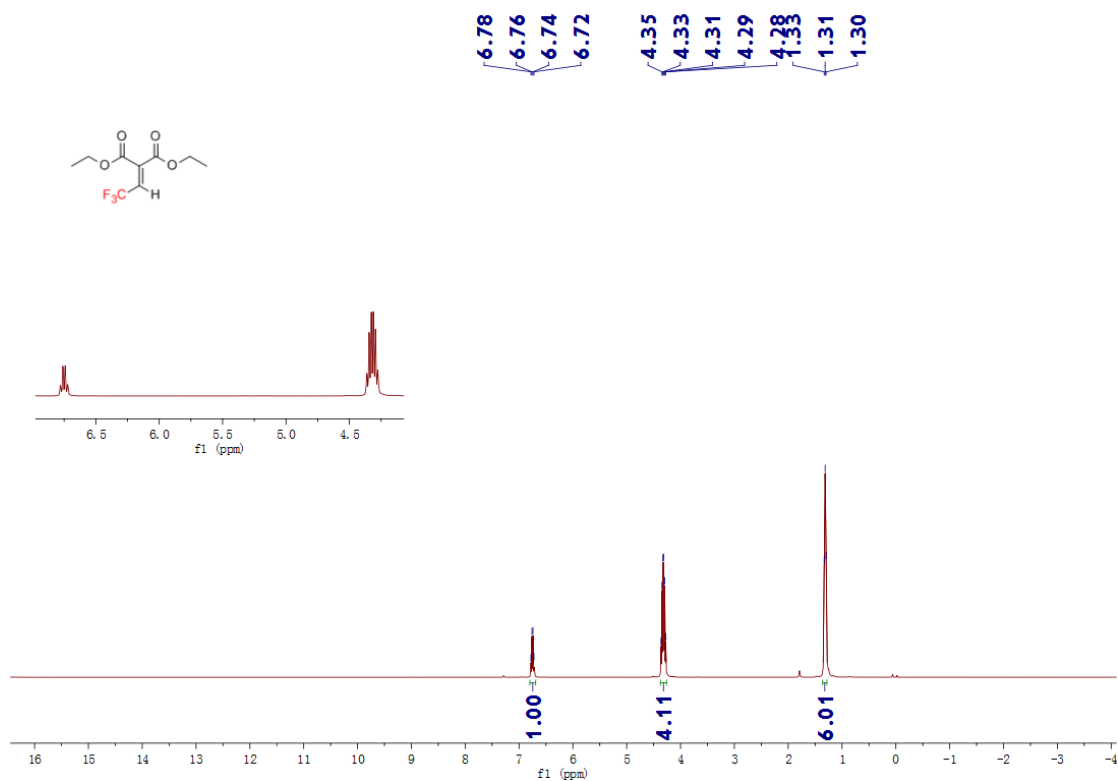

$^{13}\text{C}$ -NMR spectrum of **3w** in  $\text{CDCl}_3$

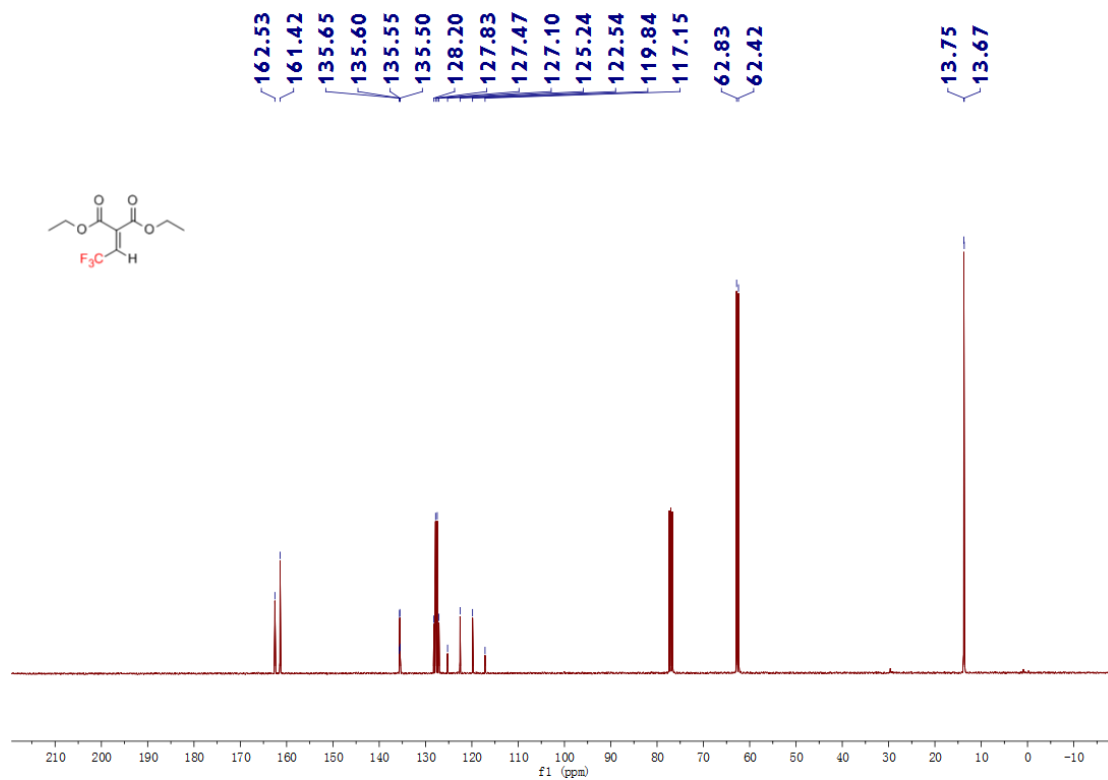

$^{19}\text{F}$ -NMR spectrum of **3w** in  $\text{CDCl}_3$

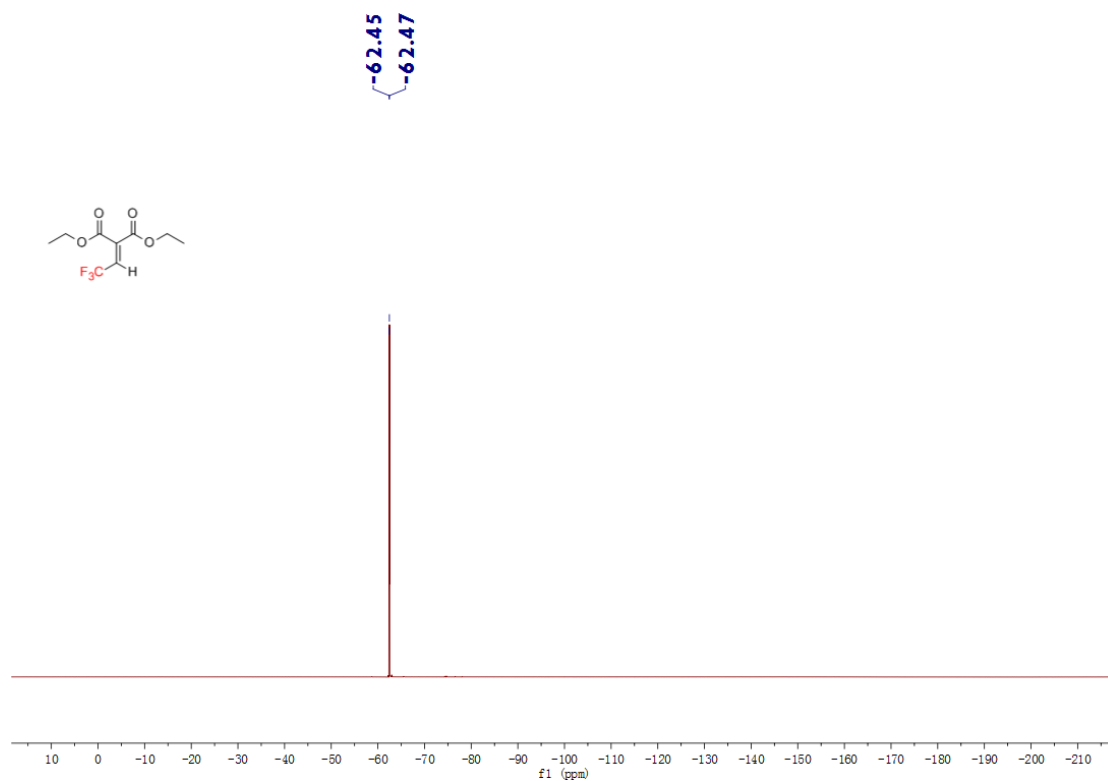

$^1\text{H}$ -NMR spectrum of **3x** in  $\text{CDCl}_3$

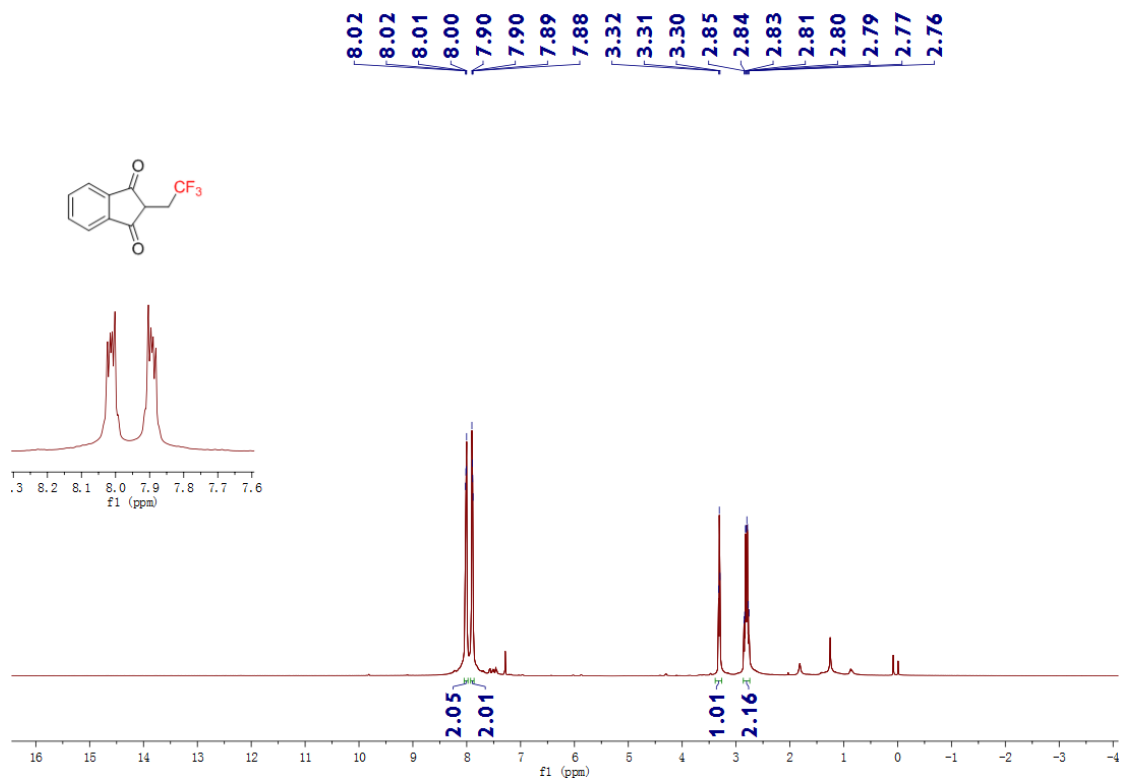

$^{13}\text{C}$ -NMR spectrum of **3x** in  $\text{CDCl}_3$

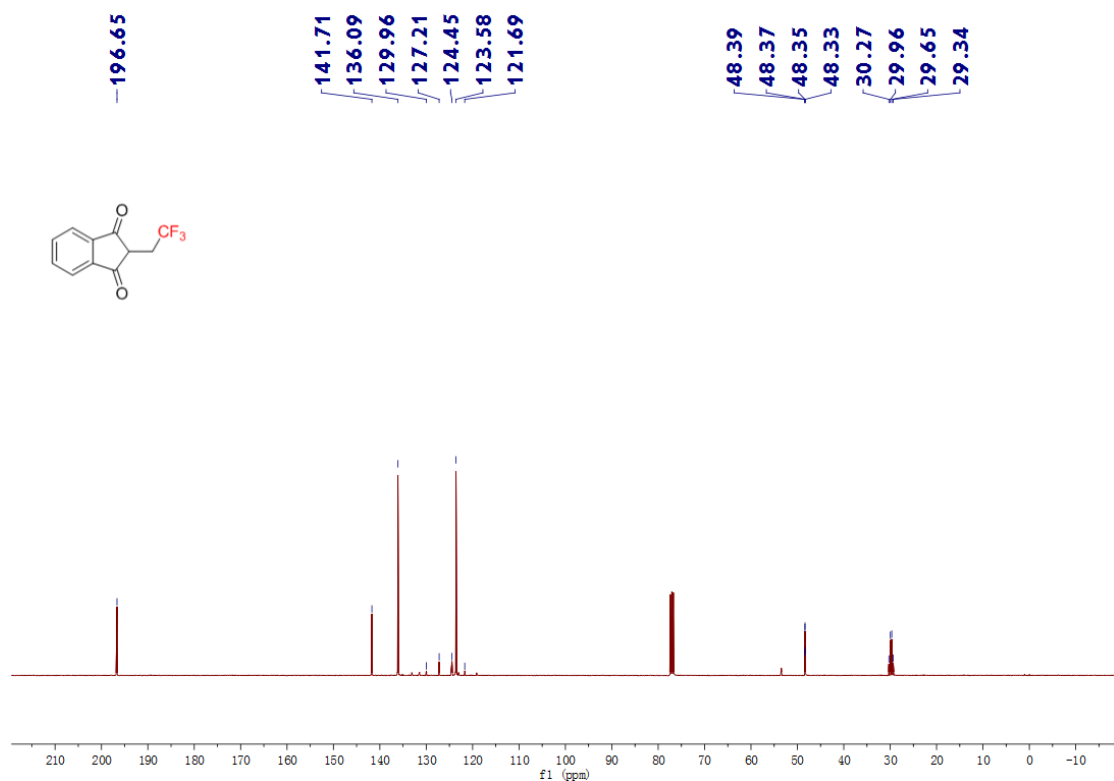

$^{19}\text{F}$ -NMR spectrum of **3x** in  $\text{CDCl}_3$

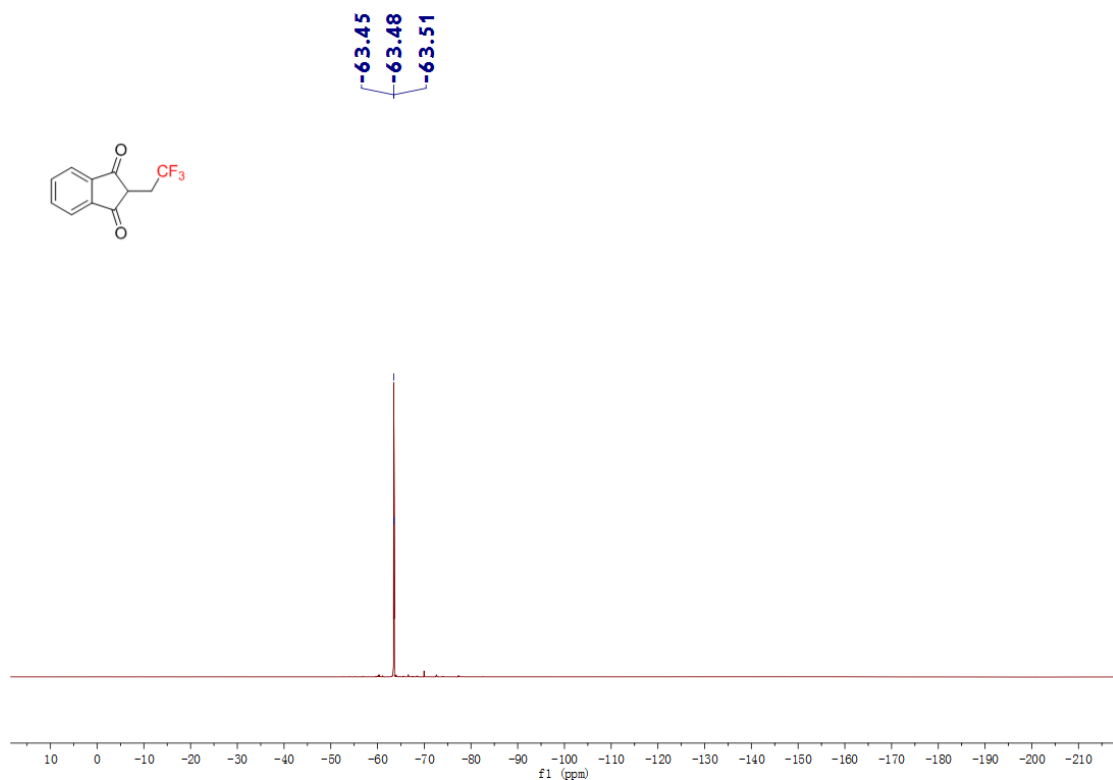

$^1\text{H}$ -NMR spectrum of **4a** in  $\text{CDCl}_3$

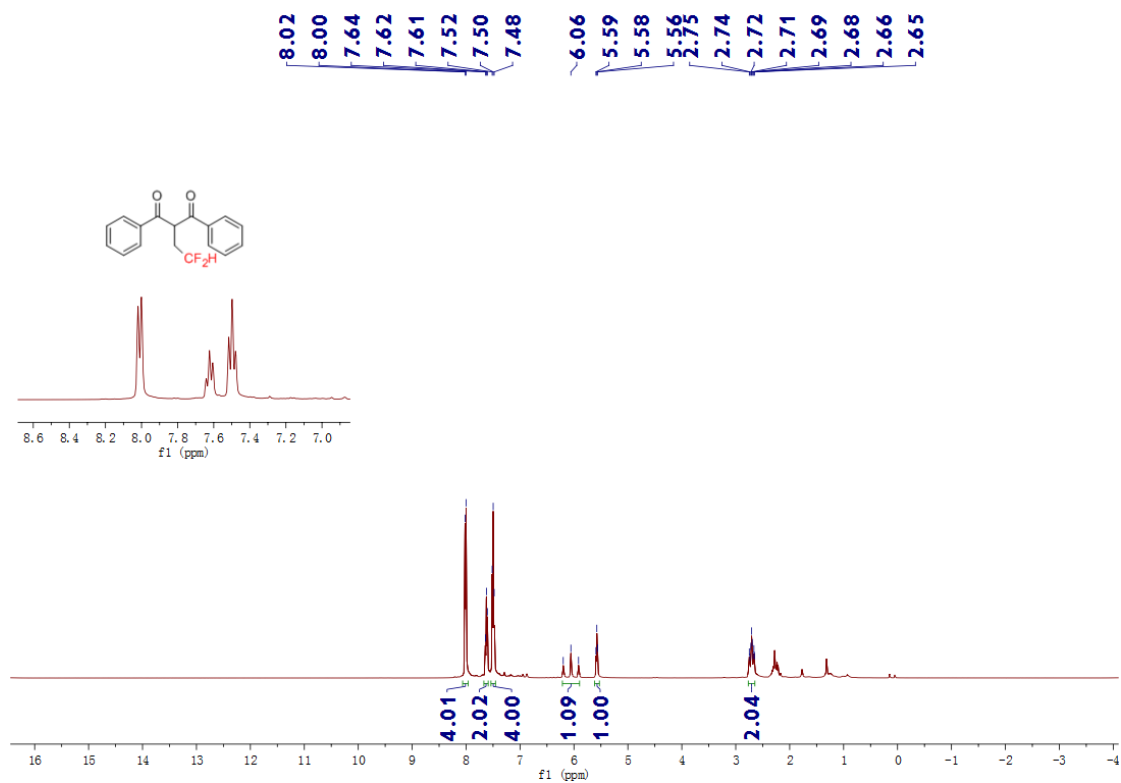

$^{13}\text{C}$ -NMR spectrum of **4a** in  $\text{CDCl}_3$

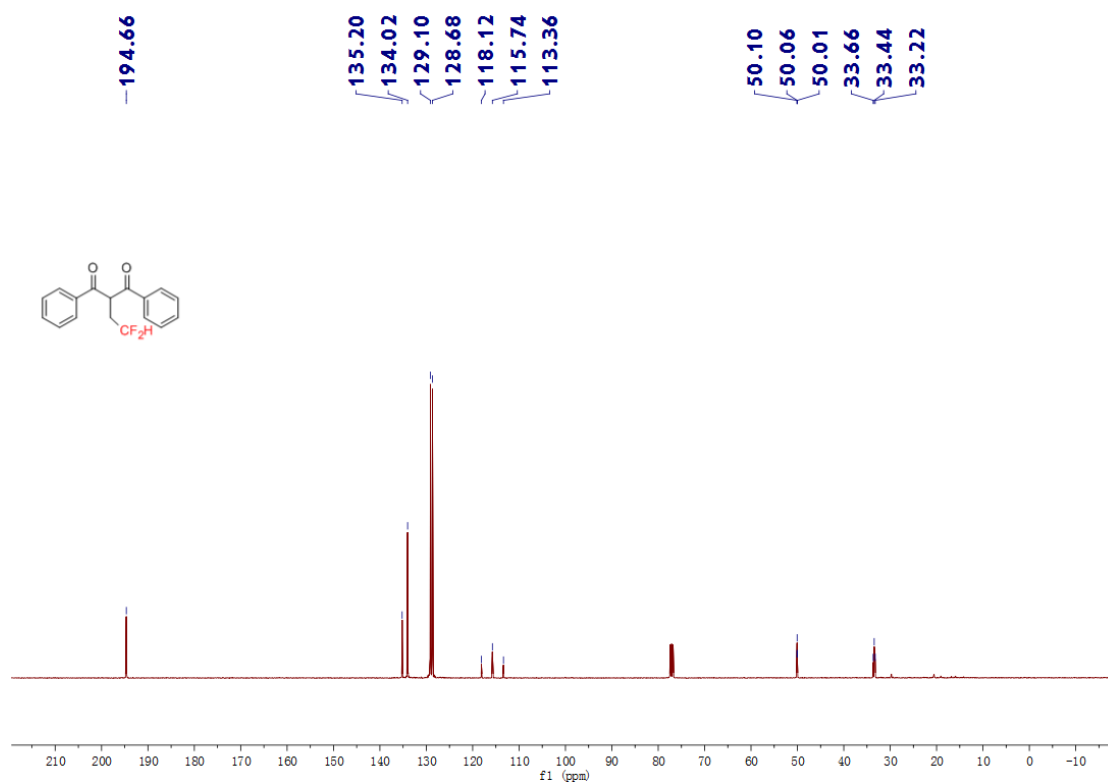

$^{19}\text{F}$ -NMR spectrum of **4a** in  $\text{CDCl}_3$

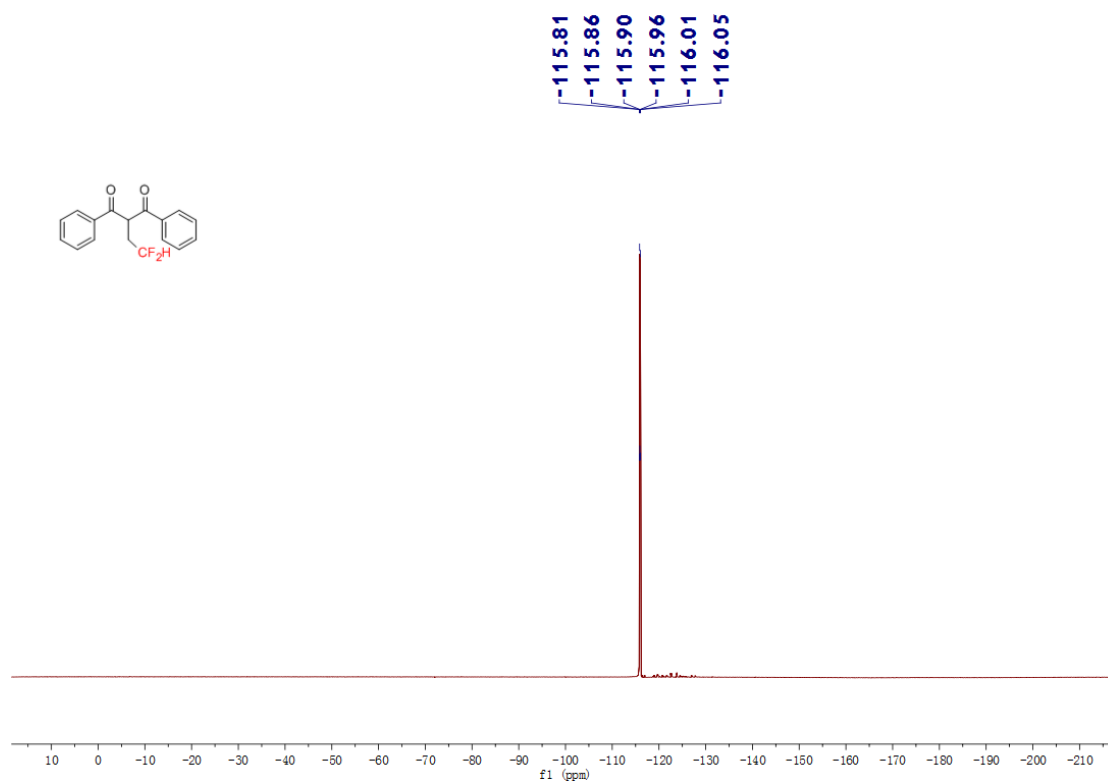



$^1\text{H}$ -NMR spectrum of **4b** in  $\text{CDCl}_3$

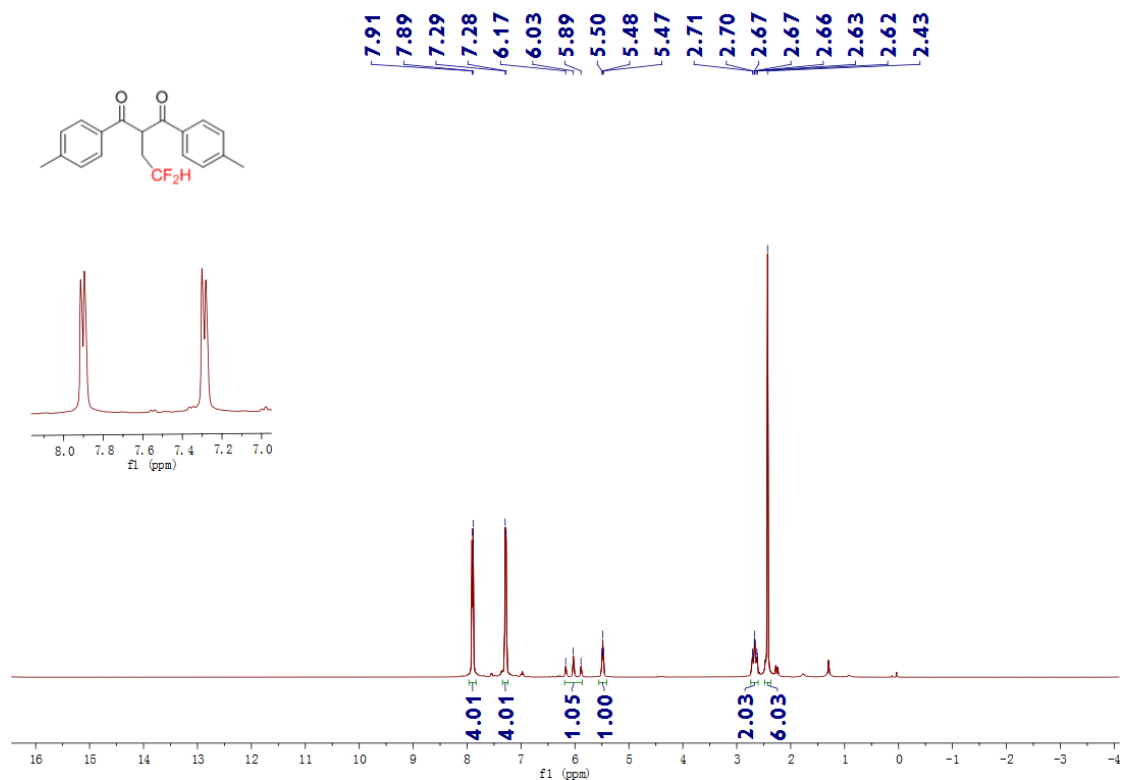

$^{13}\text{C}$ -NMR spectrum of **4b** in  $\text{CDCl}_3$

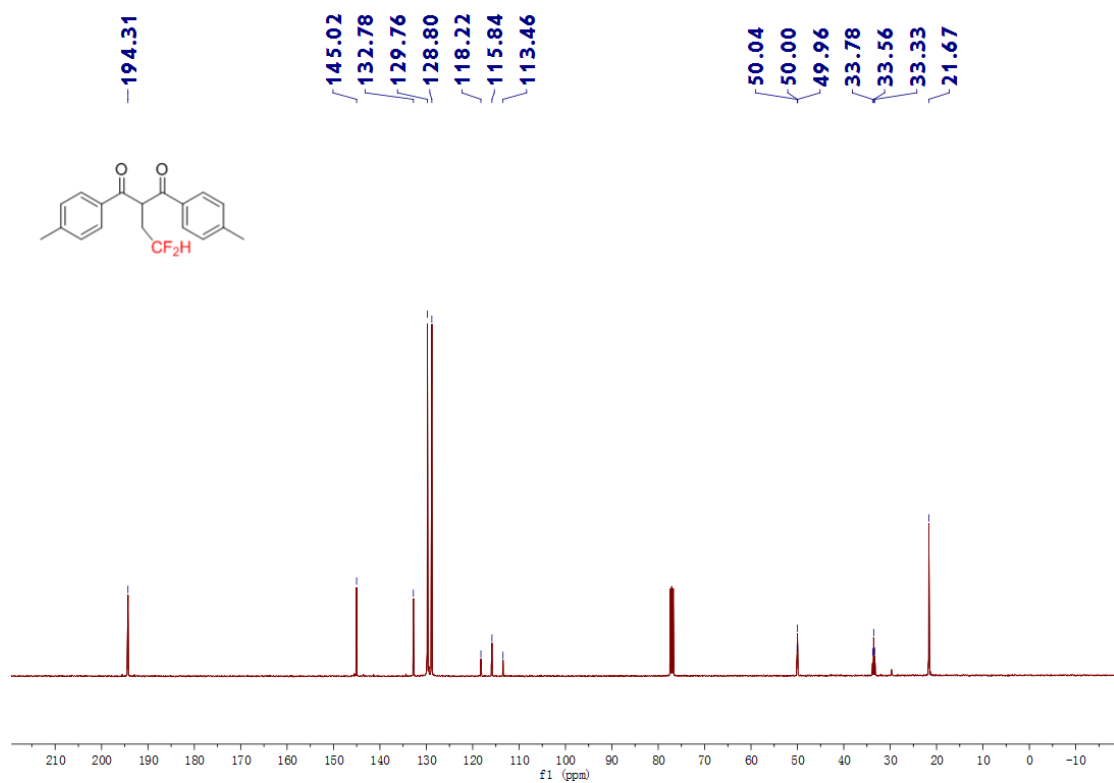

$^{19}\text{F}$ -NMR spectrum of **4b** in  $\text{CDCl}_3$

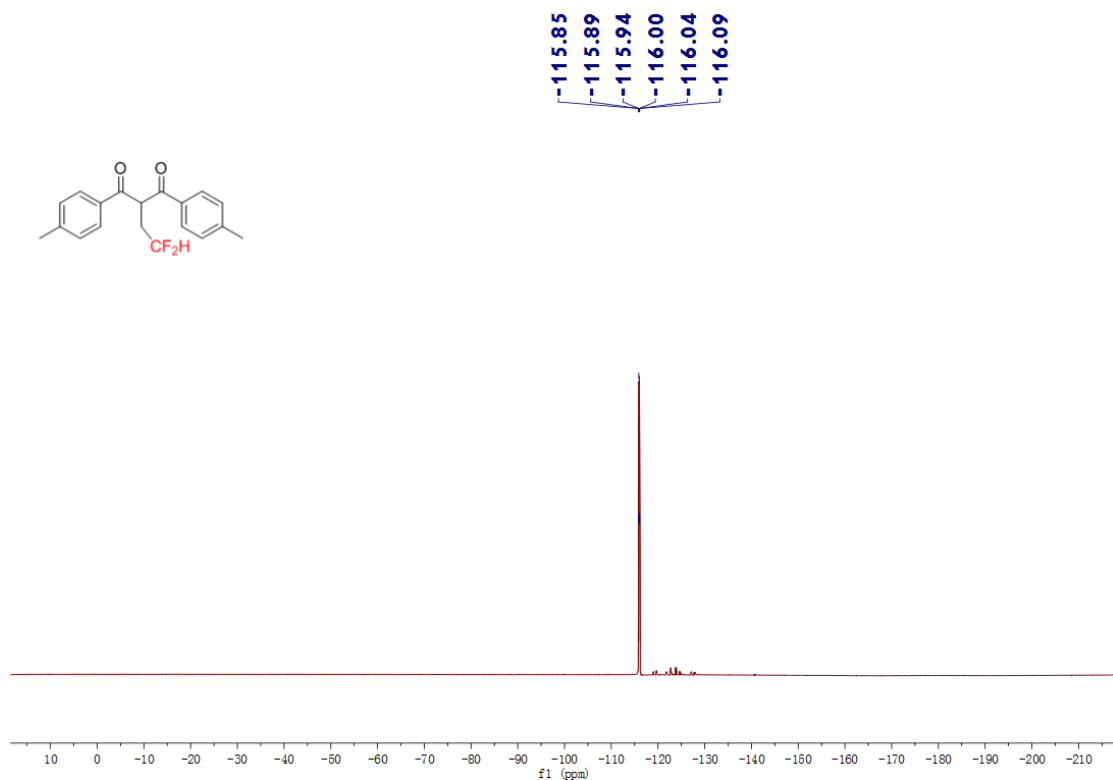

$^1\text{H}$ -NMR spectrum of **4e** in  $\text{CDCl}_3$

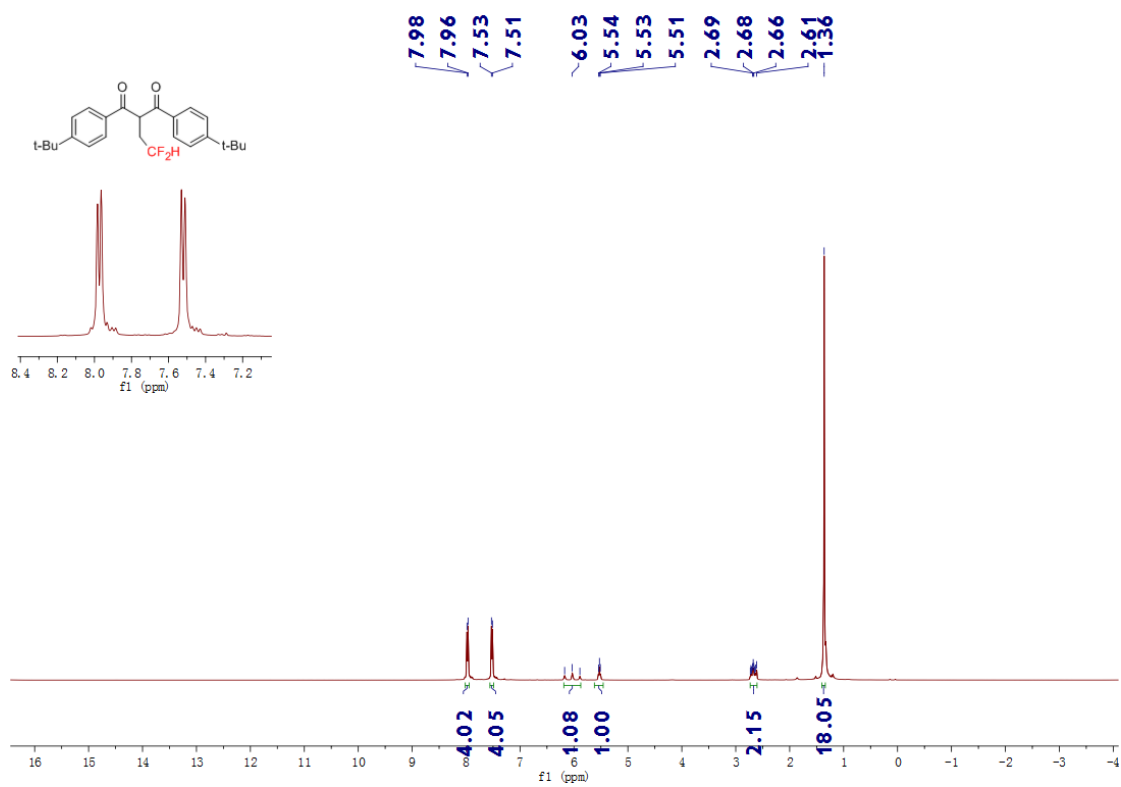

$^{13}\text{C}$ -NMR spectrum of **4e** in  $\text{CDCl}_3$

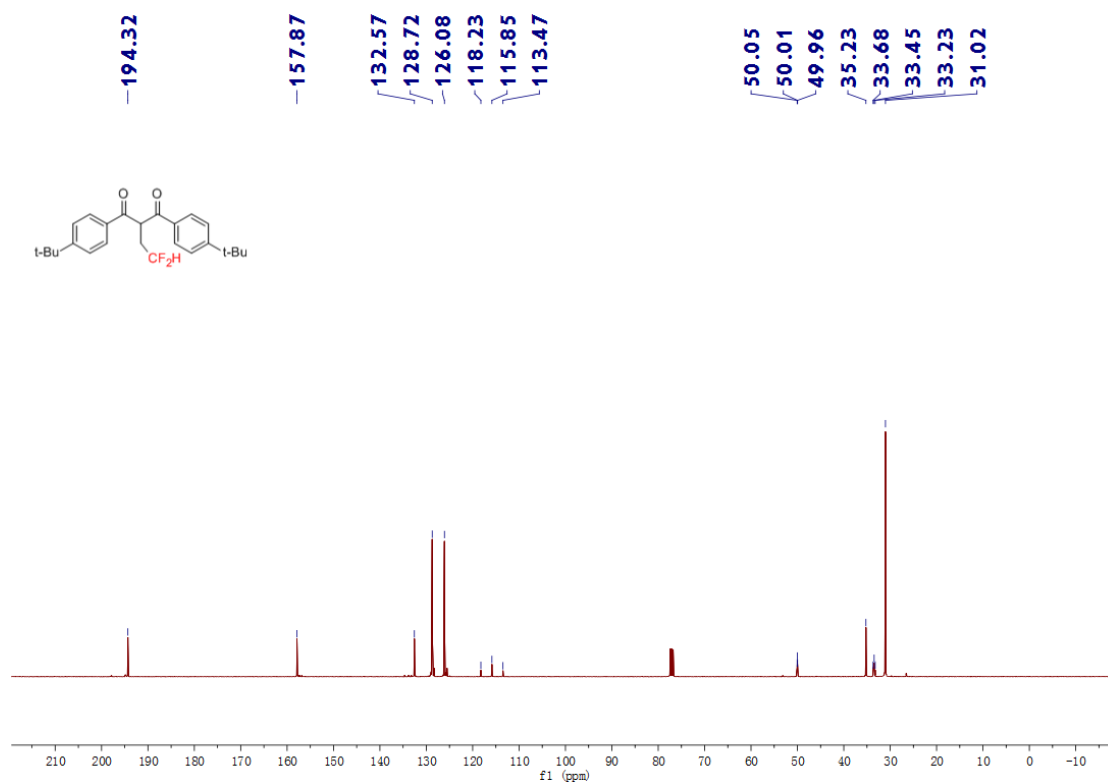

$^{19}\text{F}$ -NMR spectrum of **4e** in  $\text{CDCl}_3$

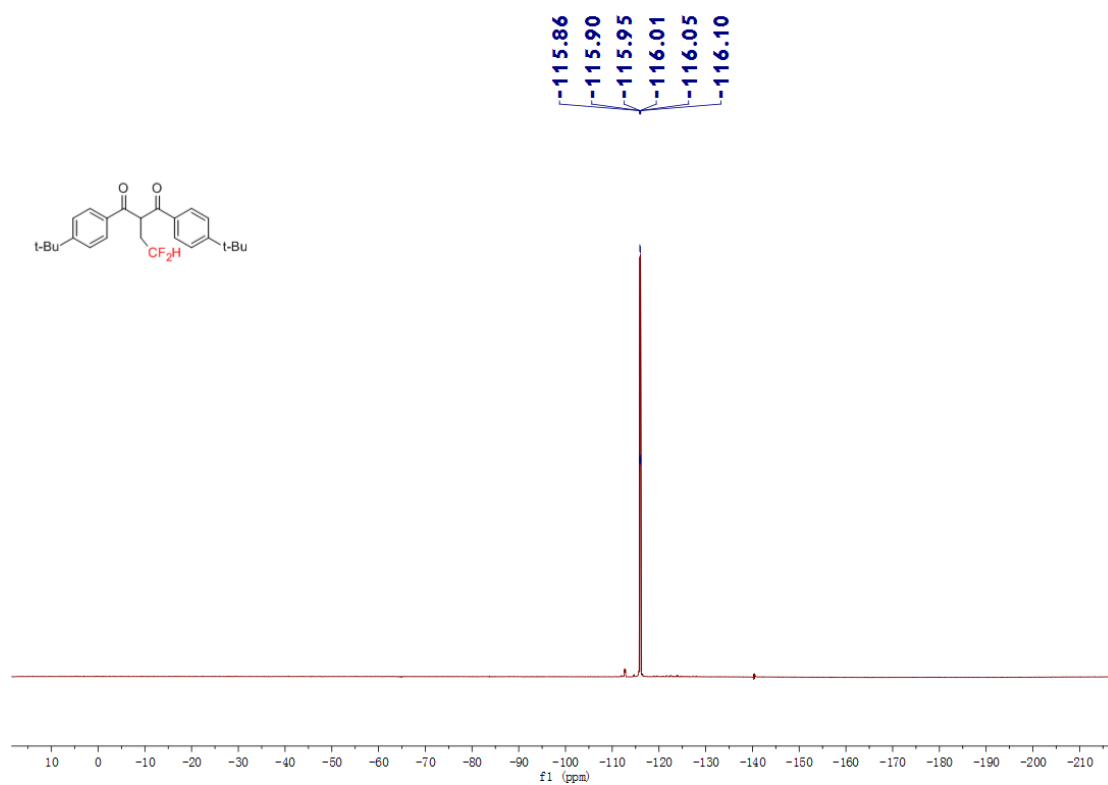

$^1\text{H}$ -NMR spectrum of **4i** in  $\text{CDCl}_3$

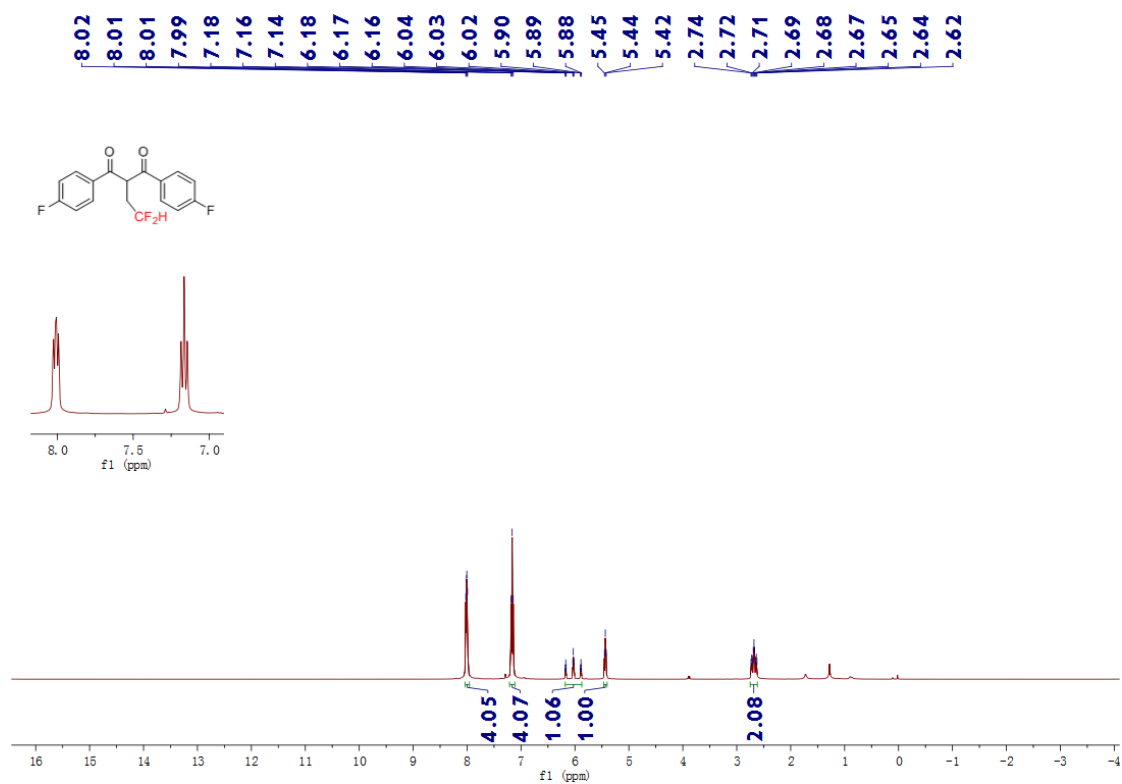

$^{13}\text{C}$ -NMR spectrum of **4i** in  $\text{CDCl}_3$

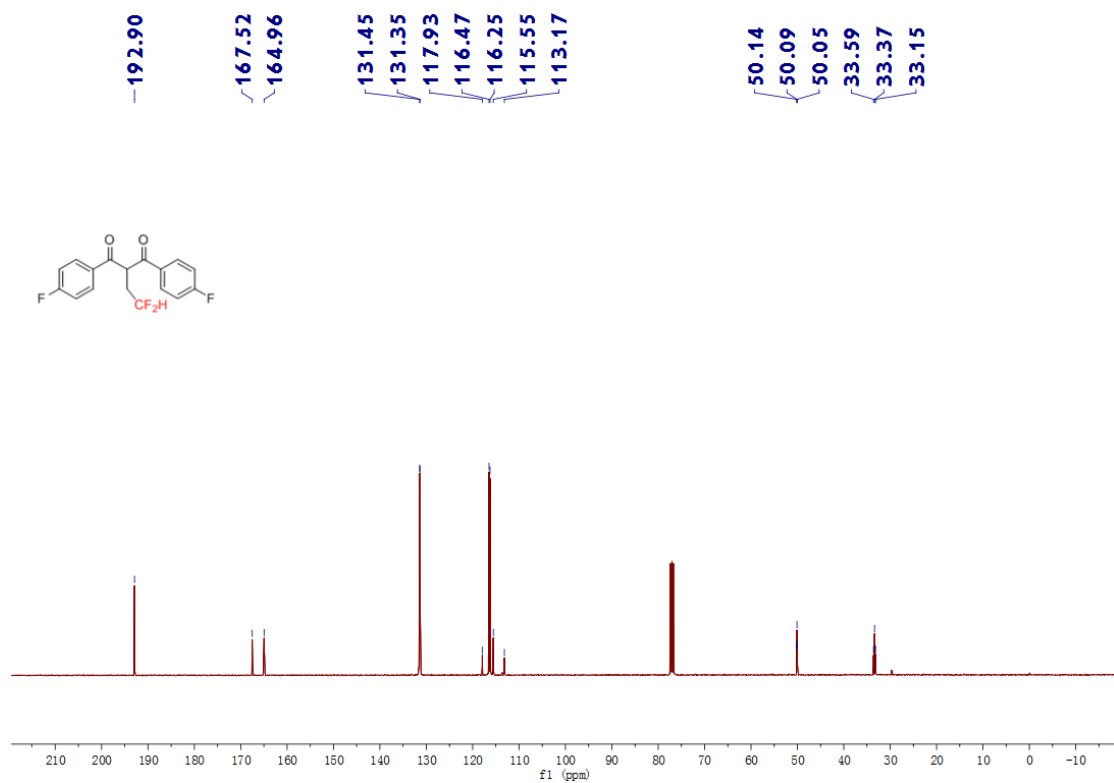

$^{19}\text{F}$ -NMR spectrum of **4i** in  $\text{CDCl}_3$

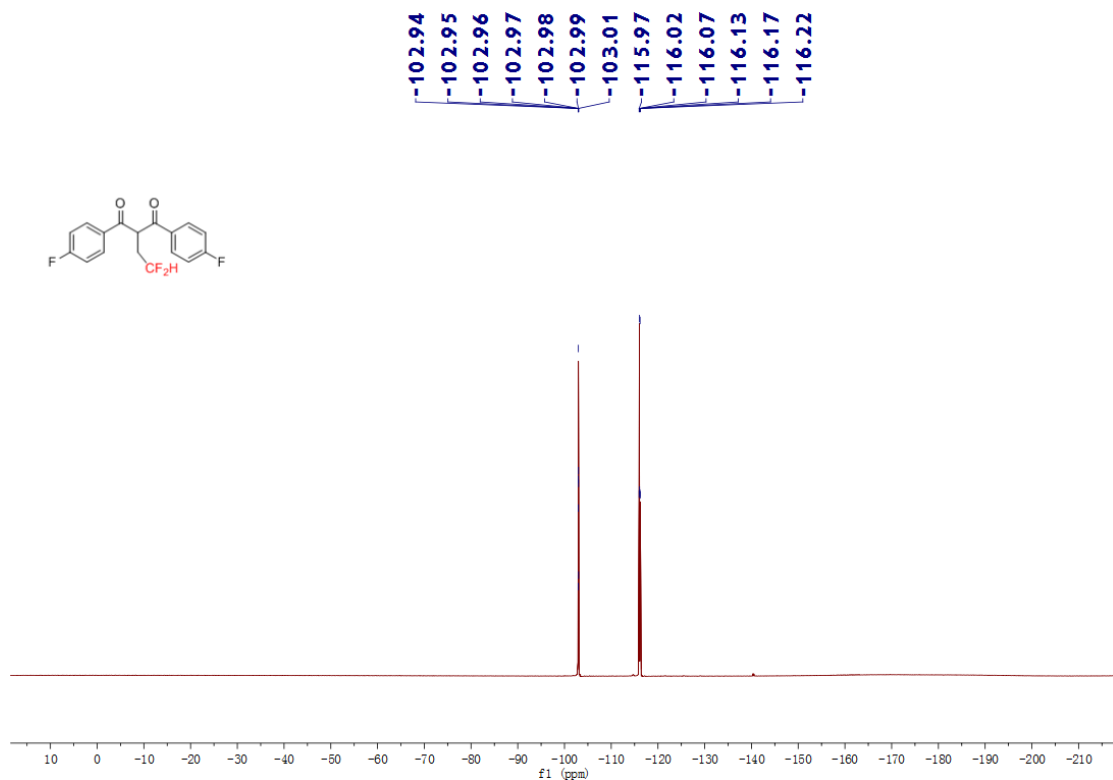

$^1\text{H}$ -NMR spectrum of **4j** in  $\text{CDCl}_3$

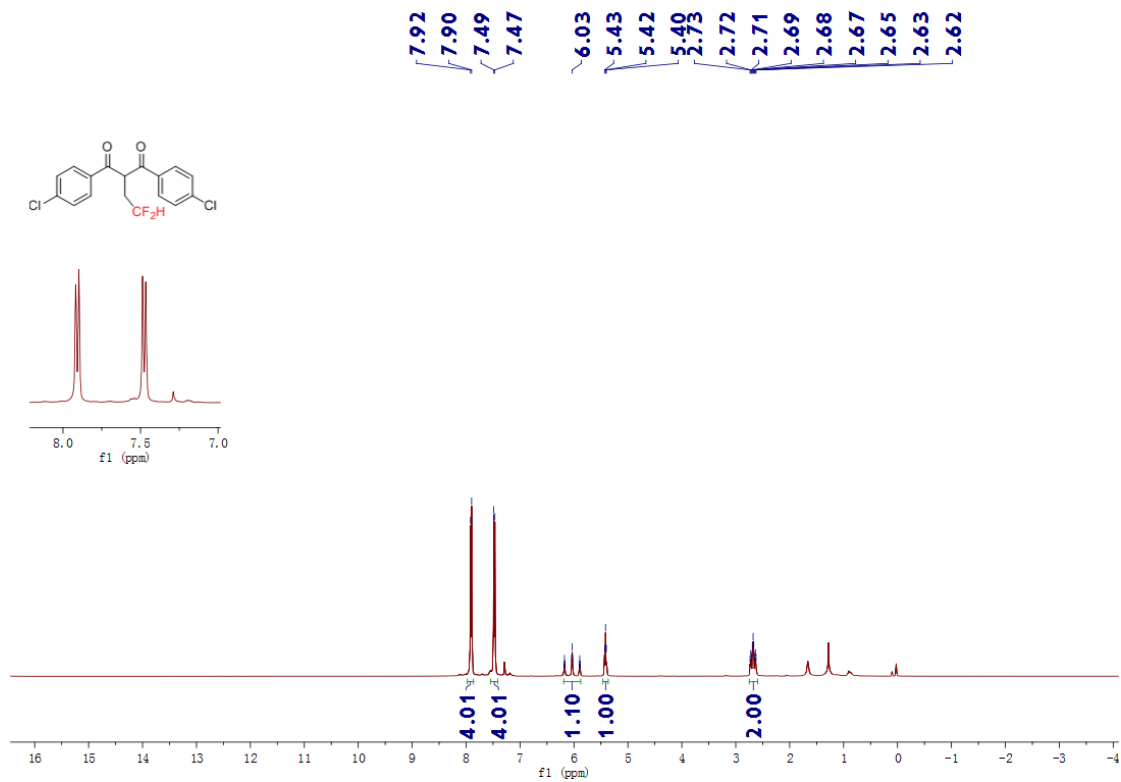

$^{13}\text{C}$ -NMR spectrum of **4j** in  $\text{CDCl}_3$

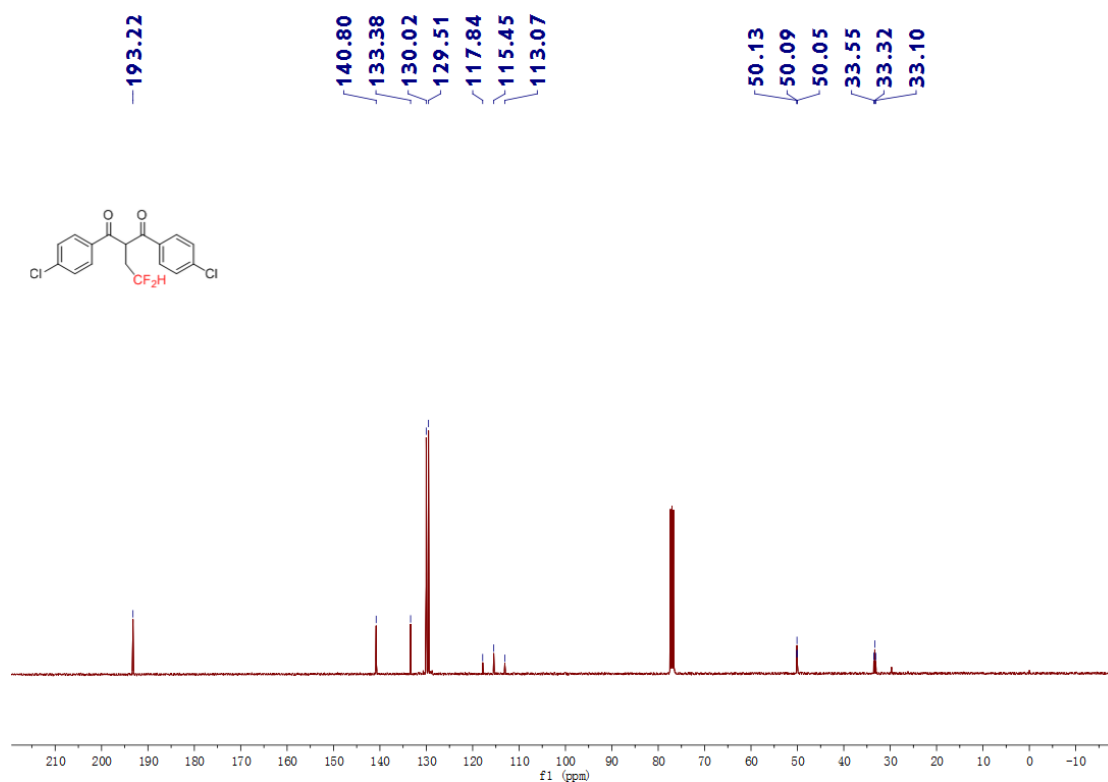

$^{19}\text{F}$ -NMR spectrum of **4j** in  $\text{CDCl}_3$

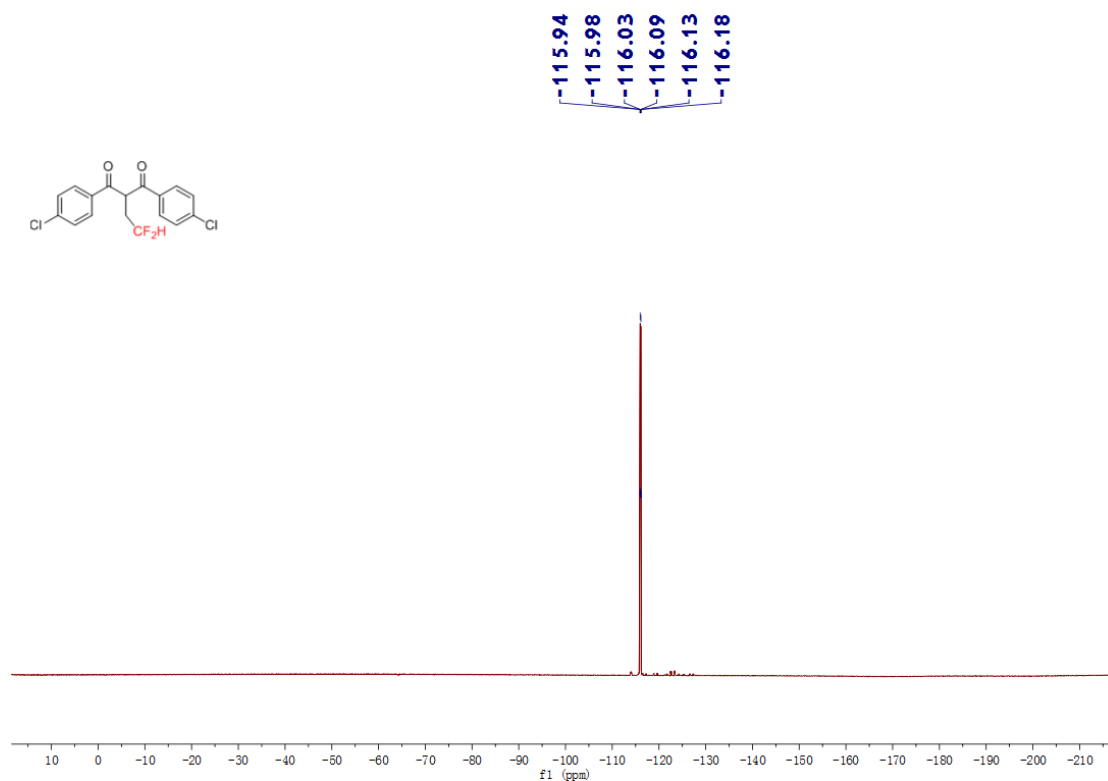

$^1\text{H}$ -NMR spectrum of **4k** in  $\text{CDCl}_3$

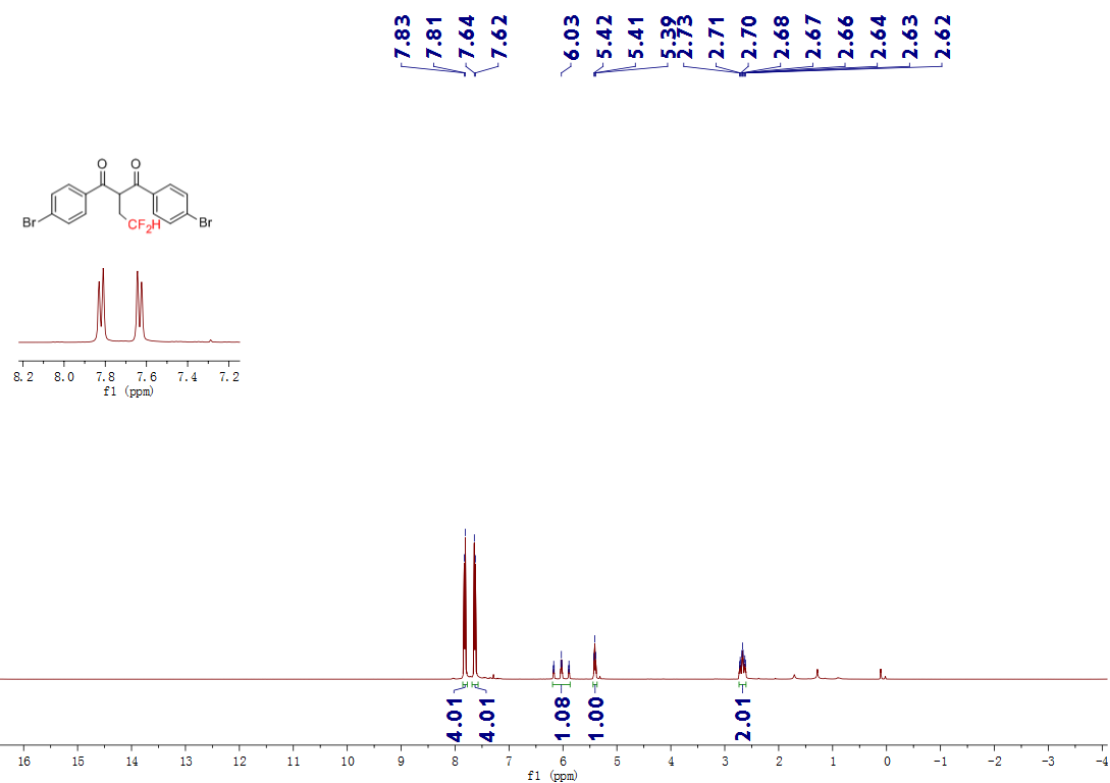

$^{13}\text{C}$ -NMR spectrum of **4k** in  $\text{CDCl}_3$

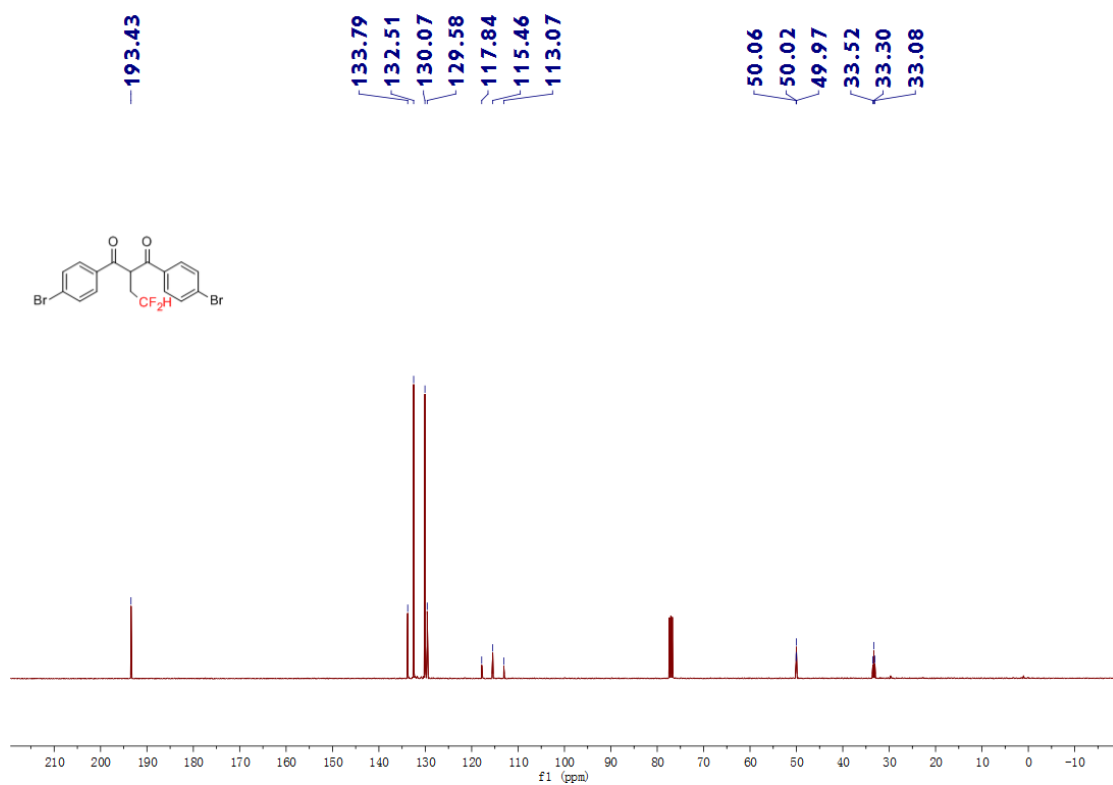

$^{19}\text{F}$ -NMR spectrum of **4k** in  $\text{CDCl}_3$

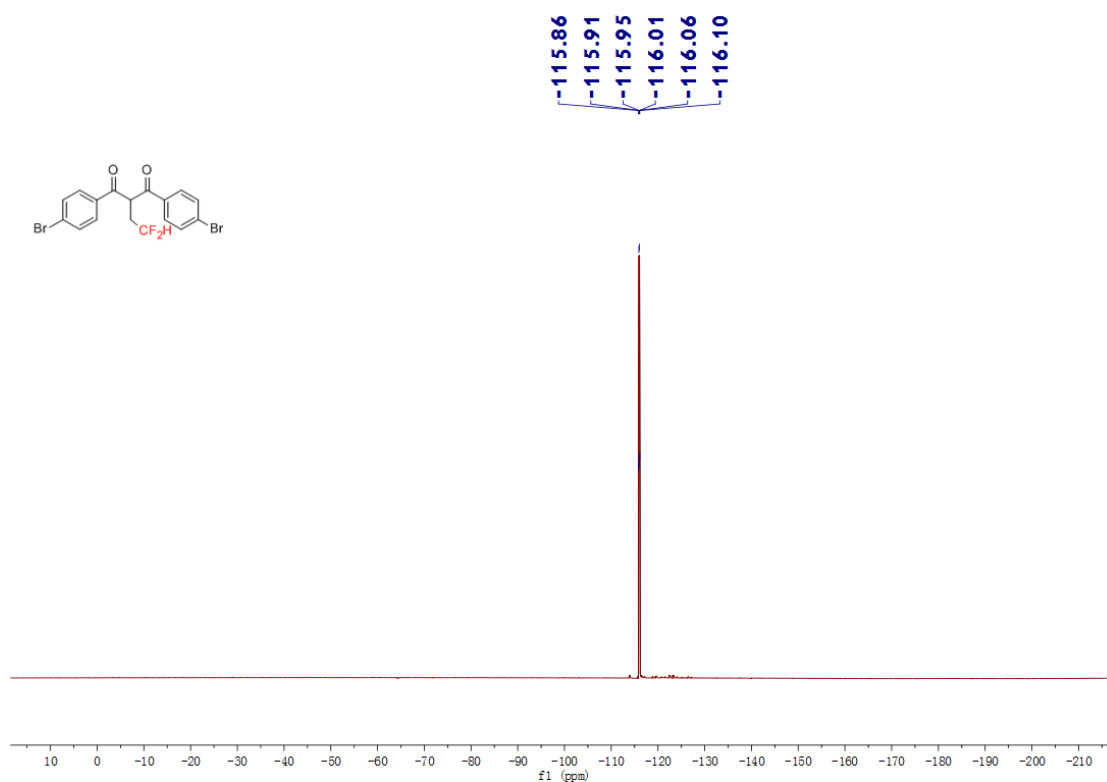

$^1\text{H}$ -NMR spectrum of **4q** in  $\text{CDCl}_3$

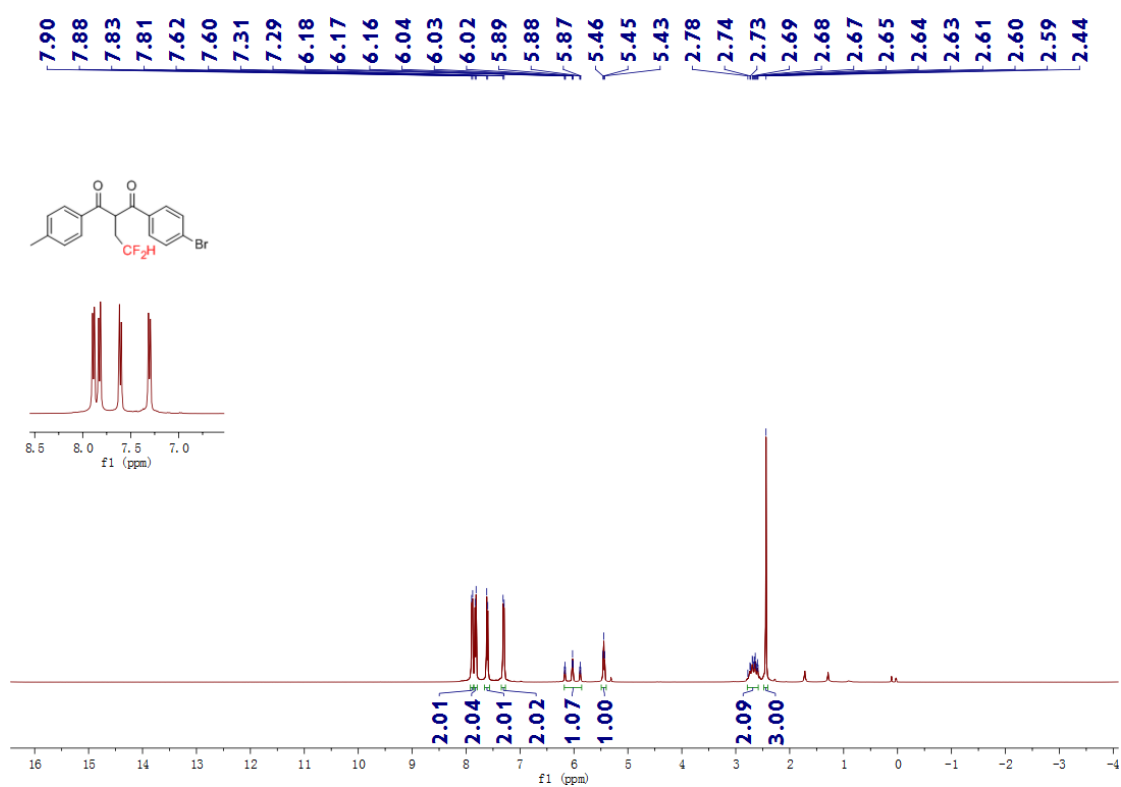



$^{13}\text{C}$ -NMR spectrum of **4q** in  $\text{CDCl}_3$

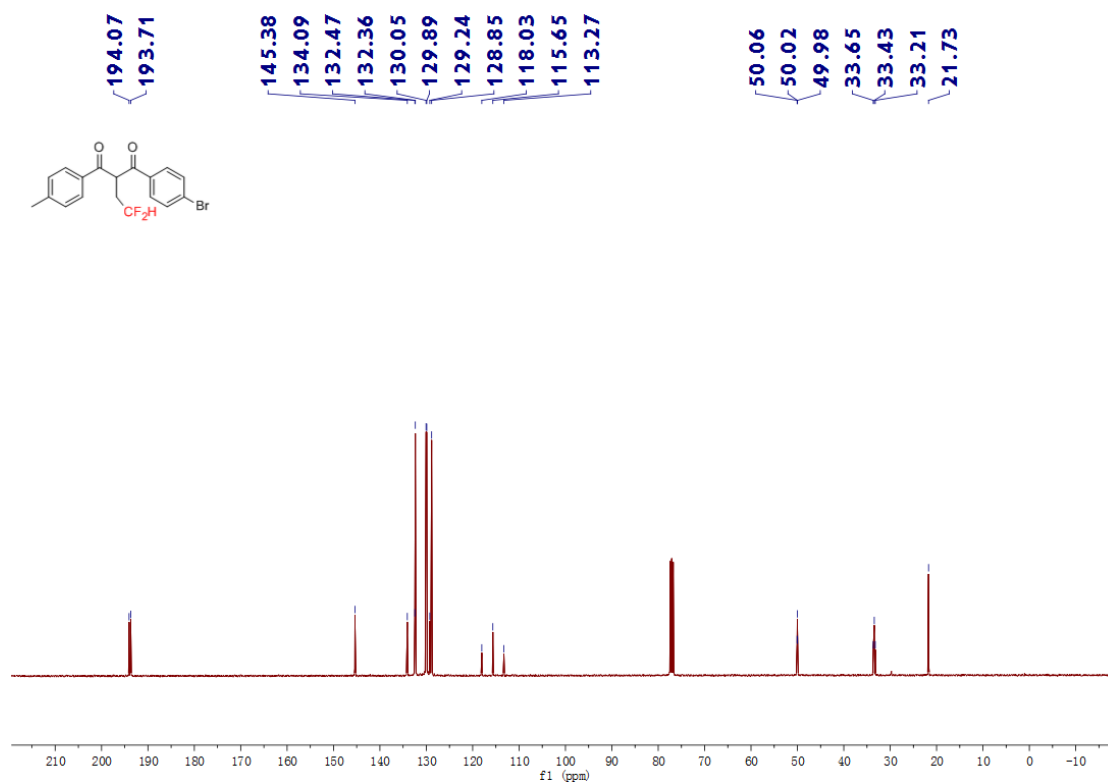

$^{19}\text{F}$ -NMR spectrum of **4q** in  $\text{CDCl}_3$

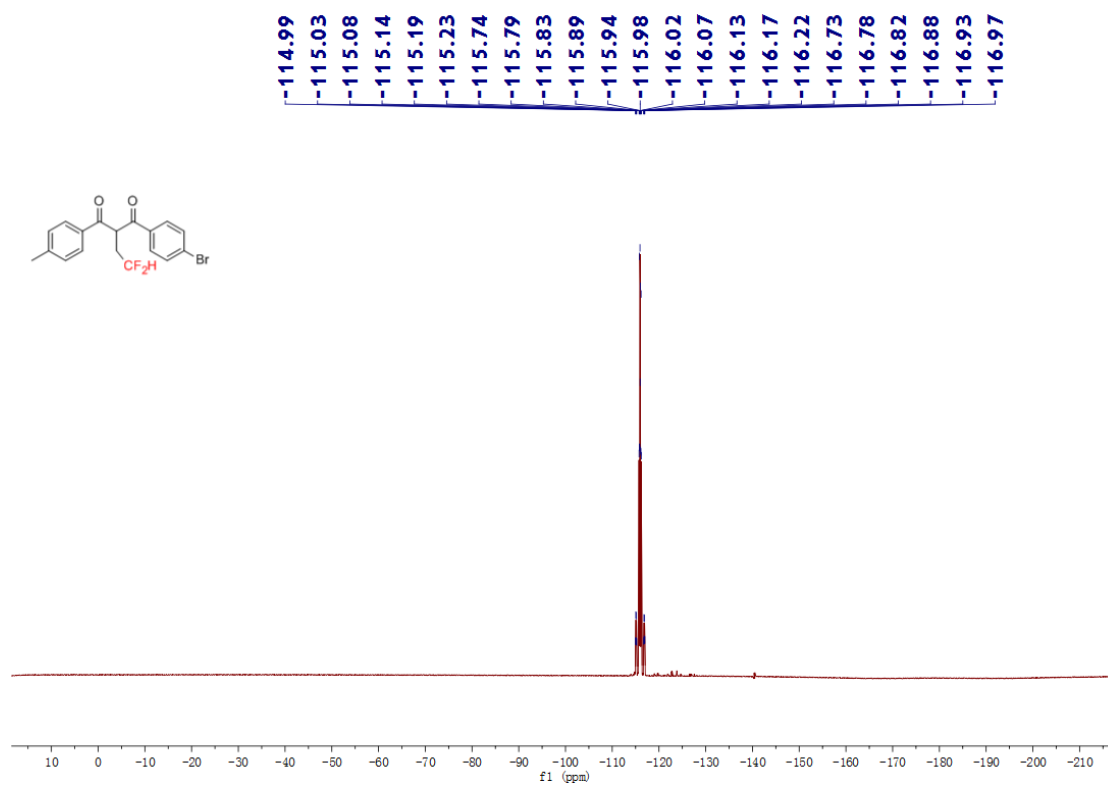

$^1\text{H}$ -NMR spectrum of **4s** in  $\text{CDCl}_3$

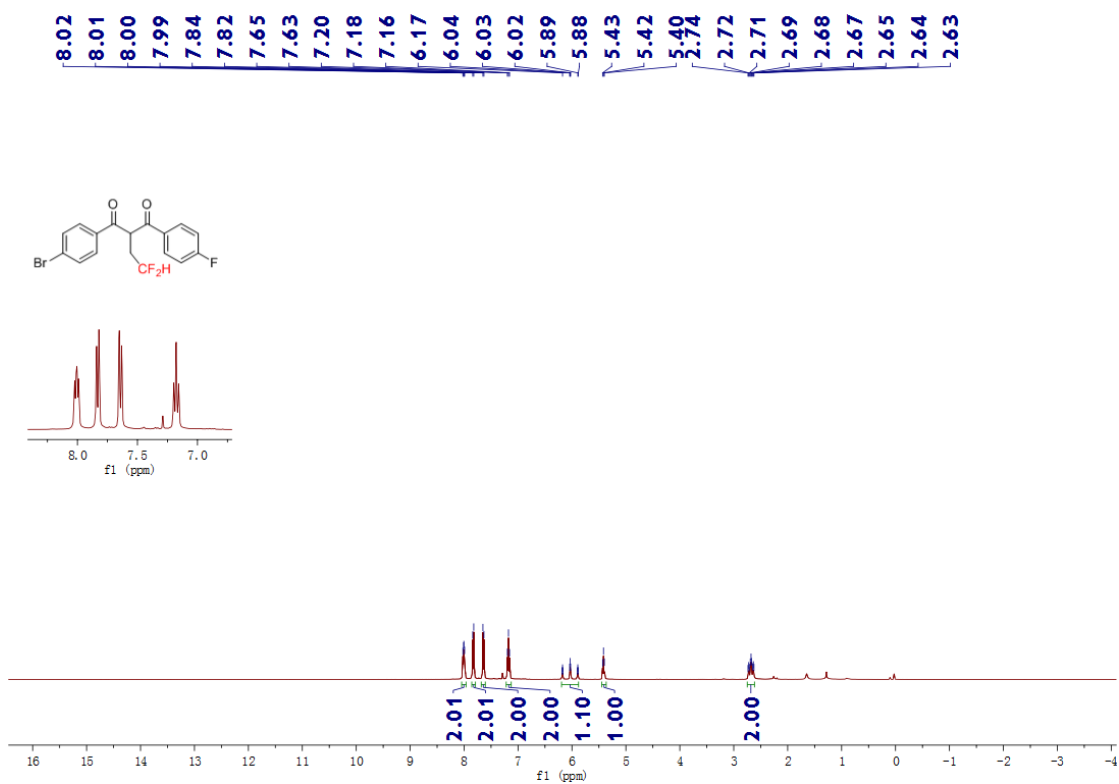

$^{13}\text{C}$ -NMR spectrum of **4s** in  $\text{CDCl}_3$

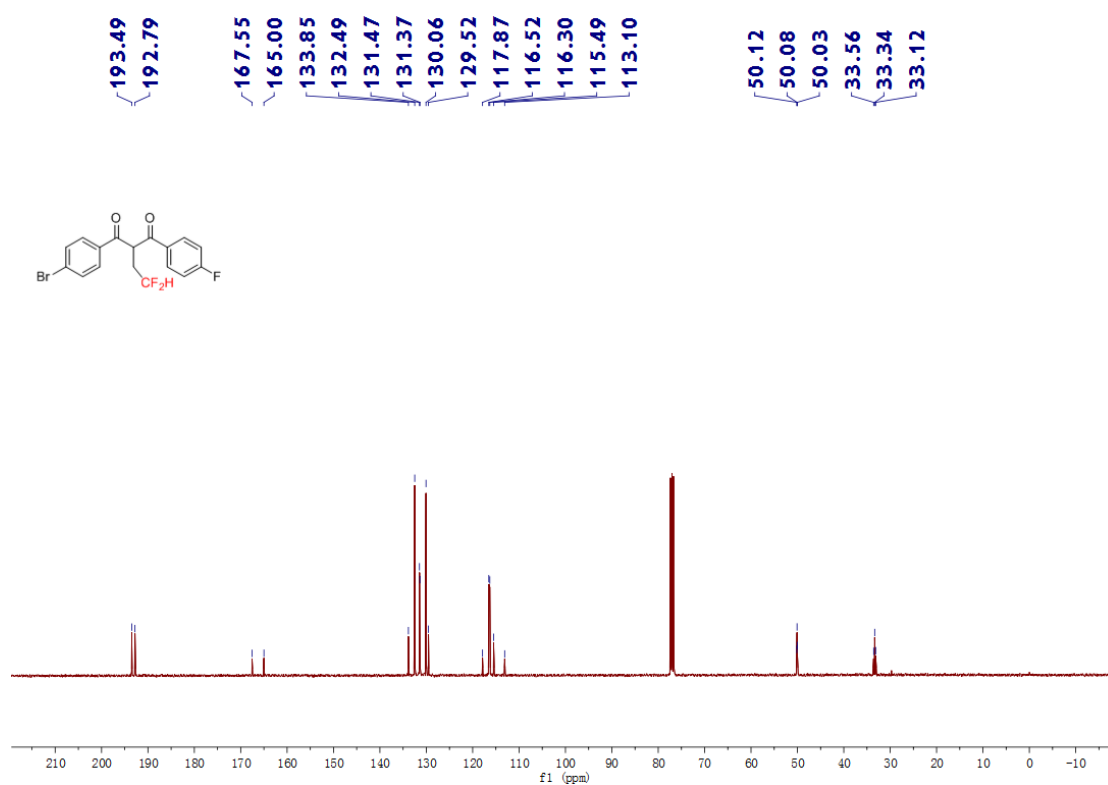

$^{19}\text{F}$ -NMR spectrum of **4s** in  $\text{CDCl}_3$

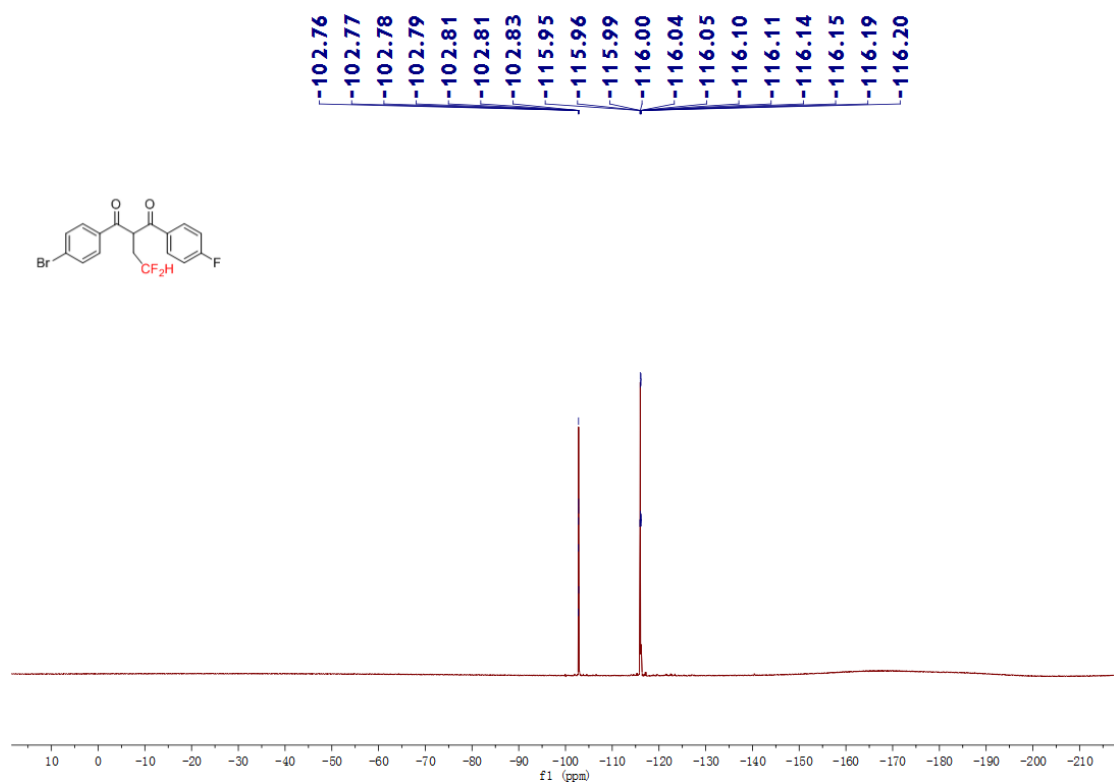

$^1\text{H}$ -NMR spectrum of **4t** in  $\text{CDCl}_3$

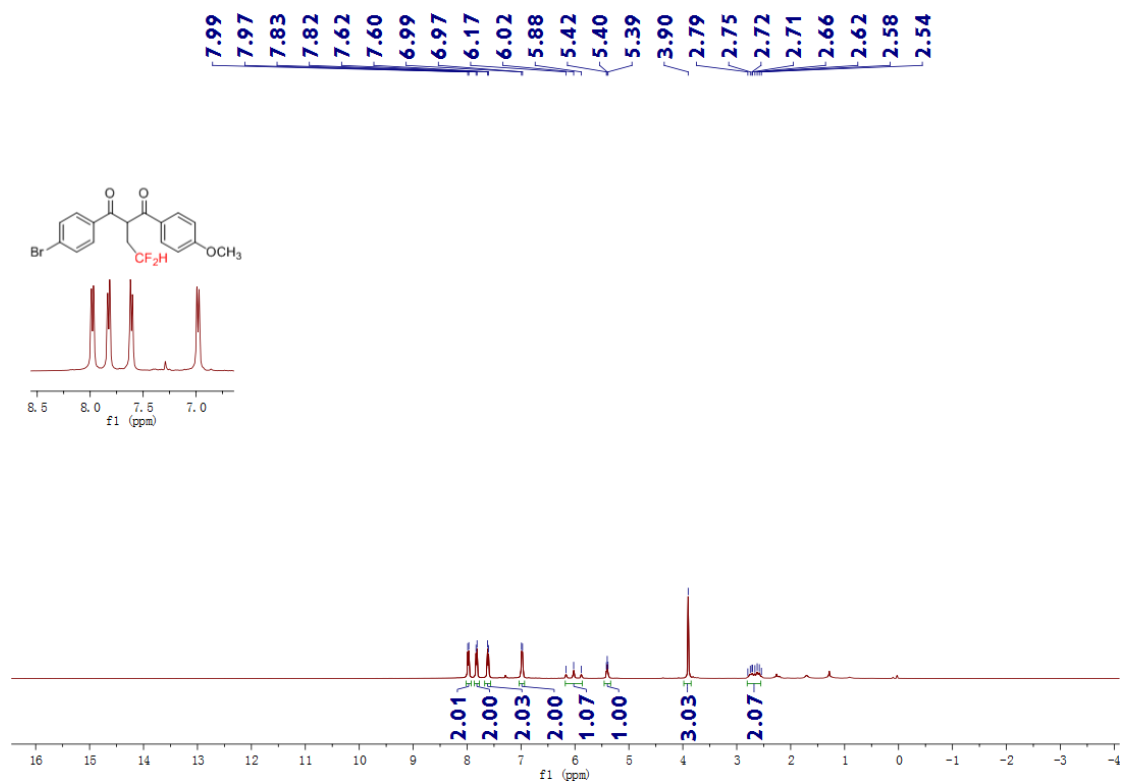

$^{13}\text{C}$ -NMR spectrum of **4t** in  $\text{CDCl}_3$

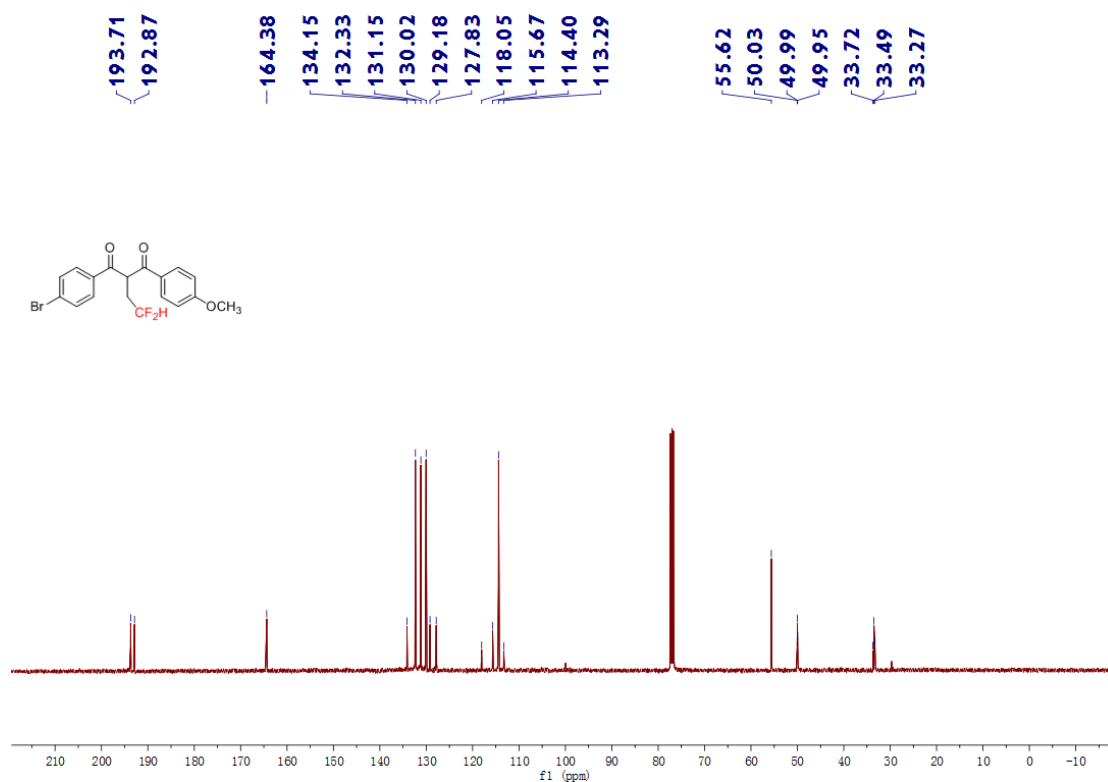

$^{19}\text{F}$ -NMR spectrum of **4t** in  $\text{CDCl}_3$

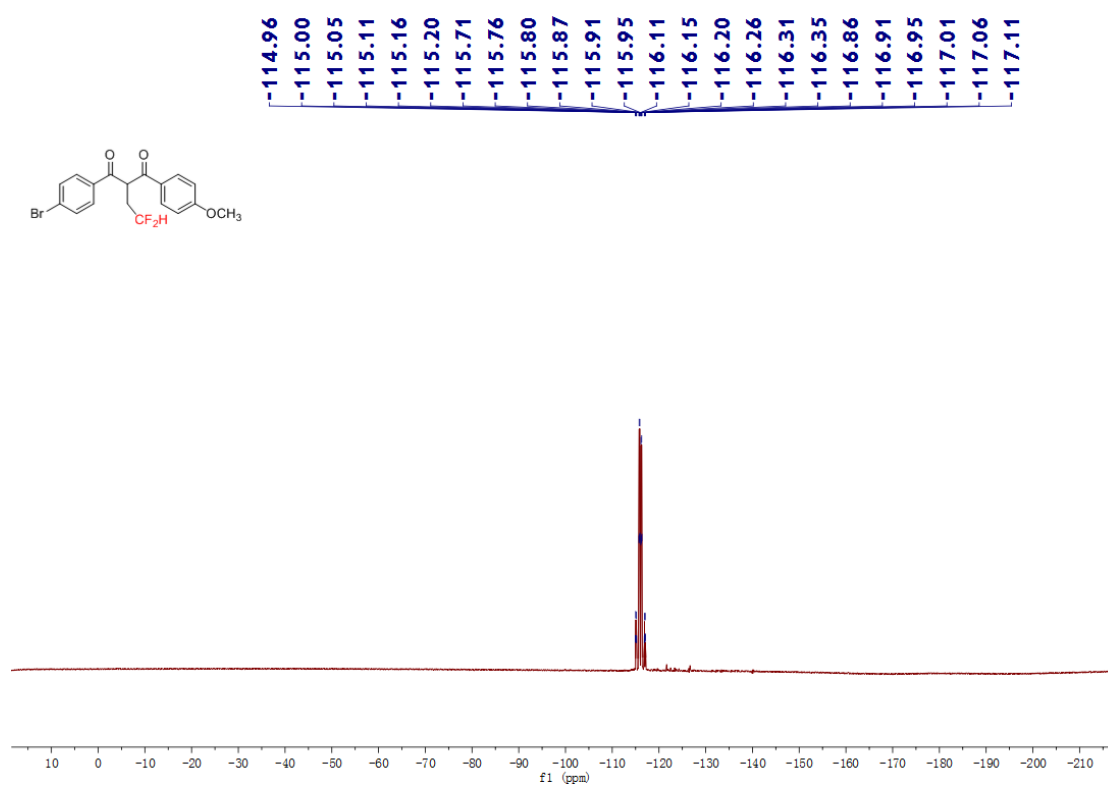

$^1\text{H}$ -NMR spectrum of **4y** in  $\text{CDCl}_3$

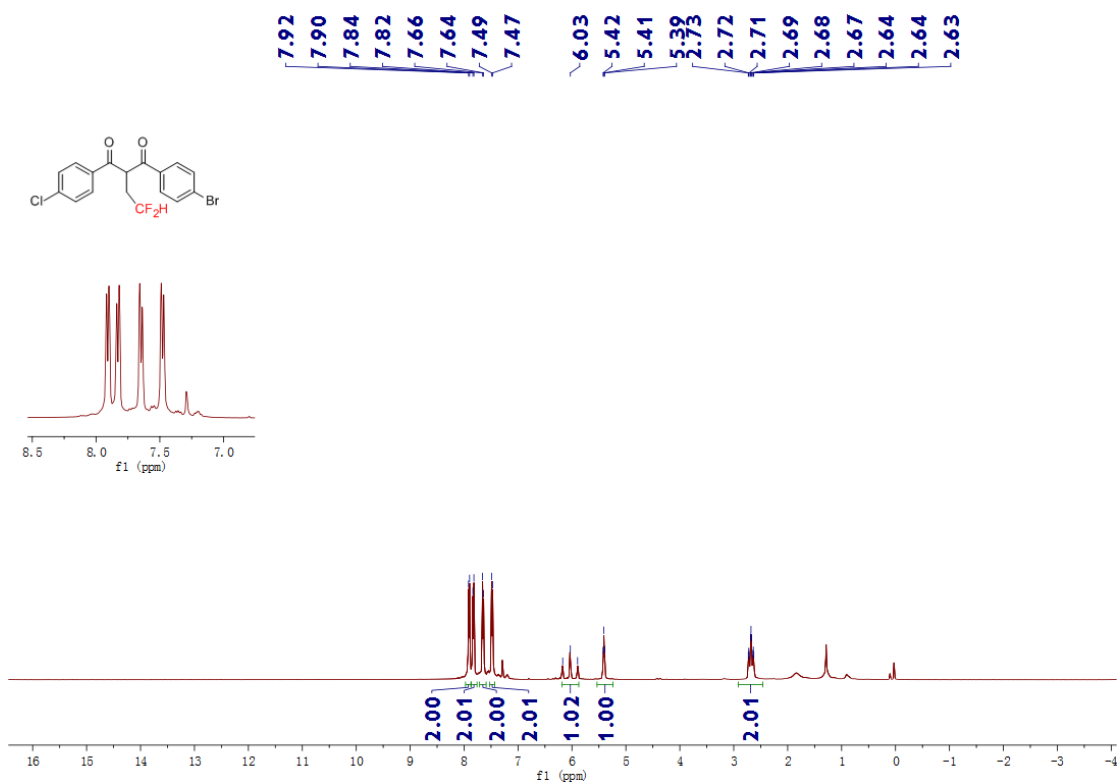

$^{13}\text{C}$ -NMR spectrum of **4y** in  $\text{CDCl}_3$

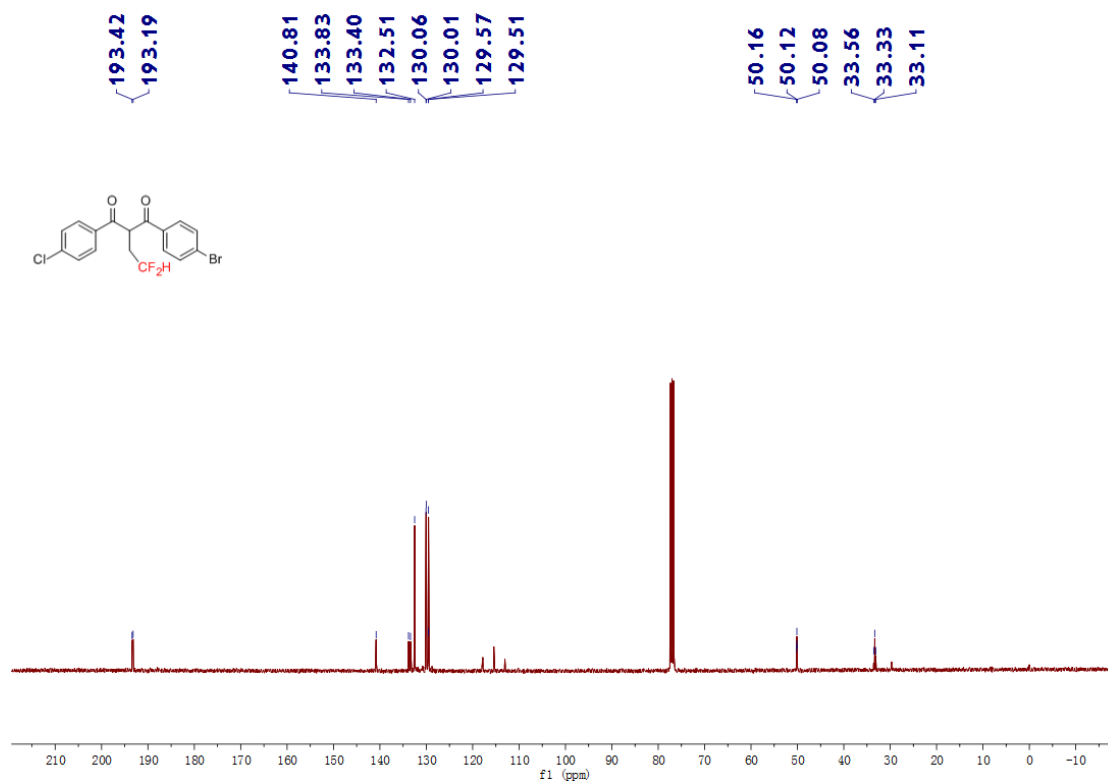

$^{19}\text{F}$ -NMR spectrum of **4y** in  $\text{CDCl}_3$

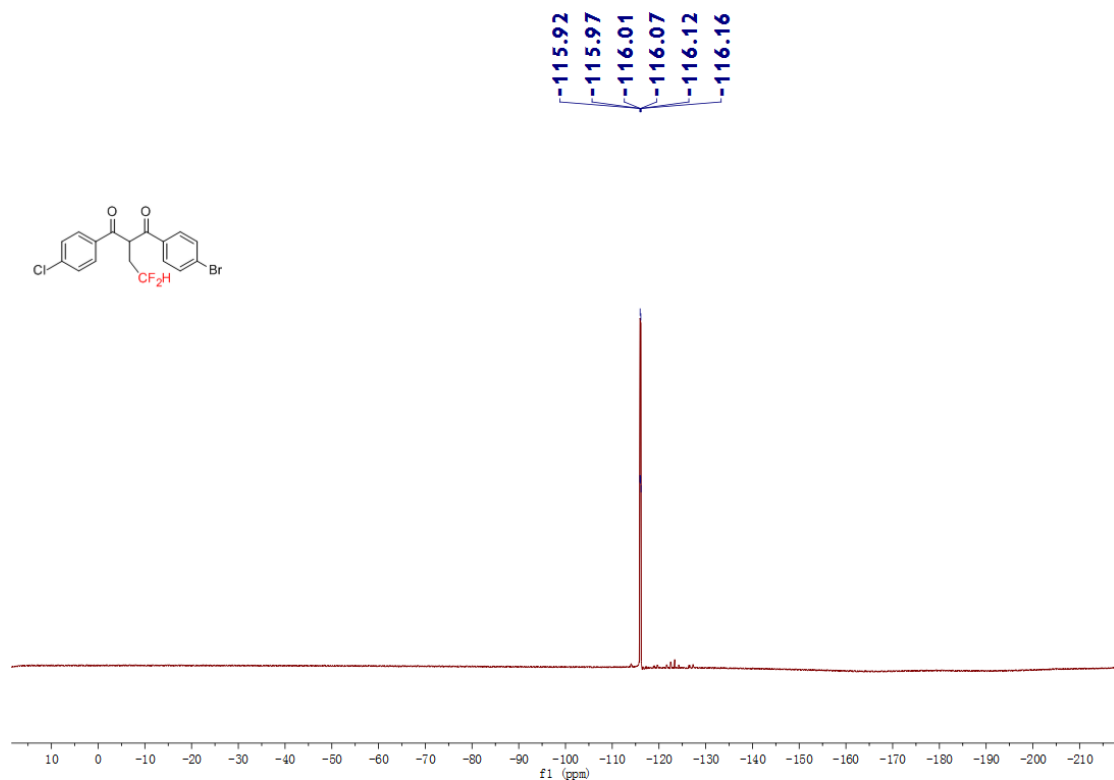

$^1\text{H}$ -NMR spectrum of **4x** in  $\text{CDCl}_3$

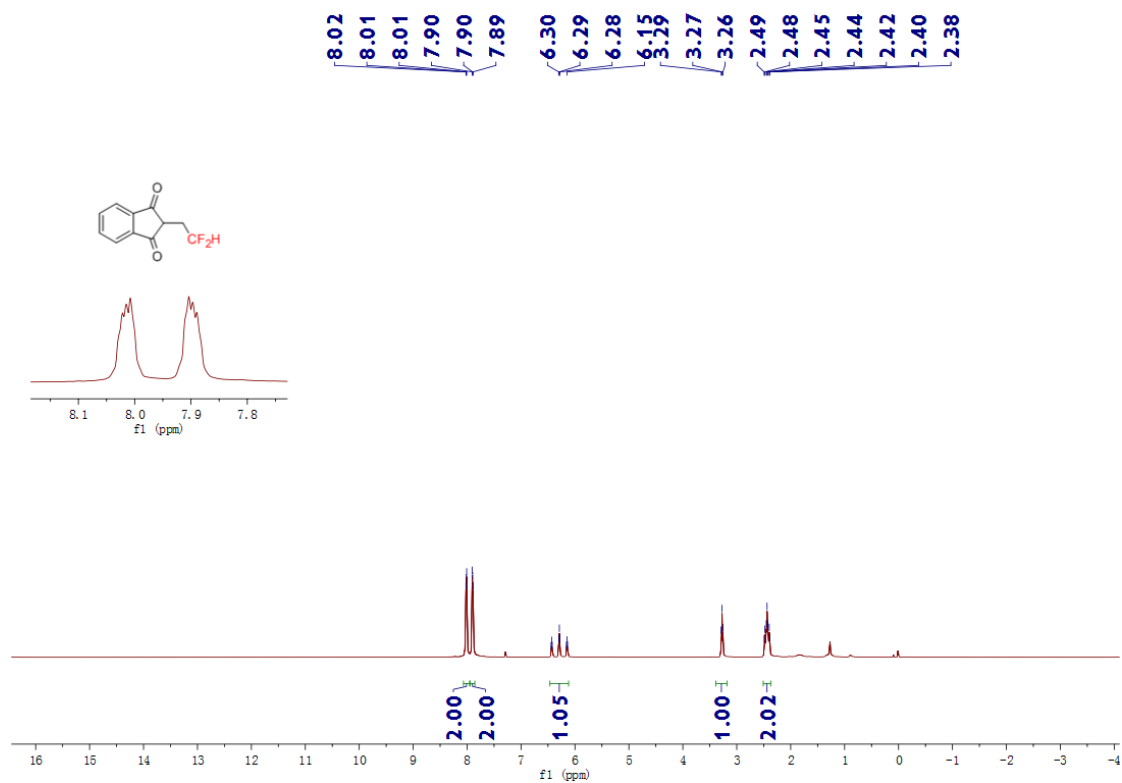

$^{13}\text{C}$ -NMR spectrum of **4x** in  $\text{CDCl}_3$

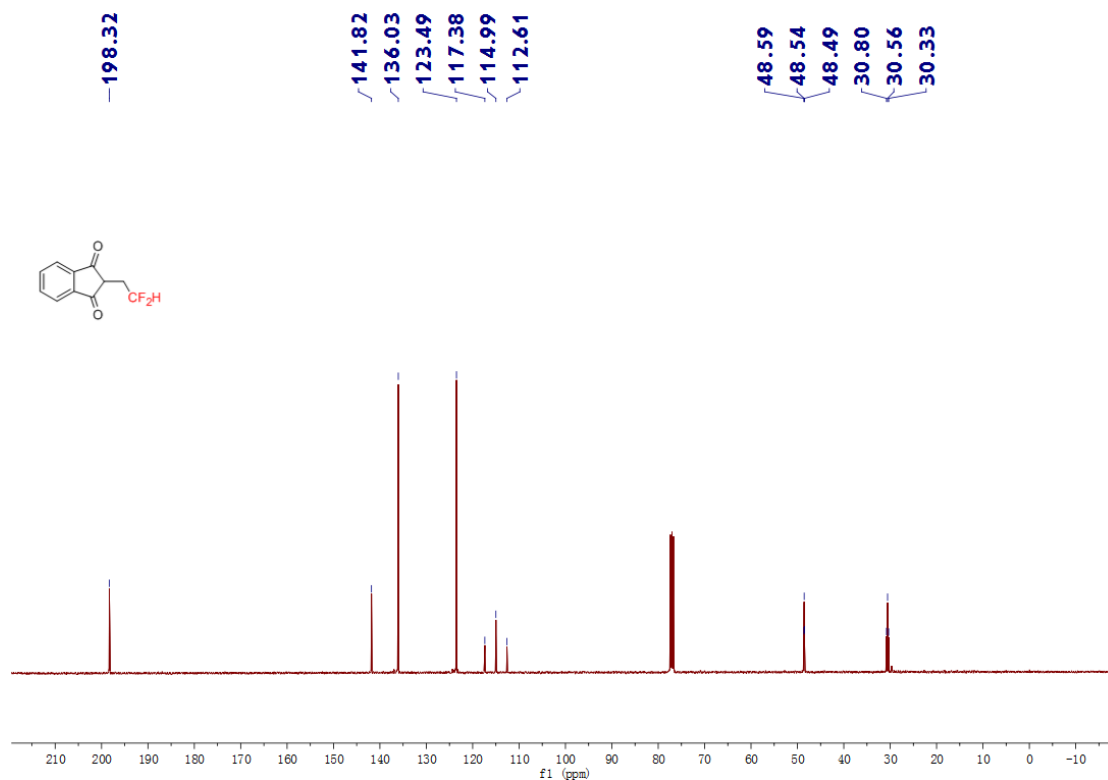

$^{19}\text{F}$ -NMR spectrum of **4x** in  $\text{CDCl}_3$

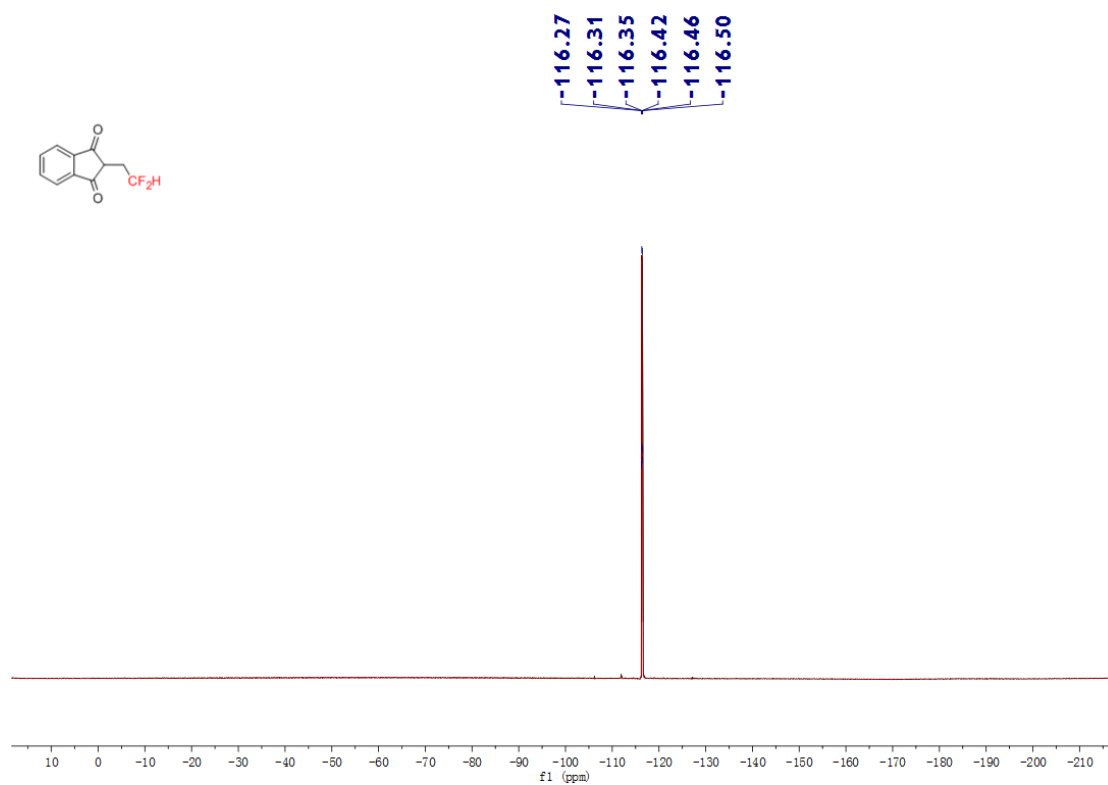

$^1\text{H}$ -NMR spectrum of **5** in  $\text{CDCl}_3$

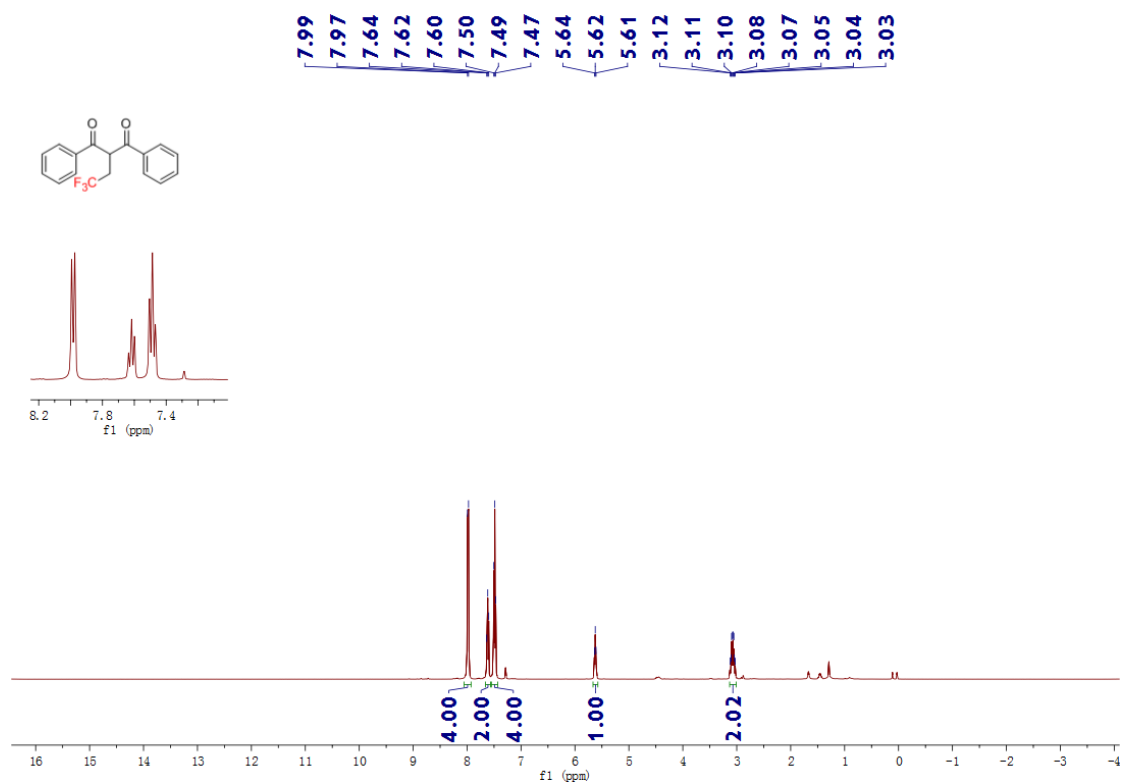

$^{13}\text{C}$ -NMR spectrum of **5** in  $\text{CDCl}_3$

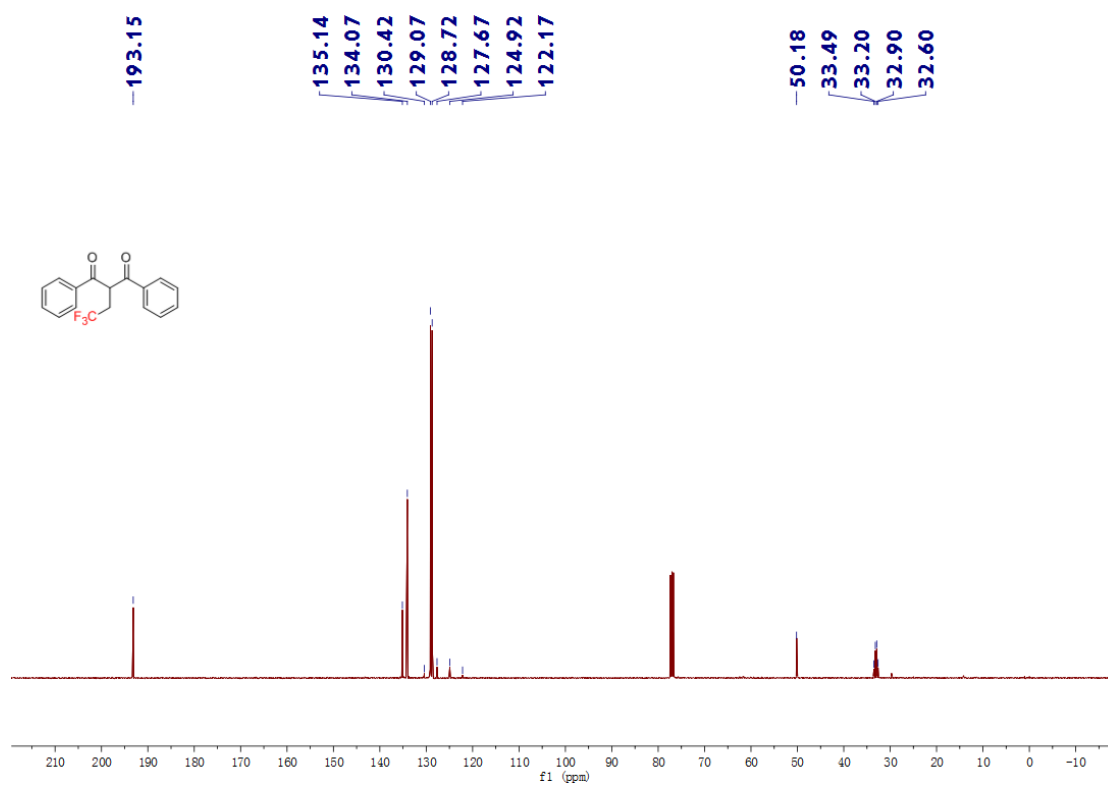



$^{19}\text{F}$ -NMR spectrum of **5** in  $\text{CDCl}_3$

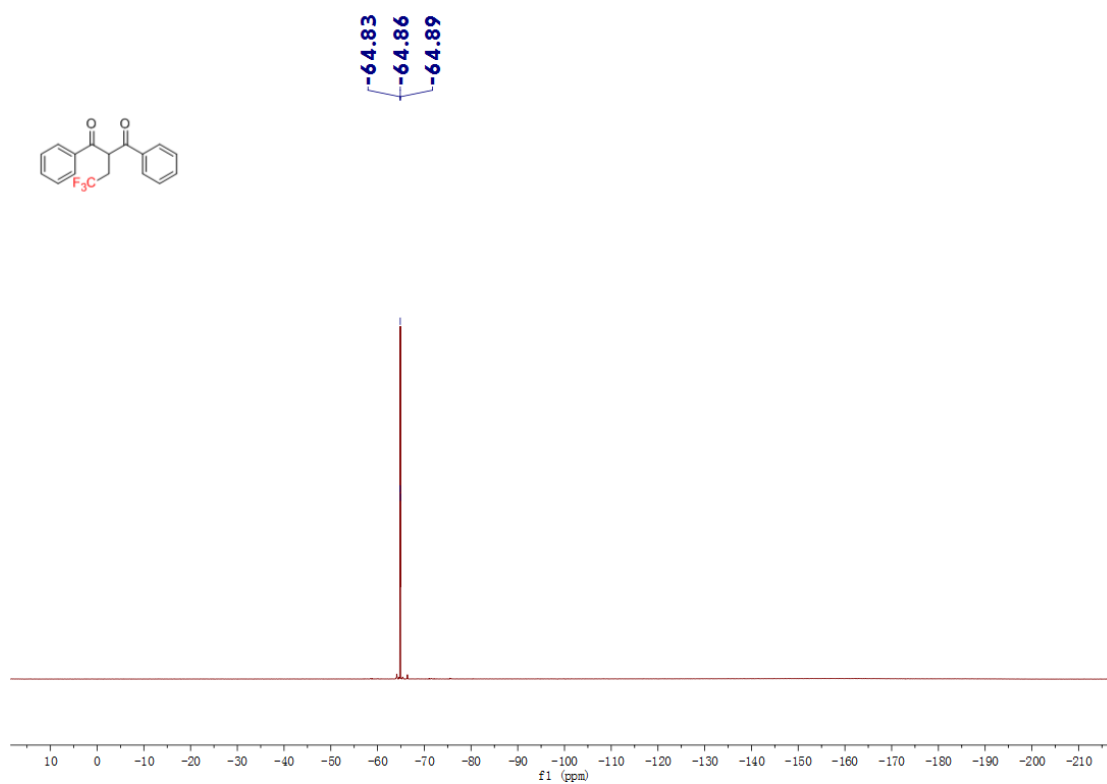

$^1\text{H}$ -NMR spectrum of **6** in  $\text{CDCl}_3$

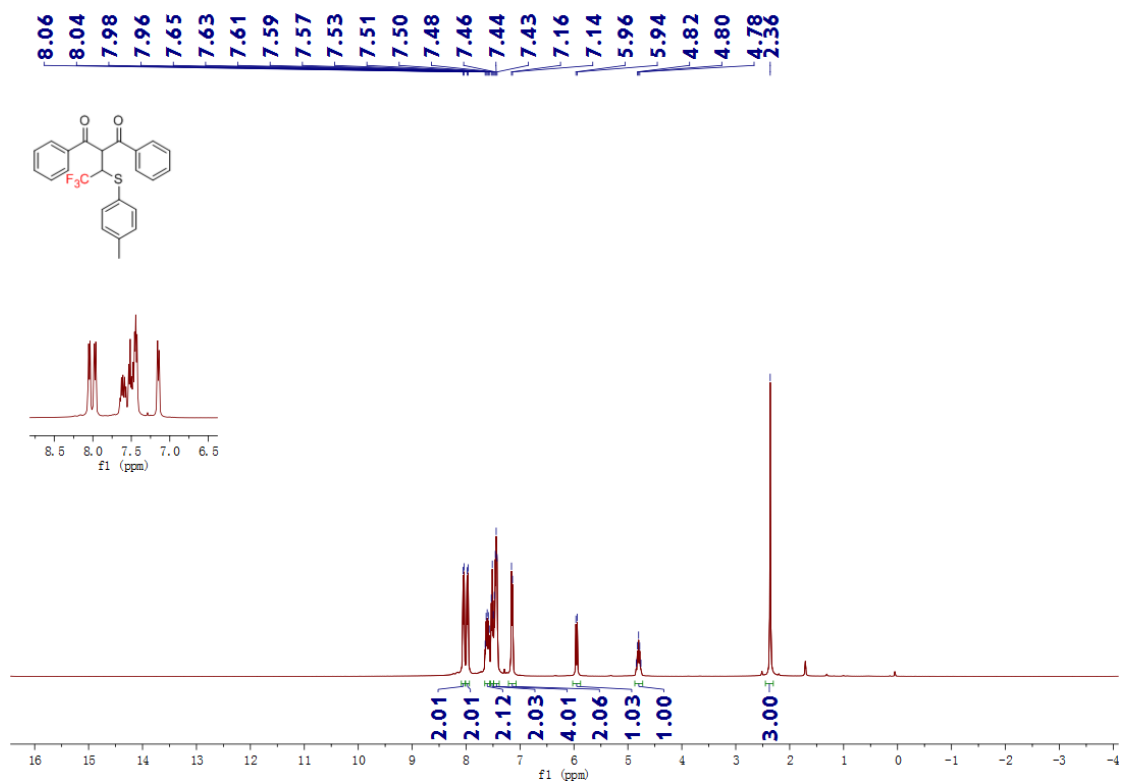

$^{13}\text{C}$ -NMR spectrum of **6** in  $\text{CDCl}_3$

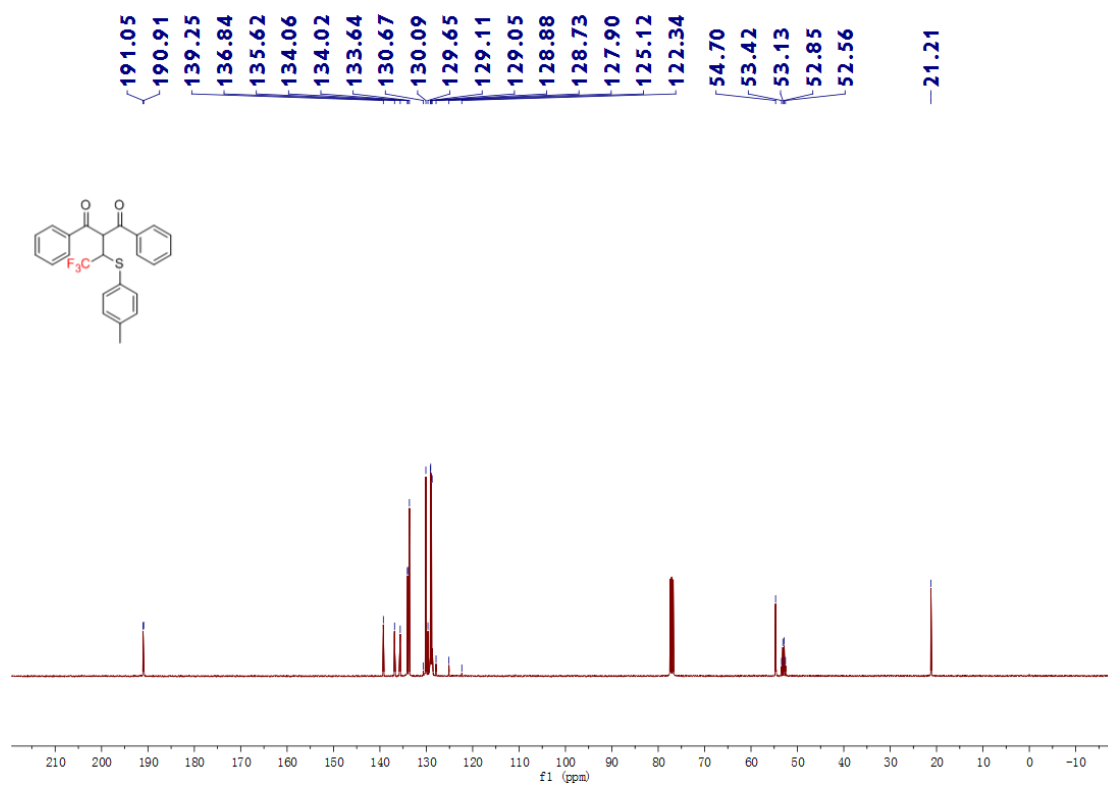

$^{19}\text{F}$ -NMR spectrum of **6** in  $\text{CDCl}_3$

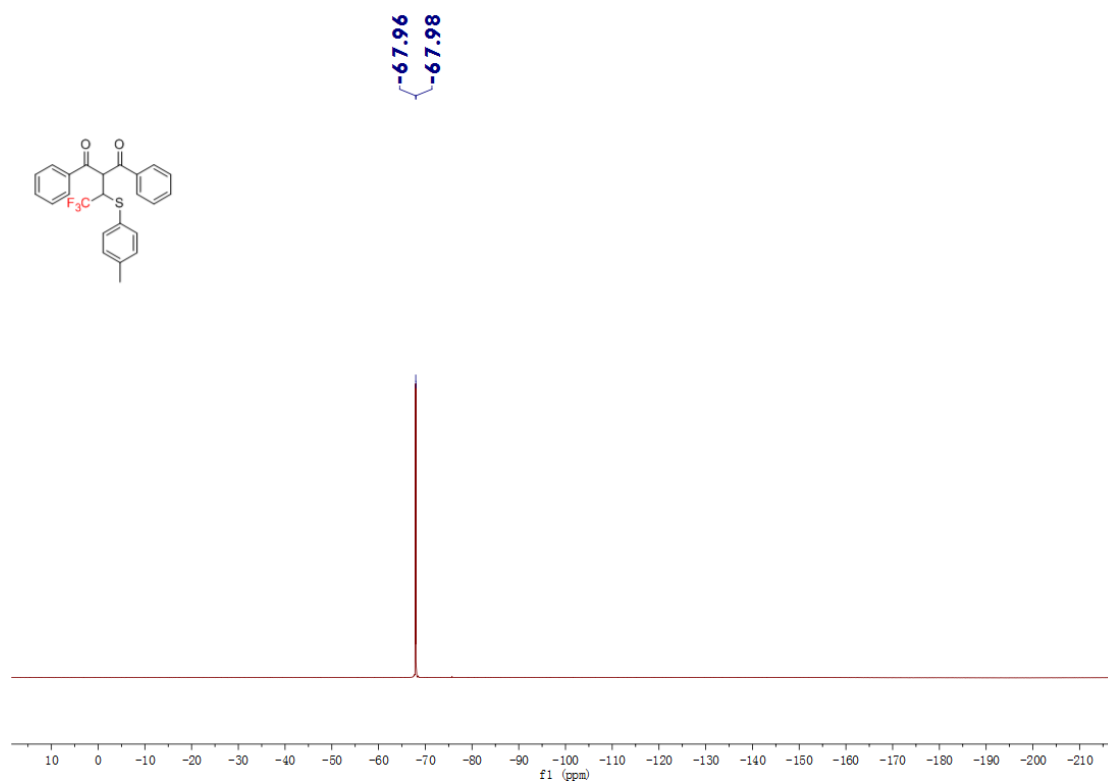

Supplement: c8qo01118d1.pdf [file c8qo01118d1.pdf]
